# Supplementary material for: Reporting reimbursement price decisions for onco-hematology drugs in Spain
Source: Front Public Health. 2023 Oct 24;11:1265323. doi: 10.3389/fpubh.2023.1265323 (PMC10627880; doi:10.3389/fpubh.2023.1265323)
Supplement: Supplementary file 1 [file Table_1.XLSX]

## Sheet: Original
Criteria	METRIC	Definition	EPAR	Unit		EPAR	Unit		EPAR	Unit		EPAR	Unit		EPAR	Unit		EPAR	Unit		EPAR	Unit		EPAR	Unit		EPAR	Unit		EPAR	Unit		Criteria	METRIC	Definition	EPAR	Unit		EPAR	Unit		EPAR	Unit		EPAR	Unit		EPAR	Unit
Evaluator				Of Time	Source / Comments		Of Time	Source / Comments		Of Time	Source / Comments		Of Time	Source / Comments		Of Time	Source / Comments	gemma	Of Time	Source / Comments		Of Time	Source / Comments		Of Time	Source / Comments		Of Time	Source / Comments		Of Time	Source / Comments	Evaluator			MO/DG	Of Time	Source / Comments	MO/DG	Of Time	Source / Comments	MO/DG	Of Time	Source / Comments	MO/DG	Of Time	Source / Comments	MO/DG	Of Time
Identification EPAR #			EMEA/H/C/004249/0000			EMEA/H/C/004213/0000			EMEA/H/C/004302/0000			EMEA/H/C/004302/0000			EMEA/H/C/004030/0000			EMEA/H/C/004272/0000			EMEA/H/C/004674/0000			EMEA/H/C/004580/0000			EMEA/H/C/004579/0000			EMEA/H/C/004182/0000			Identification EPAR #			7		molt poca info, hem mirat bastant el nostre IT	14			32			44			54
Product (active)			Niraparib -2			Ribociclib			Abemaciclib			Abemaciclib			Neratinib			Rucaparib			Talazoparib			Encorafenib			Binimetinib			Padeliporfin			Product (active)			Midostaurina			Inotuzumab ozagamicin			Mogamulizumab			Daunorubicina / Citarabina			Gemtuzumab ozogamicin
Product (Brand)			Zejula			Kisqali			Verzenios			Verzenios			Nerlynx			Rubraca			Talzenna			Braftovi			Braftovi			Tookad			Product (Brand)			Rydapt			Besponsa			Poteligeo			Vyxeos			Mylotarg
Indication (tumour)			C. de ovari- manteniment, no restringit per BRCA			C. de mama avançat, RH+, HER2-, combinat amb inh de l'aromatasa			C. de mama, avançat, RH+. HER2- combinat amb hormonoteràpia en primera L o posteriors			C. de mama, avançat, RH+. HER2- combinat amb hormonoteràpia en primera L o posteriors			C. de mama, HR (+) i HER2 (+)			C. Ovari BRCA +, 3a Linea (tractament)			C. Mama avançat, BRCA+, HER 2-, en 2a linea			Melanoma, avançat.			Melanoma			C. de Pròstata			Indication (tumour)			LMC			LLA			SS			LMA			LMA
			Orfe			cap consideració			cap consideració			cap consideració			cap consideració			Conditional						cap consideració			cap consideració			Cap consideració
Disease severity																																	Disease severity
Speed tumor growth	% increase (in tumor volume during one month) - category according to OS data in trials	Time of duplication for solid tumours; time of duplication for hematological tumours. Single source such as Harrison's textbook or other source - to be specified				SLP abemaciclib vs SLP palbociclib		SLP és de 10 a 20 mesos, depenenet del volumen mestatàtic i localització. IPT, pàg 1.	SLP ribociclib SLP palbo en 2ª línea						91,9 control del pivotal			13.6	months	IPT: DLP + trabectIdina mostra una SLP de 7,3 mesos pacients amb c. Ovari tractades amb un únic règim de QT basat en platí. 9,2 mesos per les pacients sensibles a platí i de 13, 6 mesos pels BRCA mutats (anàlisi retrospectiu).	SLP olaparib: 19,3	months	Olaparib es considera la millor alternativa.	SLP vemura/cobimetinib: 12,3	months	IPT cobimetinib. Mirar EPAR para la combinació dabra/trame, la variable principal és taxa relapsed free survival (mediana no assolida) Pembro: SLP // Relapse free survival: dabrafenib/trametinib. 40% SLP pembro: administrado cada 3 semanas (4,1, median) SLP nibo: 6,9	SLP vemura/cobimetinib: 12,3 SLP: dabrafenib/trametinib	months		4.5	years	IPT el temps mig fins a necessitar un tractament radical (progressió) en CP localitzat és de 4,5 anys	Speed tumor growth	% increase (in tumor volume during one month) - category according to OS data in trials	Time of duplication for solid tumours; time of duplication for hematological tumours. Single source such as Harrison's textbook or other source - to be specified	3	months	Control group PFS	1.8	Months	Median PFS SoC)	3.1	months	SLP control group	1.31	months	dades del grup control	16	months
% Metastasized	% patients	With metastasis at diagnosis; Cancer burden reports if the tumour is available : https://gco.iarc.fr/survival/survmark/			IPT: 60-78% de les pacients debuten amb estadis III-IV.			IPT: 5% dels cancers de mama diagnosticats són metastàtics			IPT: 5% dels cancers de mama diagnosticats són metastàtics			IPT: 5% dels cancers de mama diagnosticats són metastàtics						60-70% són diagnosticats en etpaes avançades (III-IV)				10-20%		EPAR, pàgina 9: 10-20% són metastàtics	10-20%		Epar pàgina 9: 10-20% són metastàtics	0.1		EPAR pàgina 8: 10% dels casos diagnòsticats són localment avançats o metatàtics IPT: al moment del diagnòstic, a Eruopa, el 15-20% estan en estadi avançat.	% Metastasized	% patients	With metastasis at diagnosis; Cancer burden reports if the tumour is available : https://gco.iarc.fr/survival/survmark/	NA			NA			NA			NA			NA
Expected survival 5-years	%	Survival expectation of indication as in https://gco.iarc.fr/survival/survmark/	0.29		IPT: 47% de supervivència global pel càncer d'ovari. Del 29% en estadi avançat, que és la indicació.	0.333333		IPT, pàg 1. Segons l'EPAR, pàgina 8: supervivència a 5 anys del 25% pel c. Mama metastàtic.	0.25		EPAR, pàgina 10: supervivència als 5 anys del c. Mama metastàtic del 25%	0.25		EPAR pàgina 10: supervivència als 5 anys del c. Mama metastàtic del 25%	0.7		EPAR pàg 9: SG a los 10 años de 70% en Europa. 83% malaltia local, 62% malaltia regional.	0.3		IPT: SG a 5 anys és del 47%, i disminueix al 29% en estadi avançat. EPAR: Advanced stage disease is associated with a 5-year survival rate of only 30% to 40%.				0.17		EPAR, pàgina 9-10: supervivència a 10 anys, del 75-85%. Supervivència a 5 anys, 17%. Si no es tracta:6-9 mesos	0.17		EPAR, pàgina 9-10: supervivència a 10 anys, del 75-85%. Supervivència a 5 anys, 17%. Si no es tracta:6-9 mesos	0.846		IPT: supervivencia relativa a los 5 años (84,6%)	Expected survival 5-years	%	Survival expectation of indication as in https://gco.iarc.fr/survival/survmark/	0.19		Aged dependent: 50% < 60 years old; 3-8% > 60 years old. EPAR.	7-10%		En adults amb primera recidiva	Micosis fungoide: 74,5%		En estadis inicials la supervivència es similar que en població general	0.21		Depen de l'edat, si s'estandarditza per edat surt del 19% (IPT)	45,6%/7,1%
Overall Survival	Months (median)	Overall Survival is: less than 6 months, 6 to 12 months, 12 to 24 months, more than 24months. Check for disease in Cancer burden reports WHO at: https://gco.iarc.fr/survival/survmark/	>24	months	EPAR, pàgina 10: SG olaparib per BRCA germinal +: 34,9 mesos. Tot i que les portadores de mutacions BRCA tenen millor pronòstic (IPT niraparib).	>24	months	epar pàgina 8: mediana de supervivènvia global pels RH+/HER2-: 2,5-4 anys.	>24	months	EPAR, pàgina 10: mediana de supervivènvia global pels RH+/HER2-: 2,5-4 anys.	>24	months	EPAR, pàgina 10: mediana de supervivènvia global pels RH+/HER2-: 2,5-4 anys.	Not identified			Not identified			12 to 24	months	Estudi pivot d'olaparib olimpi AD: SG de 19, 3 mesos. Olaparib es considera la millor alternativa	>24	months	Table 83. Effects Table for Binimetinib in Combination with Encorafenib for the Treatment of Adult Patients with Unresectable or Metastatic Melanoma with BRAF V600 mutation --> 33.6	>24	months	Table 83. Effects Table for Binimetinib in Combination with Encorafenib for the Treatment of Adult Patients with Unresectable or Metastatic Melanoma with BRAF V600 mutation --> 33.6	>24	month	IPT: Supervivència als 10 anys en pacients amb CProstata localitzat d'entre el 96-100%	Overall Survival	Months (median)	Overall Survival is: less than 6 months, 6 to 12 months, 12 to 24 months, more than 24months. Check for disease in Cancer burden reports WHO at: https://gco.iarc.fr/survival/survmark/	25.6	months	Informe tècnic	<6	Months		> 24 months			<6	months	dades del grup control	between 12-24	months
Physical function and general health (SF36 - EQ5D - eortc qlq-c30)	Score	Collect baseline value and maximum value for 100% health.			Pivot, material supplementari: EQ-5D-5L: consta el valor basal i també el valor al llarg dels cicles fins a post pregressió. Per cohorts separades segons la mutació BRCA, no hi ha dades del conjunt de la població	64.5		EPAR pàgina 67: EORTC QLQ-C30: dades basals: (64.5 [20.25]) intervenció VS 64 [21.07] control)	65		EPAR, pàgina 68: EORTC QLQ-C30: 65 experimental vs. 59 el grup placebo.	64		EPAR: pàgina 79: EORTC QLQ-C30: 64 en els dos grups	FACT-B total score: 114.4 (16.0) Nera EQ-5D index: 0.86 (0.16) Nerat EQ-5D health state: 81.5 (13.2) Nera	Mean (SD)	FACT-B total score: 114.4 (16.0) Neratinib vs 114.4 (16.1) Placebo EQ-5D index: 0.86 (0.16) Neratinib vs 0.86 ( 0.18) placebo EQ-5D health state: 81.5 (13.2) Nera vs 81.6 (13.4) placebo Dels anexes de l'assaig pivotal.	Not identified			61.9		EPAR, pàgina 83: EORTC-QLQ-c30, BASAL: 61.9 [95% CI: 59.0, 64.7] vs 60.9 [95% CI: 56.9, 64.9]	66.72		EPAR pàgina 95: basal: EORTC QLQ-C30	66.72		EPAR pàgina 95: basal: EORTC QLQ-C30	82		EPAR pàgina 72: número d'onservacions basals per padeliporfina: 82.5 vs. 81.8 per la vigilància activa.	Physical function and general health (SF36 - EQ5D - eortc qlq-c30)	Score	Collect baseline value and maximum value for 100% health.	NA			0.76	EQ-5D	SoC	NA			NA			NA
Size of affected population - priorise ESP data, if no EU, if no Other															20 or 25% of entire breast cancer population re HER2+		~EPAR (9)				5-10% of breast cancers are associated with mutations in BRCA		EPAR, pàg 10										Size of affected population - priorise ESP data, if no EU, if no Other
Prevalence	n/100.000	Proportion of cases in a given population at a given time	42,9 / 100.000		IARC, prevalença càncer ovari en Espanya, ambdós sexes, 2020 a 5 anys ajustada per edat. 10204 casos	577,3 / 100.000	5 years	IARC, prevalença càncer de mama, a 5 anys, ajustada per edat.	577,3 / 100.000	5 years	IARC, prevalença càncer de mama, a 5 anys, ajustada per edat.	577,3 / 100.000	5 years	IARC, prevalença càncer de mama, a 5 anys, ajustada per edat.	577,3 / 100.000	5 years	IARC, prevalença càncer de mama, a 5 anys, ajustada per edat.	42,9 / 100.000		IARC, prevalença càncer ovari en Espanya, ambdós sexes, 2020 a 5 anys ajustada per edat. 10204 casos	577,3 / 100.000	5 years	IARC, prevalença càncer de mama, a 5 anys, ajustada per edat.	42		IARC: Prevalença a 5 anys, en 2020, 42/100.000	42/100.000		IARC: Prevalença a 5 anys, en 2020, 42/100.000	596.2		iarc: prevalença a 5 anys, homes, 2020: 596,2/100.000	Prevalence	n/100.000	Proportion of cases in a given population at a given time	0,1-0,3/100.000		EPAR	1-5/10.000		Orphanet	unknown		orphanet, IPT, EPAR	13,6/100.00			NA
Incidence	n/100.000	Number of new cases per population at risk in a given time period	7,5 / 100.000		IARC, incidencia càncer ovari en Espanya, ambdós sexes, 2020. Incidencia crua 14,8 / 100.000 hab	74,4/100.000 habitants	1 year	IPT: 201, 32825 casos nou de càncer de mama. 74,4 per cada 100.000 habitants. IARC: 77,5/100000 habitants incidència ajustada per edat.2020. La tasa crua és 143,4 / 100.000	74,4/100.000	1 year	IPT: 201, 32825 casos nou de càncer de mama. 74,4 per cada 100.000 habitants. IARC: 77,5/100000 habitants incidència ajustada per edat.2020. La tasa crua és 143,4 / 100.000 Segons l'EPAR pàgina 9: incidència cancer de mama europa 2012: 94.2/100 000	74,4/100.000	1 year	IPT: 201, 32825 casos nou de càncer de mama. 74,4 per cada 100.000 habitants. IARC: 77,5/100000 habitants incidència ajustada per edat.2020. La tasa crua és 143,4 / 100.000 Segons l'EPAR pàgina 9: incidència cancer de mama europa 2012: 94.2/100 000	74,4/100.000	1 year	IPT: 201, 32825 casos nou de càncer de mama. 74,4 per cada 100.000 habitants. IARC: 77,5/100000 habitants incidència ajustada per edat.2020. La tasa crua és 143,4 / 100.000 Segons l'EPAR pàgina 9: incidència cancer de mama europa 2012: 94.2/100 000	7,5 / 100.000		IARC, incidencia càncer ovari en Espanya, ambdós sexes, 2020. Incidencia crua 14,8 / 100.000 hab	74,4/100.000	1 year	IPT: 201, 32825 casos nou de càncer de mama. 74,4 per cada 100.000 habitants. IARC: 77,5/100000 habitants incidència ajustada per edat.2020. La tasa crua és 143,4 / 100.000 Segons l'EPAR pàgina 9: incidència cancer de mama europa 2012: 94.2/100 000	8/100.000		EPAR, pàg9: 123,135 nous casos al 2012, a Europa. A les zones mediterrànies, la icnidència varia entre el 3-5/100.000 casos a l'any. IPT: Incidència a Espanya: 8/100.000, dels quals un 2% en estadis avançats. Iarc: incidència ajustada per edat melanoma 2020: 6,8/100.000. La incidència crua és de 12,3/100.000	8/100.000		EPAR, pàg9: 123,135 nous casos al 2012, a Europa. A les zones mediterrànies, la icnidència varia entre el 3-5/100.000 casos a l'any. IPT: Incidència a Espanya: 8/100.000, dels quals un 2% en estadis avançats. Iarc: incidència ajustada per edat melanoma 2020: 6,8/100.000. La incidència crua és de 12,3/100.000	150,6 /100 000	Dades de incidència crua en espanya	Incidència ajustada per edad, 2020: 70,6/100.000 *EPAR pàgina 8: al 2012 420,000 nous casos de càncer de pròstata a Europa. *IPT: 30,000 casos de càncer de pròstat nous, al 2017. iarc: espanya, i	Incidence	n/100.000	Number of new cases per population at risk in a given time period	4,2/100.000		IPT	1,3/100.000		EPAR. Incidència crua	0.4-1/100,000		IPT	3,5/100.000			4,3/100.000
Unmet needs																																	Unmet needs
Treatment options	With/Without alternative	The alternative is therapeutic abstention	with		Olaparib está finaciat en el moment d'evaluació per la mateixa indicació, però restringit a BRCAmutat.	with			with			with			with		El tractament estàndard seria tractament hormonal, però cap fàrmac ha sigut aprovat per a la indicació de tractament adjuvant perllongat.	with			with			with			with			with			Treatment options	With/Without alternative	The alternative is therapeutic abstention	with		EPAR	with			with			with			with
Type of standard of care	Chemotherapy / Immunotherapy / Directed agents /Surgery / Radio/ Combined /Others / None	Collect name of agents used, if any // radiotherapy// surgery - Use clinical guidance: SEOM/icopraxis/catsalut, ESMO guidance, ASCO guidance.	Directed agents		Olaparib per BRCA germinal mutat.	Directed agents		Palbociclib o abemaciclib combinats amb un inhibidor de l'aromatasa. Teràpia hormonal amb inhibidors de l'aromatasa i fulvestrant.	Directed agents		Palbociclib i ribociclib en primera línia. IPT i EPAR: Palbociclib en segona línia o en pacients prèviament tractades amb teràpia hormonal, fulvestrant, o qt, o la combinació exemestano + everolimus	Others		Palbociclib i ribociclib en primera línia. IPT i EPAR: Palbociclib en segona línia o en pacients prèviament tractades amb teràpia hormonal, fulvestrant, o quimioteràpia, o la combinació exemestano + everolimus	Directed agents		Inhibidors de l'aromatasa o tamoxife durant 5 anys com a adjuvància, després d'un any de trastuzumab.	Chemotherapy		IPT: no hi ha tractaments autoritzats específicament per la tercera línia o posteriors.Tot i que es proposa com alternativa la Doxorubicina liposomal, pegilada (DLP) ,el topotecan, trabectedina i DLP o trabectedina + paclitaxel	Directed agents		EPAR pàgina 12: olaparib, capecitabina, eribulinai quimioteràpia basada en platí.	Directed agents		IPT: inhibidor BRAF y un inhibidor MEK o la inmunoterapia con anti-PD1 (nivolumab o pembrolizumab). EPAR PÀGINA 10-11: Vemurafenib/cobimetinib, dabrafenib/trametinib	Directed agents		IPT: inhibidor BRAF y un inhibidor MEK o la inmunoterapia con anti-PD1 (nivolumab o pembrolizumab). EPAR PÀGINA 10-11: Vemurafenib/cobimetinib, dabrafenib/trametinib	Others		IPT: opcions terapèutiques del CP de baix risc: vigilància activa, tractament radical (prostatectomia radical, radioteràpia externa, braquiteràpia) i el tractament focal (ablació crioquirúrugica, ultrasons focalitzats d'alta intensitat o teràpies fotodinàmiques)	Type of standard of care	Chemotherapy / Immunotherapy / Directed agents /Surgery / Radio/ Combined /Others / None	Collect name of agents used, if any // radiotherapy// surgery - Use clinical guidance: SEOM/icopraxis/catsalut, ESMO guidance, ASCO guidance.	Combined		chemotherapy (idarubicina, citarabina, etopòsid, mitoxantrona) and allogeneic haematopoietic stem cell transplantation (ASCT)	Combined		fludarabine/cytarabine/GCSF 4 cycles (4 set. Per cicle)// MXN/ara-c/metotrexat/cytarabine (4 cycles (14-20 days/cycle)// HIDAC-high dose cytarabine every 12 h up to 4 cycles (a second cycle was allowed)	Combined		terapia fotodinàmica, radio, quimio. En malaltia avançada es pot tractar amb: quimio sitèmca, fotoferesis sola o amb interfero, o metotrexate, bexaroteno o retinoides i/o radi. Agents autoritzats a UE: bexaroteno, bleomicina, dexametasona, interfero alfa, brentuximab vedotn. Vorinostat grup control al phase III	Chemotherapy		citostaticos convencionales citarabina i daunorubicina pauta 7+3	Chemotherapy
Comparative effectiveness																																	Comparative effectiveness											A
Progression Free Survival	Months (median )	The median survival time during which patients have not experienced disease progression	11.3	months	11,3 vs 4,7 (control) per a tota la població del estudi (BRCAm y BRCAwt, que es la població de la inidcació)	25.3	months	Seguiment de 24 mesos: 25,3 vs. 16,0 IPT, monaleesa 2	28	month	IPT, Pel Monarch 3 : 28 mesos vs 15 mesos HR: 0,54 (0,41 ; 0,72)	16.9	months	IPT Monarch 2 anàlisi final de SLP: 16,9 mesos vs. 9,3mesos (control)	0.942		Variable: supervivència lliure de malaltia invasiva: taxa de pacients amb esdeveniment. EPAR, pàgina 86: 94,2% vs 91.9 % HR 0,66 (0,49 ; 0,90)	10	months	IPT: No hi ha comparador: 289 dies EPAR, pàg 90: 10 mesos (7,1 ; 12,5)	8.6	months	EPAR, pàg 79: 8,6 vs. 5,6 (control)	14.9	month	IPT: encora/binimetinib 14,9 nesis vs. 9,6 mesos HR: 0,75 (0,56 ; 1,00), p=0,051	14.9	month	IPT: encora/binimetinib 14,9 nesis vs. 9,6 mesos HR: 0,75 (0,56 ; 1,00), p=0,051	28.3		IPT: S'evalua el temps fins a progressió: 28,3 mesos pel grup actiu vs. 14,1 mesos.	Progression Free Survival	Months (median )	The median survival time during which patients have not experienced disease progression	Supervivència lliure d'esdeveniment: 8,2	months	Supervivència lliure d'esdeveniment. 95%CI: 5,4-10,7. HR: 0,78 [95%CI: 0,66-0,93] Aquest estudi te disease free survival or event free survival, no te PFS	5		HR: 0,452 [95%CI: 0,349-0,586]; p<0,0001	7.7	months	(IC95%: 5,67 a 10,33) Effect estimate per comparison; HR:0,53 [95%CI: 0,41-0,69]; p<0,0001	2.53		Supervivencia libre de eventos (2,07-5) HR: 0,74, 1-sided, p=0,011	28
Progression Free Survival	Months (difference)	The median survival time during which patients have not experienced disease progression	6.6	months	IPT: HR: 0,38 (0,3 ; 0,48), p<0,0001	9.3	months	HR 0,568 (0,457 ; 0,704), p= 9,63 x10-8	13	month		7.6	months	HR:0,553 (0,449 ; 0,681)	0.023		% de pacients	_		No hi ha braç control	3	months	HR 0,542 (0,413 ; 0,711) p<0,0001	5.3			5.3			14.2		Pàgina 82-83 EPAR: HR de temps fins a progressió ipsilateral: 0,17 respecte 0,34 per la vigilància activa HR 0,34; IC 95%: 0,24 - 0,46, p< 0,001 considera la població que compleix la indicació (post-hoc): temps fins a la progressió ipsilateral: HR0,11. Temps fins a la progressió global: 0,31	Progression Free Survival	Months (difference)	The median survival time during which patients have not experienced disease progression	5.2	months	Aged dependent: 50% < 60 years old; 3-8% > 60 years old. EPAR.	3.2		Control arm 1,8	4.6	months	SLP control group 3,1 month	1.22		Control group: 1,31 (1,08-1,6)	16.6
Objective Response Rate (RECIST/MRD)	% Patients (observed)	The proportion of patients that experience complete response and partial response	Not evaluated		És tractament de manteniment	0.407		EPAR, página 66: hi ha dades més actualitzades:Taxa de resposta global: 42,5 vs 28,7%. Però no desglosa el % de RC o RP. S'agafen les dades prèvies del pivot, ja que els % tampoc varien massa més: 40,7% vs. 27,5%.	0.497		EPAR, pàgina 67: 49,7 vs. 36.45. Segons el protocol d'estudi, mesurat per RECIST (https://www.clinicaltrials.gov/ProvidedDocs/21/NCT02246621/Prot_003.pdf)	0.352		IPT: Pel Monarch 2, la TRO va ser de 35,2 VS. 16,1 (control) Segons el protocol de l'estudi, mesurat per RECIST (https://www.clinicaltrials.gov/ProvidedDocs/03/NCT02107703/Prot_004.pdf)			No s'avalua a l'estudi principal. A l'EPAR, pàg 112, hi ha un estudi de suport amb dades de TRO. No he trobat si són segons RECIST,.... TRO global del 25,4%. En pacients que han rebut tractament amb trastuzumab prèviament la resposta és similar a la global, tant expresin receptors hormals com no, mentre que sense tractament previ amb trastuzumab, la TRO és més alta, del 61%	0.717		IPT: només hi ha una cohort: 71,7% confirmada per RECIST segons l'investigador, que és la varibale principal de l'estudi conjunt. EPAR pàgina 87: ORR per la població global confirmada per RECIST per un comitè independent 44,3%, 7,5% de RC i 36,8% de RP.	0.626		EPAR, pàgina 81-82.Dades no confirmades pel comitè independent, ja que no era un criteri necessari: 62,6% vs 27,2 % (control) Dades confirmades pel comitè independent: 50,2% vs 18,45 (control)	0.63		IPT: RECIST, per revisió central: 63% vs. 50,5 per encorafenib en monoteràpia	0.63		IPT: RECIST, per revisió central: 63% vs. 50,5 per encorafenib en monoteràpia	Not evaluated		IPT: No es mesura la resposta segons RECIST. Es mesura el % de pacients lliures de càncer per biòpsia negativa al cap de 24 mesos: 49% vs.13,5%. L'ipt aporta dades de la població que compliria els criteris d'estudi, anàlisi post-hoc amb el 385 de la població: 45,0% vs. 10,3%	Objective Response Rate (RECIST/MRD)	% Patients (observed)	The proportion of patients that experience complete response and partial response	NA			NA			0.28		CI95% 21,6 - 35	0.477			0.815
Objective Response Rate (RECIST/MRD)	% Patients (difference)	The proportion of patients that experience complete response and partial response	Not evaluated		_	0.132			13.3%			0.191		EPAR: pàgina 79: 3,1 vs 0,4% (control)	Not evaluated			_		No hi ha braç control	0.354			0.125			0.125			Not evaluated			Objective Response Rate (RECIST/MRD)	% Patients (difference)	The proportion of patients that experience complete response and partial response	NA			NA			0.232		control: 4,8 (CI95%:2,2 - 9)	0.144		Control group 33,3	0.08
Complete response (RECIST/MRD)	% Patients (observed)	The proportion of patients that experience complete response	Not evaluated		És tractament de manteniment	2.7%		PIVOt: 2,7% vs2.1%	0.027		IPT: RC 2,7 vs 0,6%	0.031			Not evaluated			0.085		No està basat en criteris RECIST	5,5,%		EPAR, pàgina 82. Dades no confirmades pel comitè independent, ja que no era un criteri necessari: 5,5% vs. 0% (control). Dades confirmades pel comité indpendent: 5,5% vs 0% (control)	0.08		8% vs 5%	0.08		8% vs 5%	Not evaluated			Complete response (RECIST/MRD)	% Patients (observed)	The proportion of patients that experience complete response	0.589			0.807			0.043		EPAR: Treatment with mogamulizumab resulted in 8 confirmed complete responses (complete clearing of all affected compartments) compared with 0 patients on vorinosta - pag. 10-	37.3			0.704
Complete response (RECIST/MRD)	% Patients (diference)	The proportion of patients that experience complete response	Not evaluated		_	0.6%			0.021			0.027			Not evaluated			_		No hi ha braç control	0.055			0.03			0.03			Not evaluated			Complete response (RECIST/MRD)	% Patients (diference)	The proportion of patients that experience complete response	0.054		Control group: 53,5%	0.513		Control arm: 29,4	0.043			11.7		Control group 25,6	0.005
Partial response (RECIST /MRD)	% Patients (observed)	Reduced tumor burden but residual disease detectable	Not evaluated		És tractament de manteniment	0.38		Pivot: 38.0% vs. 25,4%	0.47		IPT:RP: 47, 0 vs 36,4 pel monarch 3.	0.321		EPAR pàina 79: 32,1 vs. 15,7	Not evaluated			0.462		No està basat en criteris RECIST	0.571		EPAR, pàgina 82, dades no confirmades pel comitè independent, ja que no era un criteri necessari: 57,1 vs 27,2 (control) Dades confirmades pel comitè: 44,7% vs 18.4% (control)	0.55		55% vs. 45%	0.55		55% vs. 45%	Not evaluated			Partial response (RECIST /MRD)	% Patients (observed)	Reduced tumor burden but residual disease detectable	NA			NA			0.189			10.5		Respuesta completa con recuperación hematológica incompleta	0.111
Partial response (RECIST /MRD)	% Patients (difference)	Reduced tumor burden but residual disease detectable	Not evaluated		_	0.126			0.106			0.164			Not evaluated			_		No hi ha braç control	0.299			0.1			0.1			Not evaluated			Partial response (RECIST /MRD)	% Patients (difference)	Reduced tumor burden but residual disease detectable	NA			NA			0.141		EPAR, pag 10 Table 2	2.8		Control group 7,7	0.074
Long responders	Mentioned (%)	Mentioned (%)	Not mentioned		IPT pàgina 3: 44,4% exposat al tractament durant 12 mesos o més	No mencionat		EPAR, pàgina 86: 58,1% exposats durant més de 12 mesos al grup experimental. 13,2% més de 18 mesos.	No mencionat			Not mentioned			Not identified			Not mentioned		Durada de la resposta de 9,6 mesos. El 69, 2% recibió más de 6 meses de tratamiento. 25% de las pacientes BRCAm recibió más de 12 meses de tratamiento. EPAR. Pàg 115.	Not mentioned		EPAR, pàg 106: 18,5% dels pacients van estar exposats al tractament igual o més de 12 mesos.							Not Mentioned		27.1% of patients in treatment group presented progression after 24 months. EPAR (65)	Long responders	Mentioned (%)	Mentioned (%)	0.51		Percentatge de superivents +4anys	NA			NA			Not mentioned			NA
Overall Survival	Months (median)	The median time from treatment randomisation to death	Not reached		IPT: HR: 0,73 (0,48 ; 1,12), p=0,1545	Not Reached		EPAR, pàgina 65: No assolida vs. 33.0 mesos. HR : 0,746 (0,517 ; 1,078) IPT: dades immadures, 15% d'esdeveniments pel grup intervenció	No assolida		No assolida IPT: monarch 3: HR: 1,05 (0,68 ; 1,63)	46.7	month	IPT i EPAR (pàgina 87). dades en el punt de tall: NA vs. NA, dades de juny de 2019: Pel Monarch 2: 46,7 mesos vs. 37,3 mesos.	Not reached		EPAR pàg 112:An OS analysis has not been conducted because the required number of deaths has not been reached.	Not reached		No assolida. Pàgina 99 EPAR: NA (21,7 ; NA)	22.3	months	EPAR, pàg 81-82: 22,3 mesos vs. 19,5 (control)	33.6	months	EPAR pàgina 91: 33,6 vs 23,5 HR 0,81 (0,61 ; 1,06), p = 0,0613	33.6	months	EPAR pàgina 91: 33,6 vs 23,5 HR 0,81 (0,61 ; 1,06), p = 0,0613	Not evaluated			Overall Survival	Months (median)	The median time from treatment randomisation to death	74.7	months	HR: 0,77 [95%CI: 0,63-0,95]	7.7		HR: 0,77 [95%CI: 0,57-0,993; p<0,0105	not achieved		Effect estimate per comparison: HR: 0,93 [95%CI: 0,61-1,43] p=0,9439	9.56	month	HR: 0,69 [95%CI: 0,52-0,9] p=0,03	27.5	months
Overall Survival	Months (difference)	The median time from treatment randomisation to death	_		No aplica	_		No aplica	NA		No aplica	0.094	month	HR 0,854 ( 0,598 ;1,221) p=0,389						no aplica	2.8	months	HR: 0,861 (0,547 ; 1,060)	10.1			10.1			Not evaluated			Overall Survival	Months (difference)	The median time from treatment randomisation to death	49.1	months		1			not achieved		43,93 months (43,57, -)	3.61	month	Control group: 5,95	5.7
Comparative safety/tolerability																																	Comparative safety/tolerability
Any Advers Events	% Patients (observed)	The proportion of patients experiencing an adverse event	1		100% vs. 96% (control)	0.985		EPAR, pàgina 87: 98,5% vs. 97,0% (control)	0.945		IPT: 94,5% vs. 56,5% EPAR: pàgina 100: 98,8% vs. 94,4%	0.986		EPAR, pàgina 107: 98,6% vs. 89,2% (control)	0.985		EPAR, pàgina 121: 98,5 vs. 88,1% (control)	1		EPAR, pàgnina 118: pels 143 pacients amb BRCA mutat, la versió actualitzada . No coincideix amb els 106 de la població d'eficàcia, perqué els 37 restants van rebre solament 1 linea de quimio prèvia i no complien el criteri de la indicació. Para la població amb càncer d'ovari en general ( 377) va ser del 100%	0.986		EPAR, pàg 108: 98,6 vs. 97,6% (control)	0.989		EPAR pàgina 117: 98,9% vs 99,5%	0.989		EPAR pàgina 117: 98,9% vs 99,5%	94.9%		IPT pàgina 5: 94,95 vs. 55,1% (control)	Any Advers Events	% Patients (observed)	The proportion of patients experiencing an adverse event	1			0.944			0.973			1			0.985
Any Advers Events	% Patients (difference)	The proportion of patients experiencing an adverse event	0.04			0.015			0.38			0.094			0.104			_		No hi ha braç control	0.01			0.006			0.006			0.398			Any Advers Events	% Patients (difference)	The proportion of patients experiencing an adverse event	NA			-0.056		Control group 100%	-0.022		Control group 99,5	0			0.043
Non-Fatal Serious Advers Events (>3)	% Patients (observed)	The proportion of patients experiencing a Grade > 3	0.74		EPAR, pàgina 91: grade 3-4: 74% vs 23% (control)	0.812		IPT: EA grau 3-4: 81,2% vs. 32,7% (control)	0.514		ipt grau 3 o mes: 51,4% vs. 6,8% EPAR, pàgina 100: 61,8 vs. 26,1%	0.626		ipt: grau 3-4: 62,6% vs. 23,8% (control)	0.497		grau 3-4: EPAR, pàgina 121: 49,7% vs. 13,1% (control)	0.671		EPAR pàgina 118: AE grau 3-4 versió actualitzada las 120 dies en població BRCAm. Per a l apoblació de càncer d'ovari (377) va ser 62,6%	0.675		EPAR, pàgina 108: grau 3 o 4: 67,5% vs 63,5% (control)	0.578		EPAR pàgina 117: 57,8% grau 3-4 vs. 67,3%	0.578		EPAR pàgina 117: 57,8% grau 3-4 vs. 67,3%	0.218		IPT pàgina 5, grau 3-4: 21,8% vs. 9,7% (control)	Non-Fatal Serious Advers Events (>3)	% Patients (observed)	The proportion of patients experiencing a Grade > 3	0.888			0.512		Dades IPT: eventos adversos graves comunicados	0.255			0.923			0.87
Non-Fatal Serious Advers Events (>3)	% Patients (difference)	The proportion of patients experiencing a Grade > 3	0.51			0.485			0.446			0.388			0.366			_		No hi ha braç control	0.04			0.095			0.095			0.121			Non-Fatal Serious Advers Events (>3)	% Patients (difference)	The proportion of patients experiencing a Grade > 3	NA			0.015		Control group 49,7	-0.094		Control group: 34,9%	0.025		control group: 89,8	0.045
Fatal Advers Events (Grade 5 AEs)	% Patients (observed )	The proportion of patients experiencing a Grade 5 adverse event	0		IPT: No se comunicaron muertes por EA durante el tratamiento, si bien, durante el seguimiento del estudio hubo 3 muertes por síndrome mielodisplásico o leucemia mieloide aguda (1 en el grupo de niraparib y 2 en el grupo placebo). 2 de las muertes (1 en cada grupo) fue en relación con la medicación a juicio del investigador.	0.006		EPAR, pàgina 87: morts: 6,9% (23) vs. 5.8% (19). Durant el tractament 0.9% (3) vs. 0.3% (1). Pàgina 98: morts ambEA com a ppal causa: 0,6% (2) intervenció vs 0 grup placebo	0.024		EPAR, pàgina 100: 2, 4% (8) vs. 1.2 (2) . Pàgina 102: Morts totals durant el tt i en els 30 dies posteriors van ser 15 en el grup experimental, 11 d'elles degudes a EA. No surten les de placebo.	0.014		IPT: 7 vs. 2 EPAR: 1,4%(6) vs. 0,4% (1). Es mostren les de l'epar que hi ha el número concret.	0.001		EPAR, pàgina 124- 125: 2 morts al grup neratinib i una al grup placebo (0,1 vs 0.1)	0.042		EPAR pàgina 118: AE with outcome of death versió actualitzada las 120 dies en població BRCAm. Per a la població de càncer d'ovari (377) va ser 2,7%	0.021		EPAR, pàg 108: 2,1% vs 3,2% (control).	0.102		IPT: 10,2% vs 7,4%	0.102		IPT: 10,2% vs 7,4%	0.005		Epar pàgina 102: 0,5% vs. 0 (IPT)	Fatal Advers Events (Grade 5 AEs)	% Patients (observed )	The proportion of patients experiencing a Grade 5 adverse event	0.026			0.159			0.016			0.091			0.061
Fatal Advers Events (Grade 5 AEs)	% Patients (difference)	The proportion of patients experiencing a Grade 5 adverse event			No aplica	0.006			0.012			0.01			0			_		No hi ha braç control	0.011			0.028			0.028			0.005			Fatal Advers Events (Grade 5 AEs)	% Patients (difference)	The proportion of patients experiencing a Grade 5 adverse event	0.005		Control group: 2,1%	0.047		control group 11,2%	-0.032		Control group: 4,8	-0.032		control group: 12,3	0.01
Dosage adjustment due to adverse effects	Mentioned	Mentioned	Yes		IPT: 67% van reduir la dosi en el grup niraparib. El 69% va interrompre el tractament. EPAR: pàgina 91: 69% reduccions de dosi, 67% interrupcions Pivot (material suplementari): 66,5%.	Yes		IPT: reduccions de dosi: 50,6% vs. 4,2% EPAR, pàgina 87: EA que van requerir interrupcions o reduccions e dosi: 73,1% vs. 15,8%	Yes		IPT pàgina 99: 47% vs 6$	Yes		EPAR pàgina 106: reduccions de dosi per EA 42, 9%	Yes		EPAR,pàgina 136: 31,3% vs2,5%	Yes		EPAR pàgina 117: 50,3%, només reduccions de dosi.	Yes		EPAR, pàg 107: 52,1% vs. 49,1% (control).	Yes		IPT: ajust o interrupció:52,2% vs 71%	Yes		IPT: ajust o interrupció:52,2% vs 71%	No		Dosi única.	Dosage adjustment due to adverse effects	Mentioned	Mentioned	Yes		<2%	Yes			No			Not Relevant		Don't know!!!
Treatment discontinuation (due to AEs)	% Patients (observed)	The proportion of patients discontinuing treatment due to adverse events	0.15		Epar, pàgina 91: 15% vs. 2%.(control)	0.15		IPT: interrupcions del tractament: 7,5% vs 2,09% EPAR, pàgina 87: 155 vs. 3.0%	0.165		EPAR pàgina 100: 16,5% vs. 3,1%	0.068		IPT: 6,8 vs. 1,8% (control)	0.276		EPAR pàgina 121: 27,6 vs. 5,4%	0.189		EPAR pàgina 118: AE leading to discontinuation: versió actualitzada las 120 dies en població BRCAm. Per a la població de càncer d'ovari (377) va ser 18,6%	0.045		EPAR pàg 108: 4,5% vs 5,6% (control).	0.125		EPAR PÀGINA 118: 12,5 VS 14,1	0.125		EPAR PÀGINA 118: 12,5 VS 14,1	1.0%		Discontinuacoó del estudi. Dosi única.	Treatment discontinuation (due to AEs)	% Patients (observed)	The proportion of patients discontinuing treatment due to adverse events	0.031		Informe tècnic	0.189			0.215			0.019			0.313
Treatment discontinuation (due to AEs)	% Patients (difference)	The proportion of patients discontinuing treatment due to adverse events	0.13			0.12			0.134			0.05			0.222			_		No hi ha braç control	0.011			0.016			0.016			0.5%			Treatment discontinuation (due to AEs)	% Patients (difference)	The proportion of patients discontinuing treatment due to adverse events	0.018		Control group: 1,3%	0.105		Control arm 8,4%	0.079		Control group: 13,6%	0.003		Control group 1,6	0.24
Median duration of treatment	Months	Median and mean treatment duration	9 (median) and 11 (mean)	cycles	IPT i EPAR pàgina 90: exposició a niraparib 9 cicles de tractament de 28 dies. Mediana: 250 dias olaparob vs 163 dias placebo Mitjana: 299.9 dies vs 212.5 dies placebo	13.0 (median) and 11,8 (mean)	months	EPAR pàgina 85: mediana d'exposició al tractament amb ribo + letroxol és de 13 mesos. Exposició a ribociclib de 12.2 mesos. Mitja: 11,8 mesos ribociclib i 11,1 control	16	month	EPAR, pàgina 99: mediana de cicles rebut en el Monarch 3: 16 cicles, de 28 dies.	13 (median)	cycles	Epar pàgina 106: número de cicles rebuts: 13 vs 9 (control), que coincideix amb el nombre de mesos: 13 mesos vs 9 mesos (control).	11,6 (median) and 8,23 (mean)	months	EPAR mediana: 120 dies; 11,6 mesos vs 11,83 placbeo media: 8,23 vs 10,7 (placebo)	224 (median)	days	Pels pacients BRCA mutat. (Amb una o més línies prèvies de QT. Total pacients 143). Per a la població general 168 dies.	6,1 (median) and 8,4 (mean)	months	EPAR pàg 106: Mediana de 6,1 mesos vs. 3,9 mesos (control). Media: 8,4 vs. 4,5 mesos (control).	11,7 (median)	months	IPT: 11,7 mesos vs. 7,1 mesos per encora sol	11,7 (median)	months	IPT: 11,7 mesos vs. 7,1 mesos per encora sol	_		No aplica perqué és intervenció unica.	Median duration of treatment	Months	Median and mean treatment duration	34	days	EPAR IPT: 42 (2-576)	8.9	weeks		5.6	months	<1 a 45.3 months	62	days		12.14	weeks
Other Indications (patienties exposed)	# patients	Number of potential patients for indications . Use size of exposed population as reported in EPAR	854		EPAR pàgina 90: 854 pacients han rebut una dosi de niraparib: 367 pacients de l'estudi pivot en braç experimental (total pacients del pivot 546, braç experimental i control)	568		EPAR: PÀGINA 8: 568 pacients exposats a ribocilib a la dosi autoritzada. 381 exposats.	900		cancer de mama, tres estudis monarch. 488 de l'estudi monarch 3, 327 braç experimental	900		900 pacients han rebut abemaciclib en combinació amb teràpia hormoonal per cancer de mama, tres estudis monarch. 664 de l'estudi monarch 3, 441 braç experimental.	1710 pacients		"A total of 2079 patients have been exposed to neratinib monotherapy and 816 patients to neratinib combination therapy. 1710 patients were exposed with breast cancer at proposed dose " No s'especifica el número de pacients per cada estudi. Només s'especifica que el pivot representa el 82,3% dels pacients inclosos en l'avaluació de la seguretat.	409		EPAR pàgina 115: 409 van rebre la dosi autoritzada de rucaparib tant per càncer d'ovari com pàncrees. 377 pacients amb càncer d'ovari avançat, dels quals 143 amb BRCA+. 32 pacients tenien un cancer sòlid diferent a l'ovari.	494		EPAR, pàg 106: 494 pacients van rebre la dosi de talazoparib 1mg/dia, 286 de l'estudi pivot, amb 286 al braç experimental. 494 pacients de 11 estudis, però no especifica les indicacions.	1495		Epar pàgina 115-116: 1495 pacients exposats a encorafenib. Exposats a la dosi de 450mg un cop al dia i juntament amb binimetinib són: 274 (192 de la primera part de l'estudi pivot, 75 de l'estudi CLGX818X2109, i 7 pacients de l'estudi CMEK162X2110.	864		Epar pàgina 121: 864 pacients exposats a binimetinib (427 en monoteràpia i 437 combiant amb encorafenib). Fins a 2016: 2555 pacients han rebut almenys una dosi de binimetinib. 450 pacients va ser exposats a la dosi de 450mg un cop al dia i juntament amb binimetinib són pel tractament de melanoma metastàtic.	518		EPAR pàgina 100: 948 pacients tractats amb padeliporfina, 430 amb indicació de càncer de pròstata. 391 amb la dosi de la indicació	Other Indications (patienties exposed)	# patients	Number of potential patients for indications . Use size of exposed population as reported in EPAR	>1800			1207			542		at least one dose (EPAR)	403		403 received at least one dose	2747
Other Indications (number of indications)	# Indications	Number of indications	none		no altres indicacions aprovades	none		no altres indicacions aprovades	none		no altres indicacions aprovades	none		no altres indicacions aprovades			Estudiat en c- mama metastàtic, tot i que no té la indicació	none		no altres indicacions aprovades	none		no altres indicacions aprovades										Other Indications (number of indications)	# Indications	Number of indications	advanced solid tumours, chronic lymphocytic leukaemia, non-hodgkin's lymphoma, etc			NA			peripheral T-cell lymphomas		under study (EPAR)	unknown			NA
Comparative patient-perceived health / PRO																																	Comparative patient-perceived health / PRO
HRQoL	Score	Score; If absent, record absence	Not Identified		Pivot, material supplementari: EQ-5D-5L: consta el valor basal i també el valor al llarg dels cicles fins a post pregressió. Per cohorts separades segons la mutació BRCA, no hi ha dades del conjunt de la població			EPAR, pàgina 67: diferència entre grups al final de l'estudi, per l' EORTC QLQ-C30: -1.50 ( 95% CI: (-4.0, 1.0))	Diferència en el canvi respecte la basal, entre grups: -4,4 en perjudici a Abemaciclib		EPAR PÀGINA 58: EORTC QLQ-C30 global: diferència respecte la basal i entre grups:	-1.5		EPAR PÀGINA 79: EORTC QLQ-C30 global: diferència respecte la basal i entre grups (enperjudici a abemaciclib)	(FACT-B, −2·9 [95% CI −3·7 to −2·0]; EQ-5D, −2·7 [–3·7 to −1·7]).		Epar pàgina 95, parla de l'escala EQ-5D però no dóna valors concrets. Assaig pivot: The adjusted mean difference of changes in quality of life between the neratinib and placebo groups was greatest at month 1 for both measures (FACT-B, −2·9 [95% CI −3·7 to −2·0]; EQ-5D, −2·7 [–3·7 to −1·7]). Neither difference was deemed clinically important for the respective measures. After the first month, the …	Not identified		No s'identifiquen al IPT ni a l'EPAR; no van ser evaluades pel assaigs.	EORTC QLQ-C30: 8.4 [95% CI: 4.6, 12.3]; p<0.0001).		EPAR, pàgina 83: parla de l'escala EORTC QLQ-C30, peò no dona valors concrets. The difference between the 2 treatment arms in Global Health Status/QoL was 8.4 [95% CI: 4.6, 12.3]; p<0.0001). Based on interpretation from the 95% CIs, the overall change from baseline scores in Global Health Status/QoL was 3.0 [95% CI: 1.2, 4.8] within the talazoparib arm versus -5.4 [95% CI: -8.8, -2.0]) in the con…			EPAR. PÀGINA 95: The median time to definitive 10% deterioration in the QLQ-C30 global health status scores was longer in the Combo 450 arm compared with the Enco 300 arm (14.7 months [95% CI 9.2, 18.4]), with a HR for the difference of 0.45 (95% CI 0.31, 0.65)			EPAR. PÀGINA 95: The median time to definitive 10% deterioration in the QLQ-C30 global health status scores was longer in the Combo 450 arm compared with the Enco 300 arm (14.7 months [95% CI 9.2, 18.4]), with a HR for the difference of 0.45 (95% CI 0.31, 0.65)	0.7		EPAR pàgina 72: Canvi respecte la basal pel grup padeliporfina: -2,3 (-4,2 ; -0,4); respecte la vigilància activa: -3,0 (-5,0 ; -1,0). La diferència respecte la basal, entre grups és de 0,7 (-2,1 ; 3,4).	HRQoL	Score	Score; If absent, record absence	NA			0.8	EQ-5D		absence
Impact on Autonomy	(Y/N)	Disruption of daily activities due to delivering of treatment: delivered in hospital site, in-hospital admission, imparired activities of daily life..	No			No			No			No			No			No			No			Yes			Yes			Yes		Administració a l'hospital amb les 6h posteriors estant en penombra a l'hospital, precaució amb l'exposció a la llum durant les 48 posteriors	Impact on Autonomy	(Y/N)	Disruption of daily activities due to delivering of treatment: delivered in hospital site, in-hospital admission, imparired activities of daily life..	No			Yes			Yes		60 minutes infusion	Yes		90 minuts infusió intravenosa	Yes
Frequency of treatment (how often is administered)	time	Normal duration of use; dose adminsitration by unit of time. Frequency of treatment (i ex every 6 months or monthly). When multiple, worse guideline for the patient.	Once	Day	300 MG/ DAY (3 capsules de 100mg) en cicles de 28 dies.	Once	Day	600mg/dia per 21 dies, amb 7 dies de descans. Cicles de 28 dies.	Twice	Day	150mg dos cops al dia, continuat en cicles de 28 dies.	Twice	Day	150mg dos cops al dia, continuat en cicles de 28 dies.	Once	Day	240 mg un cop al dia	Twice	Day	600mg dos cops al dia, continuat	Once	Day	1mg/dia, continuat	Once	Day	Encorafenib 450mg/dia + Binimetinib 45mg/12h	Twice	Day	Encorafenib 450mg/dia + Binimetinib 45mg/12h	Other	Other	Dosi única de 3,66mg/kg	Frequency of treatment (how often is administered)	time	Normal duration of use; dose adminsitration by unit of time. Frequency of treatment (i ex every 6 months or monthly). When multiple, worse guideline for the patient.	Once	Day	del dia 8 al dia 21 de cada cicle de QT.	Other		Day 0, day 8 and day 15 /3-4 weeks (Between 2 or 6 cycles depending on the possibility of transplantation (First cycle 3 o 4 weeks, following cycles 4 weeks)).	Once	Week	Setmanal el primer cicle i cada dues setmanes el cicles següents fins a progressió o toxicitat	>2	Week	dia 1,3 i 5 fase inducció/ 1 i 3 segona inducció, 1 i 3 consolidació.	>2	week
Variable treatment guideline	(Y/N)	Identify if the treatment guideline changes	Other		No	No			No			No			No			No			No			No			No			No			Variable treatment guideline	(Y/N)	Identify if the treatment guideline changes		Day	en monoteràpia de manteniment fins a recaiguda en aquells pacients amb RC (fins a un màxim de 12 cicles)			Depends on the objective (trasplantation vs non-trasplantation)		2 Weeks			Week	Segona inducció i consolidació		week
Time of treatment	Fixed / Up to progression	Identify if the treatment includes a fixed number of cycles	Other		Up to progression	Up to progression			Up to progression			Up to progression			Fixed		un any de tractament	Up to progression			Up to progression			Up to progression			Up to progression			Fixed		Dosi única	Time of treatment	Fixed / Up to progression	Identify if the treatment includes a fixed number of cycles	Other		màxim 12 cicles en manteniment	Other		fixed but flexible depending on the response (between 2 or 3 cycles trasplantation or maximum of 6 cycles non trasplantation)	Other		up to progression	Other	Other	fixed (maxim 4 cicles, dos inducció i dos consolidació) or time to progression	Other
Easy to Use / Mode & Setting of Administration	Oral/Injection/intratechal	Type of formulation	Oral			Oral			Oral			Oral			Oral			Oral			Oral			Oral			Oral			Injection			Easy to Use / Mode & Setting of Administration	Oral/Injection/intratechal	Type of formulation	Oral			Intratechal			Injection			Injection			Injection
Combined chemotherapy	With/Without	Treatment includes combination with chemotherapy	Without			Without		Combinat amb inhibidors de l'aromatasa o fulvestrant	Without		combinat amb inhibidors de l'aromatasa o fulvestrant	Without		Combinat amb inhibidors de l'aromatasa o fulvestrant	Without			Without			Without			Without			Without			Without			Combined chemotherapy	With/Without	Treatment includes combination with chemotherapy	With			Without			Without			Without		its a combination itself	With
Magnitude of benefit: Type of preventive benefit																																	Magnitude of benefit: Type of preventive benefit
Magnitude of Clinical benefits MCBS	ESMO SCALE	MCBS defined by ESMO; If unavailable, calculate - if more than one trial, calculate for pivotal	3			3		Para l'assaig MONALEESA-2 (con letrazol)	3			4		4 en combinació amb fulvestrant i 3 en combinació amb inhibidor de l'aromatasa	A		Escala per tractaments curatius	3			4			4			4			Not evaluated		No consta	Magnitude of Clinical benefits MCBS	ESMO SCALE	MCBS defined by ESMO; If unavailable, calculate - if more than one trial, calculate for pivotal	A		form 1	4		form 2a	NA			NA			A
Magnitude of benefit: Type of therapeutic benefit																																	Magnitude of benefit: Type of therapeutic benefit
Curative/Non Curative	Curative / Non Curative	Curative: therapeutic intervention aimed to eradicate the disease; Non curative: unlikely to achieve tumour eradication,aimed to prolong survival and palliate symptoms.	Non Curative			Non Curative			Non Curative			Non Curative			Curative			Non Curative			Non Curative			Non Curative			Non Curative			Curative			Curative/Non Curative	Curative / Non Curative	Curative: therapeutic intervention aimed to eradicate the disease; Non curative: unlikely to achieve tumour eradication,aimed to prolong survival and palliate symptoms.	Non Curative			Non Curative			Non Curative			Non Curative
Comparative cost consequences – cost of intervention																																	Comparative cost consequences – cost of intervention
ICER (> NICE threshold)	(+,-) Cost/PFS (+,-)	Before any patients scheme in place	No		There is uncertanty when is compared with routine suveillance and is not cost effective cmpared with olaparib for the BRCAm population	No		< 30,000 £/QUALY	yes		No està disponible quan es combina amb els inhibidors de l'aromatasa. Combinat amb fulvestrant supera el límit acceptable, tot i el descompte confidencial.	yes		No està disponible quan es combina amb els inhibidors de l'aromatasa. Combinat amb fulvestrant supera el límit acceptable, tot i el descompte confidencial.	no		ICERs were presented as commercial in confidence to maintain the confidentiality of the proposed commercial agreement for neratinib, and therefore cannot be reported here. However, it agreed that the most plausible ICER is unlikely to exceed the range NICE normally considers an acceptable use of NHS resources.Possible acord comercial confidencial			No hi ha guidance de la NICE			No hi ha guidance de la NICE. Està en procés d'evaluació.			HI ha guidance, però no hi ha informació sobre els ICER: The committee saw in confidence the company's corrected base case and the ERG's preferred base case using the confidential patient access schemes for encorafenib and binimetinib and for dabrafenib with trametinib. It concluded that encorafenib with binimetinib is a cost-effective use of NHS resources and can be recommended for routine commi…			HI ha guidance, però no hi ha informació sobre els ICER: The committee saw in confidence the company's corrected base case and the ERG's preferred base case using the confidential patient access schemes for encorafenib and binimetinib and for dabrafenib with trametinib. It concluded that encorafenib with binimetinib is a cost-effective use of NHS resources and can be recommended for routine commi…	Yes		"Padeliporfin should not be recommended for use in the NHS for this indication, and that over-treatment of low-risk prostate cancer should be discouraged because it is unlikely to progress."	ICER (> NICE threshold)	(+,-) Cost/PFS (+,-)	Before any patients scheme in place	No		The company has a commercial arrangement. This makes midostaurin available to the NHS with a discount.	Yes		The company has a commercial arrangement. This makes inotuzumab ozogamicin available to the NHS with a discount.	Yes		The company has a commercial arrangement, which would have applied if the technology had been recommended.	Yes		he company has a commercial arrangement. This makes liposomal cytarabine–daunorubicin available to the NHS with a discount.	Yes
ICER (NICE cancer fund?)	(+,-) Cost/PFS (+,-)	Identify if NHS Cancer Fund in place	yes					Surt en un apartat diferent. NICE approved and baseline funded drugs/indications from 1st April 2016.			En combinació amb fulvestrant si, en combinació amb inh de l'aromatasa, està en una llista diferent:NICE approved and baseline funded drugs/indications from 1st April 2016			En combinació amb fulvestrant si, en combinació amb inh de l'aromatasa, està en una llista diferent			surt en una llista diferent.NICE approved and baseline funded drugs/indications from 1st April 2016			Només està el manteniment?			NO apareix al llistat.			surt a la llista NICE approved and baseline funded drugs/indications from 1st April 2016			surt a la llista NICE approved and baseline funded drugs/indications from 1st April 2016	No			ICER (NICE cancer fund?)	(+,-) Cost/PFS (+,-)	Identify if NHS Cancer Fund in place	No			No			No			No			No
ICER (NICE value)	(+,-) Cost/PFS (+,-)	Δmonthly target therapy cost / Δtime to disease progression. Estimate with the notified price and effectiveness of the reference treatment	20.694 £/QUALY per BRCA + 23,795 £/QUALY per BRCA -		remained within the range normally considered a cost-effective use of NHS resources es (that is, £20,000 to £30,000 per QALY gained) when the company incorporated more conservative assumptions for progression-free survival and overall survival. // For the germline mutation-negative‑2L+ group, the estimated ICERs incorporating the updated patient access scheme ranged from £23,795 (company) to £81,…	< 30,000 £/QALY		These ICERs were presented as commercial in confidence to maintain the confidentiality around the patient access scheme and therefore cannot be reported here.	50,687 £/QUALY 70,634 £/QUALY		A la guia del NICE consten diferents comparadors (https://www.nice.org.uk/guidance/ta579/resources/abemaciclib-with-fulvestrant-for-treating-hormone-receptorpositive-her2negative-advanced-breast-cancer-after-endocrine-therapy-pdf-82607151203269): agafo el valor quan es comparara amb fulvestran. El preu de la companya és de 50,687, el preu pel grup revisió de l'evidència és de 70,634	50,687 £/QUALY 70,634 £/QUALY		A la guia del NICE consten diferents comparadors (https://www.nice.org.uk/guidance/ta579/resources/abemaciclib-with-fulvestrant-for-treating-hormone-receptorpositive-her2negative-advanced-breast-cancer-after-endocrine-therapy-pdf-82607151203269): agafo el valor quan es comparara amb fulvestran. El preu de la companya és de 50,687, el preu pel grup revisió de l'evidència és de 70,634			No es disposa de les dades.			No hi ha guidance de la NICE			No hi ha guidance de la NICE			No es dispsoa de dades			No es dispsoa de dades				ICER (NICE value)	(+,-) Cost/PFS (+,-)	Δmonthly target therapy cost / Δtime to disease progression. Estimate with the notified price and effectiveness of the reference treatment (low to upper limit)	<£30.000/QALY			£33.749/QALY to £37.497/QALY			£33.043/QALY to £80.555/QALY			£45.055/QALY to £48.127/QALY			£31.709/QALY
Comparative cost consequences – other medical costs																																	Comparative cost consequences – other medical costs
Cost treatment (procedures and tests-physician visits-hospitalizations) / Year	Euros	Yearly direct medical costs excluding the purchasing costs of the technology (i) concomitant medications, ii) outpatient visits, diagnostic/laboratory tests, hospitalisations and other monitoring costs (including management AEs), and iii) terminal care. If published. Record if unavailable																															Cost treatment (procedures and tests-physician visits-hospitalizations) / Year	Euros	Yearly direct medical costs excluding the purchasing costs of the technology (i) concomitant medications, ii) outpatient visits, diagnostic/laboratory tests, hospitalisations and other monitoring costs (including management AEs), and iii) terminal care. If published. Record if unavailable	Not identified			Not identified			Not identified			Not identified			Not identified
Comparative cost consequences – non-medical costs																																	Comparative cost consequences – non-medical costs
Cost treatment / Year	Euros	Yearly non medical cost (not included in previous categories), if available - if unavailable, state.																															Cost treatment / Year	Euros	Yearly non medical cost (not included in previous categories), if available - if unavailable, state.	Not identified			Not identified			Not identified			Not identified			Not identified
Quality of evidence																																	Quality of evidence
ESMO	JADAD	JADAD (as in https://onlinelibrary.wiley.com/doi/pdf/10.1002/9780470988343.app1 )	4		Jadad 4,, en una publicació surt JADAD de 5. 1 aleatorizado + 1 aleatorización correcta + 1 cegamiento + 0 cegamiento correcto + 1 flow pacientes. El mètode de cegament no està especificat.	4		1 aleatorització + 1 bona aleatorizació + 1 cegament +0 bon cegament + 1 flow chart. No s'especifica el mètode de cegament.	4		No especifica com es fa el cegament	4		1 aleatorització + 1 bona aleatortització + 1 cegament + 0 bon cegament + 1 flow patients. No especifica com es fa el cegament	5		1 aletaorització + 1 aleatorització correcta) + 1 cegament + 1cegament correcte + 1 flow patients	0		És obert, d'un sol braç i a l'estar l'anàlisi integrat dels dos estudis no es detallen les pèrdues durant la inclusió.	3		1 aleatorització + 1 bona aleatorització + 0 cegament + 0 bon cegament + 1 patents flow. És un estudi obert.	3		1 aleatorització + 1 bona aleatorització + 0 cegament + 0 bon cegament + 1 patents flow. És un estudi obert.	3		open label study	3		1 aleatorizado + 1 aleatorización correcta + 0 cegamiento +0 cegamiento correcto + 1 flow pacientes	ESMO	JADAD	JADAD (as in https://onlinelibrary.wiley.com/doi/pdf/10.1002/9780470988343.app1 )	1A			2		JADAD	1		Blinding not appropiate	1			1
Expert consensus/clinical practice guidelines																																	Expert consensus/clinical practice guidelines
Recommendation by experts	International/ SEOM / Ad Hoc EC **	If available: International/ SEOM / Ad Hoc EC , at the time of pricing. Record if recommended, and grade of recommendation	Recommended (national)		No disponible: ICOPRAXIS de 2017, només dades d'olaparib. SEOM IPT: Niraparib está recomendado con un nivel 2A como tratamiento de mantenimiento en las pacientes con cáncer epitelial de ovario en recaída platino sensible y en respuesta al platino en las guías de las NCCN Versión 4.2017 SEOM actualizades a 2020 : Based on these results, olaparib (with or without bevacizumab) or niraparib after par…	Recommended (national)		ICOPRAXIS 2016, no surt. SEOM IPT: NCCN Guidelines versión 4.2017. Considera ribociclib + inhibidor de aromatasa como una opción en primera línea de tratamiento endocrino en mujeres con cáncer de mama avanzado/metastásico. Guies SEOM 2018--> recomana els inhibidors de les CDK4/6 en primera línia amb inh de l'aromatasa o fulvestrant. En recaiguda després de tractament hormonal, recomana inhibidors…	Not Recommended (national)		ICOPRAXIS 2016, no surt. IPT SEOM: no n'hi ha Guies SEOM 2018--> recomana els inhibidors de les CDK4/6 en primera línia amb inh de l'aromatasa o fulvestrant. En recaiguda després de tractament hormonal, recomana inhibidors de la CDK 4/6 amb fulvestrant de segona com a opció preferent. Guies ESMO: 2019-2020.	Not Recommended (national)		ICOPRAXIS 2016, no surt. IPT SEOM: no n'hi ha Guies SEOM 2018: recomana els inhibidors de les CDK4/6 en primera línia amb inh de l'aromatasa o fulvestrant. En recaiguda després de tractament hormonal, recomana inhibidors de la CDK 4/6 amb fulvestrant de segona com a opció preferent.	Recommended (national)		ICOPRAXIS 2016: NO SURT SEOM 2018: recomanació I-B de considerar neratinib com a opció de tractament després d'un any de tractament amb trastuzumab, en pacients amb nodes positius i RH positius. Esmo 2019: • Extended anti-HER2 therapy with neratinib may be considered in selected high-risk patients, not previously treated with dual blockade, and with appropriate diarrhoea prophylaxis and managemen…	Recommended (national)		IPT SEOM: no està avaluat NCCN: opció de tractament en recaiguda, tant per les pacients sensibles com resistents a platí, que hagin rebut 2L o més i que siguin BRCA+. Es prefereix l'opció en resisitents a platí donat que tenen menys opciosn terapèutiques. SEOM (2020): presenta rucaparib com una alternativa per a tractament en pacients que no pioden tolerar quimioterapia basada en platins.	Recommended (national)		IPT SEOM, 2019: NCCN 2019: El tratamiento en monoterapia con inhibidores del PARP (olaparib/ talazoparib) se considera una opción en las pacientes con mutación germinal BRCA1/2 con CMM Her2-RH+ tras toxicidad inaceptable ó progresión a tratamiento hormonal tras , al menos una primera línea de hormonoterapia con inhibidores de ciclina . En las pacientes con CMM HER2-RH- se considera una opción de …	Recommended (international)		ICOPRAXIS: no hi ha pauta pel melanoma. Guies SEOM 2020: els inhibidors de BRAF i MEK són una opció addicional a la 1aL de tractament del melanoma avançat. L'estàndard de tractament es considera la inmunoteràpia amb pembro monoteràpia, nivolumab monoteràpia o ipilimumab+nivolumab. O en 2aL després d'immuno. IPT seom: Las guías de ESMO 2015 y SEOM 2017, no recogen la combinación de encorafenib + b…	Recommended (international)		ICOPRAXIS: no hi ha pauta pel melanoma. Guies SEOM 2020: els inhibidors de BRAF i MEK són una opció addicional a la 1aL de tractament del melanoma avançat. L'estàndard de tractament es considera la mimunoteràpia amb pembro monoteràpia, nivolumab monoteràpia o ipilimumab+nivolumab. O en 2aL després d'immuno. IPT seom: Las guías de ESMO 2015 y SEOM 2017, no recogen la combinación de encorafenib + b…	NA		Icopraxis del càncer de pròstata del 2015. No consta Guies SEOM pròstata: 2021 No disposa a més de IPT de la seom ESMO 2020: no consta	Recommendation by experts	International/ SEOM / Ad Hoc EC **	If available: International/ SEOM / Ad Hoc EC , at the time of pricing. Record if recommended, and grade of recommendation	Recommeded (international)		NCCN - 2A	Recommended (international)		NCCN guidelines 1 o 2A (Ph+)	NA			Recommended (international)		NCCN: >60 anys - <60 anys 1 - 2B	NA
Contextual criteria																																	Contextual criteria
Mandate and scope of the healthcare system																																	Mandate and scope of the healthcare system
Included in Nationa/Sub-National Health Plan	Yes/No	Mentioned in Healthcare plans. If available at National or Sub National level	Included		Pla director d'oncologia 2017-2019: Estendre els procediments designats com a terciaris a d’altres que compleixen els criteris establerts com són els tumors de cap i coll, i la cirurgia del càncer d’ovari. Pla de Salut 2016-2020: Reordenació de la cirurgia d’ovari (cirurgia oncològica complexa)	Included		Pla contra el càncer a catalunya 2015-2020 i al Pla director d'oncologia 2017-2019: Millorar la qualitat del cribratge de càncer de mama, tot reduint‐ne la variabilitat, i instaurar un nou protocol de cribratge de càncer de coll uterí, d'acord amb el desenvolupament de l'evidència científica de les proves de cribratge. Pla de Salut 2016-2020: Reduir en un 10% la taxa de mortalitat per càncer de m…	Included		Pla contra el càncer a catalunya 2015-2020 i al Pla director d'oncologia 2017-2019: Millorar la qualitat del cribratge de càncer de mama, tot reduint‐ne la variabilitat, i instaurar un nou protocol de cribratge de càncer de coll uterí, d'acord amb el desenvolupament de l'evidència científica de les proves de cribratge. Pla de Salut 2016-2020: Reduir en un 10% la taxa de mortalitat per càncer de m…	Included		Pla contra el càncer a catalunya 2015-2020 i al Pla director d'oncologia 2017-2019: Millorar la qualitat del cribratge de càncer de mama, tot reduint‐ne la variabilitat, i instaurar un nou protocol de cribratge de càncer de coll uterí, d'acord amb el desenvolupament de l'evidència científica de les proves de cribratge. Pla de Salut 2016-2020: Reduir en un 10% la taxa de mortalitat per càncer de m…	Included		Pla contra el càncer a catalunya 2015-2020 i al Pla director d'oncologia 2017-2019: Millorar la qualitat del cribratge de càncer de mama, tot reduint‐ne la variabilitat, i instaurar un nou protocol de cribratge de càncer de coll uterí, d'acord amb el desenvolupament de l'evidència científica de les proves de cribratge. Pla de Salut 2016-2020: Reduir en un 10% la taxa de mortalitat per càncer de m…	Included		Pla director d'oncologia 2017-2019: Estendre els procediments designats com a terciaris a d’altres que compleixen els criteris establerts com són els tumors de cap i coll, i la cirurgia del càncer d’ovari. Pla de Salut 2016-2020: Reordenació de la cirurgia d’ovari (cirurgia oncològica complexa)	Included		Pla contra el càncer a catalunya 2015-2020 i al Pla director d'oncologia 2017-2019: Millorar la qualitat del cribratge de càncer de mama, tot reduint‐ne la variabilitat, i instaurar un nou protocol de cribratge de càncer de coll uterí, d'acord amb el desenvolupament de l'evidència científica de les proves de cribratge. Pla de Salut 2016-2020: Reduir en un 10% la taxa de mortalitat per càncer de m…	Included		Pla contra el càncer a catalunya 2015-2020 i Pla director d'oncologia 2017: Objectius de l'atenció oncològica de Catalunya: 6.4. Garantir l’accés dels pacients a un tractament oncològic de qualitat . Considerar la possibilitat de concentrar tractaments determinats amb quimioteràpics en tumors de baixa freqüència, com ha estat el cas del tractament del melanoma metastàtic.	Included		Pla contra el càncer a catalunya 2015-2020 i Pla director d'oncologia 2017: Objectius de l'atenció oncològica de Catalunya: 6.4. Garantir l’accés dels pacients a un tractament oncològic de qualitat . Considerar la possibilitat de concentrar tractaments determinats amb quimioteràpics en tumors de baixa freqüència, com ha estat el cas del tractament del melanoma metastàtic.	Included		Pla contra el càncer de catalunya 2015-2020, pàgina 21. També en el pla director d'oncologia 2017-2019. : Un dels aspectes més valorats pels pacients i els professionals d’atenció primària ha estat el Programa de diagnòstic ràpid del càncer en cas de sospita elevada de càncer. Aquest Programa inclou cinc càncers: de mama, còlon i recte, pulmó, pròstata i bufeta urinària	Included in Nationa/Sub-National Health Plan	Yes/No	Mentioned in Healthcare plans. If available at National or Sub National level	Included		Pla Salut de Catalunya 2016-2020. Prioritat. Objectiu: reduir en un 10% la mortalitat per càncer. Plan nacional de calidad 2010. Mejorar la atención con enfermedades prevalentes.	Included		Pla Salut de Catalunya 2016-2020. Prioritat. Objectiu: reduir en un 10% la mortalitat per càncer. Plan nacional de calidad 2010. Mejorar la atención con enfermedades prevalentes.	Not Included			Included		Pla Salut de Catalunya 2016-2020. Prioritat. Objectiu: reduir en un 10% la mortalitat per càncer. Plan nacional de calidad 2010. Mejorar la atención con enfermedades prevalentes.	Included
Population priorities and access																																	Population priorities and access
Preferences of the population as a need?	Describe	Search google for societal comments or events (marathons...)	Not identified			Not identified			Not identified			Not identified			Not identified			Not identified			Not identified			Not identified			Not identified			Not identified			Preferences of the population as a need?	Describe	Search google for societal comments or events (marathons...)	Not identified			Not identified			Not identified			Not identified			Not identified
Common goal and specific interests																																	Common goal and specific interests
Stakeholders expression of interest & alignement	Describe	Search google for patient & professional lobbying	Not identified			Not identified			Not identified			Not identified			Not identified			Not identified			Not identified			Not identified			Not identified			Not identified			Stakeholders expression of interest & alignement	Describe	Search google for patient & professional lobbying	Not identified			Not identified			Not identified			Not identified			Not identified
Environmental impact																																	Environmental impact
Impact of the intervention on environment - packaging, production	Yes/No	Any mention in EPAR?	yes		EPAR, pàgina 30: A PECSW has been calculated to above the action limit of 0.01 µg/L, thus a Phase II Tier A environmental fate and effects analysis is required. The environmental risk assessment for Zejula requires further investigations, and the Applicant is recommended to submit an updated ERA by the end of Q2 2018	No		EPAR, pàgina 25: Ribociclib is not a PBT substance. Considering the above data, ribociclib is not expected to pose a risk to the environment.	No		EPAR pàg 37: Abemaciclib is not a PBT substance. Considering the submitted data, abemaciclib is not expected to pose a significant risk to the environment.	No		EPAR pàg 37: Abemaciclib is not a PBT substance. Considering the submitted data, abemaciclib is not expected to pose a significant risk to the environment.			EPAR pàg 36: The environmental risk assessment provided with this application is considered incomplete by the CHMP as the following studies should have been conducted: OECD study 106, 307, 2016, 208, 207, 123 and 218, and study ISO 11267.			EPAR pàgina 35: the available data do not allow to conclude definitively on the potential risk of rucaparib to the environment. The applicant is recommended to perform the ERA phase II studies as follow-up meas	No		EPAR, PÀGINA 39: "talazoparib is not a PBT"	No		Epar pàgina 40: Therefore, encorafenib is not expected to pose a significant risk to the environment.	No		Epar pàgina 47: The environmental risk assessment indicates the proposed therapeutic use of binimetinib is not expected to pose a significant risk to the environment.	No		EPAR pàgina 30: padeliporfin di-potassium is not expected to pose a risk to the environment.	Impact of the intervention on environment - packaging, production	Yes/No	Any mention in EPAR?	Yes		Persistent bioaccumulative and toxic (potentially PBT)	No			No			No		The PECSURFACEWATER value is not above 0.01 μg/L for both drug substances, therefore, the phase II environmental-fate and effect analysis is not required.	No
System capacity and appropriate use of intervention																																	System capacity and appropriate use of intervention
Healtcare services delivery change	Yes/No/ Neutral	Implies change in service delivery (e.g. non-hopital outpatient); Requires inversion to deliver care (i ex: biomarkers, i ex whithe rooms for car-t)	No			No			No			No			No			Yes		Si, si considerem que les alterantives són quimioteràpia i per tant tot el procedimetn associat a l'administració és perd.	No		No, si considerem la millor alternativa l'olaparib. Sí, si considerem la QT.	Yes		Si considerem que és una alternativa a la quimio anterior que pogués haver-hi o a la immuno, aleshores té un impacte positiu, al tractar-se d'un tractament oral.	Yes		Si considerem que és una alternativa a la quimio anterior que pogués haver-hi o a la immuno, aleshores té un impacte positiu, al tractar-se d'un tractament oral.	Yes		Formació dels professionals que administren el tractament, ingrés <24h...	Healtcare services delivery change	Yes/No/ Neutral	Implies change in service delivery (e.g. non-hopital outpatient); Requires inversion to deliver care (i ex: biomarkers, i ex whithe rooms for car-t)	No			No			Yes		The medicine is given as an infusion (drip) into a vein lasting at least 1 hour vs vorinostat via oral	No			No
Political/historical/cultural context																																	Political/historical/cultural context
Societal acceptability of the decisions	Describe	Quantify and find -legal and social aspects in healthplans; examples: asbestus exposure; hemophilia and infection; antecedents of accidents or other	Not identified			Not identified						Not identified			Not identified						Not identified			Not identified			Not identified			Not identified			Societal acceptability of the decisions	Describe	Quantify and find -legal and social aspects in healthplans; examples: asbestus exposure; hemophilia and infection; antecedents of accidents or other	Not identified			Not identified			Not identified			Not identified			Not identified
																																	EPAR			https://www.ema.europa.eu/en/documents/assessment-report/rydapt-epar-public-assessment-report_en.pdf			https://www.ema.europa.eu/en/documents/assessment-report/besponsa-epar-public-assessment-report_en.pdf			https://www.ema.europa.eu/en/documents/assessment-report/poteligeo-epar-public-assessment-report_en.pdf			https://www.ema.europa.eu/en/documents/assessment-report/vyxeos-epar-public-assessment-report_en.pdf			https://www.ema.europa.eu/en/documents/assessment-report/mylotarg-epar-public-assessment-report_en.pdf
																																	IPT			https://www.aemps.gob.es/medicamentosUsoHumano/informesPublicos/docs/IPT-midostaurina-Rydapt-LMA.pdf			https://www.aemps.gob.es/medicamentosUsoHumano/informesPublicos/docs/IPT-inotuzumab-ozogamicina-Besponsa-LLA.pdf?x90995						https://www.aemps.gob.es/medicamentosUsoHumano/informesPublicos/docs/2021/IPT_10-2021-Vyxeos.pdf?x79299			https://www.aemps.gob.es/medicamentosUsoHumano/informesPublicos/docs/IPT-gemtuzumab-ozogamicina-Mylotarg-LMA.pdf?x42633
																																	Other												https://vyxeospro.com/nccn-recommendations/
																																	NICE			https://www.nice.org.uk/guidance/ta523/resources/midostaurin-for-untreated-acute-myeloid-leukaemia-pdf-82606838794693			https://www.nice.org.uk/guidance/ta541/resources/inotuzumab-ozogamicin-for-treating-relapsed-or-refractory-bcell-acute-lymphoblastic-leukaemia-pdf-82606956367813			https://www.nice.org.uk/guidance/gid-ta10305/documents/final-appraisal-determination-document			https://www.nice.org.uk/guidance/ta552/resources/liposomal-cytarabinedaunorubicin-for-untreated-acute-myeloid-leukaemia-pdf-82607018513605			https://www.nice.org.uk/guidance/ta545/resources/gemtuzumab-ozogamicin-for-untreated-acute-myeloid-leukaemia-pdf-82606963086277
[truncated: 29 more columns]

## Sheet: Product in rows
Criteria	Evaluator	Identification EPAR #	Product (active)	Product (Brand)	Indication (tumour)	considerations	Disease severity	Speed tumor growth	% Metastasized	Expected survival 5-years	Overall Survival	Physical function and general health (SF36 - EQ5D - eortc qlq-c30)	Size of affected population - priorise ESP data, if no EU, if no Other	Prevalence	Incidence	Unmet needs	Treatment options	Type of standard of care	Comparative effectiveness	Progression Free Survival	Progression Free Survival	Objective Response Rate (RECIST/MRD)	Objective Response Rate (RECIST/MRD)	Complete response (RECIST/MRD)	Complete response (RECIST/MRD)	Partial response (RECIST /MRD)	Partial response (RECIST /MRD)	Long responders	Overall Survival	Overall Survival	Comparative safety/tolerability	Any Advers Events	Any Advers Events	Non-Fatal Serious Advers Events (>3)	Non-Fatal Serious Advers Events (>3)	Fatal Advers Events (Grade 5 AEs)	Fatal Advers Events (Grade 5 AEs)	Dosage adjustment due to adverse effects	Treatment discontinuation (due to AEs)	Treatment discontinuation (due to AEs)	Median duration of treatment	Other Indications (patienties exposed)	Other Indications (number of indications)	Comparative patient-perceived health / PRO	HRQoL	Impact on Autonomy	Frequency of treatment (how often is administered)	Variable treatment guideline	Time of treatment
EPAR	GP/RV	5	Niraparib -2	Zejula	Ovarian cancer	Orphan designation				0.29	>24			42,9 / 100.000	7,5 / 100.000		with	Directed agents		11.3	6.6	Not evaluated	Not evaluated	Not evaluated	Not evaluated	Not evaluated	Not evaluated	Not mentioned	Not reached	_		1	0.04	0.74	0.51	0		Yes	0.15	0.13	9 (median) and 11 (mean)	854	none		Not Identified	No	Once	Other	Other
Database	GP/RV	5	Niraparib -2	Zejula	Ovarian cancer	Orphan designation	0	0	0	0.29	>24	0	0	42,9 / 100.000	7,5 / 100.000	0	with	Directed agents	0	11.3	6.6	Not evaluated	Not evaluated	Not evaluated	Not evaluated	Not evaluated	Not evaluated	Not mentioned	Not reached	_	0	1	0.04	0.74	0.51	0	0	Yes	0.15	0.13	9 (median) and 11 (mean)	854	none	0	Not Identified	No	Once	Other	Other
Unit	Of Time										months									months	months																				cycles						Day
Source / comments	Source / Comments	EMEA/H/C/004249/0000			C. de ovari- manteniment, no restringit per BRCA				IPT: 60-78% de les pacients debuten amb estadis III-IV.	IPT: 47% de supervivència global pel càncer d'ovari. Del 29% en estadi avançat, que és la indicació.	EPAR, pàgina 10: SG olaparib per BRCA germinal +: 34,9 mesos. Tot i que les portadores de mutacions BRCA tenen millor pronòstic (IPT niraparib).	Pivot, material supplementari: EQ-5D-5L: consta el valor basal i també el valor al llarg dels cicles fins a post pregressió. Per cohorts separades segons la mutació BRCA, no hi ha dades del conjunt de la població		IARC, prevalença càncer ovari en Espanya, ambdós sexes, 2020 a 5 anys ajustada per edat. 10204 casos	IARC, incidencia càncer ovari en Espanya, ambdós sexes, 2020. Incidencia crua 14,8 / 100.000 hab		Olaparib está finaciat en el moment d'evaluació per la mateixa indicació, però restringit a BRCAmutat.	Olaparib per BRCA germinal mutat.		11,3 vs 4,7 (control) per a tota la població del estudi (BRCAm y BRCAwt, que es la població de la inidcació)	IPT: HR: 0,38 (0,3 ; 0,48), p<0,0001	És tractament de manteniment	_	És tractament de manteniment	_	És tractament de manteniment	_	IPT pàgina 3: 44,4% exposat al tractament durant 12 mesos o més	IPT: HR: 0,73 (0,48 ; 1,12), p=0,1545	No aplica		100% vs. 96% (control)		EPAR, pàgina 91: grade 3-4: 74% vs 23% (control)		IPT: No se comunicaron muertes por EA durante el tratamiento, si bien, durante el seguimiento del estudio hubo 3 muertes por síndrome mielodisplásico o leucemia mieloide aguda (1 en el grupo de niraparib y 2 en el grupo placebo). 2 de las muertes (1 en cada grupo) fue en relación con la medicación a juicio del investigador.	No aplica	IPT: 67% van reduir la dosi en el grup niraparib. El 69% va interrompre el tractament. EPAR: pàgina 91: 69% reduccions de dosi, 67% interrupcions Pivot (material suplementari): 66,5%.	Epar, pàgina 91: 15% vs. 2%.(control)		IPT i EPAR pàgina 90: exposició a niraparib 9 cicles de tractament de 28 dies. Mediana: 250 dias olaparob vs 163 dias placebo Mitjana: 299.9 dies vs 212.5 dies placebo	EPAR pàgina 90: 854 pacients han rebut una dosi de niraparib: 367 pacients de l'estudi pivot en braç experimental (total pacients del pivot 546, braç experimental i control)	no altres indicacions aprovades		Pivot, material supplementari: EQ-5D-5L: consta el valor basal i també el valor al llarg dels cicles fins a post pregressió. Per cohorts separades segons la mutació BRCA, no hi ha dades del conjunt de la població		300 MG/ DAY (3 capsules de 100mg) en cicles de 28 dies.	No	Up to progression
EPAR	GP/RV	11	Ribociclib	Kisqali	Advanced breast cancer	centralized authorization		SLP abemaciclib vs SLP palbociclib		0.333333	>24	64.5		577,3 / 100.000	74,4/100.000 habitants		with	Directed agents		25.3	9.3	0.407	0.132	2.7%	0.6%	0.38	0.126	No mencionat	Not Reached	_		0.985	0.015	0.812	0.485	0.006	0.006	Yes	0.15	0.12	13.0 (median) and 11,8 (mean)	568	none			No	Once	No	Up to progression
Database	GP/RV	11	Ribociclib	Kisqali	Advanced breast cancer	centralized authorization	0	SLP abemaciclib vs SLP palbociclib	0	0.333333	>24	64.5	0	577,3 / 100.000	74,4/100.000 habitants	0	with	Directed agents	0	25.3	9.3	0.407	0.132	2.7%	0.6%	0.38	0.126	No mencionat	Not Reached	_	0	0.985	0.015	0.812	0.485	0.006	0.006	Yes	0.15	0.12	13.0 (median) and 11,8 (mean)	568	none	0	0	No	Once	No	Up to progression
Unit	Of Time										months			5 years	1 year					months	months																				months						Day
Source / comments	Source / Comments	EMEA/H/C/004213/0000			C. de mama avançat, RH+, HER2-, combinat amb inh de l'aromatasa			SLP és de 10 a 20 mesos, depenenet del volumen mestatàtic i localització. IPT, pàg 1.	IPT: 5% dels cancers de mama diagnosticats són metastàtics	IPT, pàg 1. Segons l'EPAR, pàgina 8: supervivència a 5 anys del 25% pel c. Mama metastàtic.	epar pàgina 8: mediana de supervivènvia global pels RH+/HER2-: 2,5-4 anys.	EPAR pàgina 67: EORTC QLQ-C30: dades basals: (64.5 [20.25]) intervenció VS 64 [21.07] control)		IARC, prevalença càncer de mama, a 5 anys, ajustada per edat.	IPT: 201, 32825 casos nou de càncer de mama. 74,4 per cada 100.000 habitants. IARC: 77,5/100000 habitants incidència ajustada per edat.2020. La tasa crua és 143,4 / 100.000			Palbociclib o abemaciclib combinats amb un inhibidor de l'aromatasa. Teràpia hormonal amb inhibidors de l'aromatasa i fulvestrant.		Seguiment de 24 mesos: 25,3 vs. 16,0 IPT, monaleesa 2	HR 0,568 (0,457 ; 0,704), p= 9,63 x10-8	EPAR, página 66: hi ha dades més actualitzades:Taxa de resposta global: 42,5 vs 28,7%. Però no desglosa el % de RC o RP. S'agafen les dades prèvies del pivot, ja que els % tampoc varien massa més: 40,7% vs. 27,5%.		PIVOt: 2,7% vs2.1%		Pivot: 38.0% vs. 25,4%		EPAR, pàgina 86: 58,1% exposats durant més de 12 mesos al grup experimental. 13,2% més de 18 mesos.	EPAR, pàgina 65: No assolida vs. 33.0 mesos. HR : 0,746 (0,517 ; 1,078) IPT: dades immadures, 15% d'esdeveniments pel grup intervenció	No aplica		EPAR, pàgina 87: 98,5% vs. 97,0% (control)		IPT: EA grau 3-4: 81,2% vs. 32,7% (control)		EPAR, pàgina 87: morts: 6,9% (23) vs. 5.8% (19). Durant el tractament 0.9% (3) vs. 0.3% (1). Pàgina 98: morts ambEA com a ppal causa: 0,6% (2) intervenció vs 0 grup placebo		IPT: reduccions de dosi: 50,6% vs. 4,2% EPAR, pàgina 87: EA que van requerir interrupcions o reduccions e dosi: 73,1% vs. 15,8%	IPT: interrupcions del tractament: 7,5% vs 2,09% EPAR, pàgina 87: 155 vs. 3.0%		EPAR pàgina 85: mediana d'exposició al tractament amb ribo + letroxol és de 13 mesos. Exposició a ribociclib de 12.2 mesos. Mitja: 11,8 mesos ribociclib i 11,1 control	EPAR: PÀGINA 8: 568 pacients exposats a ribocilib a la dosi autoritzada. 381 exposats.	no altres indicacions aprovades		EPAR, pàgina 67: diferència entre grups al final de l'estudi, per l' EORTC QLQ-C30: -1.50 ( 95% CI: (-4.0, 1.0))		600mg/dia per 21 dies, amb 7 dies de descans. Cicles de 28 dies.
EPAR	GP/RV	38	Abemaciclib	Verzenios	Advanced breast cancer	centralized authorization		SLP ribociclib SLP palbo en 2ª línea		0.25	>24	65		577,3 / 100.000	74,4/100.000		with	Directed agents		28	13	0.497	13.3%	0.027	0.021	0.47	0.106	No mencionat	NA	NA		0.945	0.38	0.514	0.446	0.024	0.012	Yes	0.165	0.134	16	900	none		Diferència en el canvi respecte la basal, entre grups: -4,4 en perjudici a Abemaciclib	No	Twice	No	Up to progression
Database	GP/RV	38	Abemaciclib	Verzenios	Advanced breast cancer	centralized authorization	0	SLP ribociclib SLP palbo en 2ª línea	0	0.25	>24	65	0	577,3 / 100.000	74,4/100.000	0	with	Directed agents	0	28	13	0.497	13.3%	0.027	0.021	0.47	0.106	No mencionat	NA	NA	0	0.945	0.38	0.514	0.446	0.024	0.012	Yes	0.165	0.134	16	900	none	0	Diferència en el canvi respecte la basal, entre grups: -4,4 en perjudici a Abemaciclib	No	Twice	No	Up to progression
Unit	Of Time										months			5 years	1 year					month	month																				month						Day
Source / comments	Source / Comments	EMEA/H/C/004302/0000			C. de mama, avançat, RH+. HER2- combinat amb hormonoteràpia en primera L o posteriors				IPT: 5% dels cancers de mama diagnosticats són metastàtics	EPAR, pàgina 10: supervivència als 5 anys del c. Mama metastàtic del 25%	EPAR, pàgina 10: mediana de supervivènvia global pels RH+/HER2-: 2,5-4 anys.	EPAR, pàgina 68: EORTC QLQ-C30: 65 experimental vs. 59 el grup placebo.		IARC, prevalença càncer de mama, a 5 anys, ajustada per edat.	IPT: 201, 32825 casos nou de càncer de mama. 74,4 per cada 100.000 habitants. IARC: 77,5/100000 habitants incidència ajustada per edat.2020. La tasa crua és 143,4 / 100.000 Segons l'EPAR pàgina 9: incidència cancer de mama europa 2012: 94.2/100 000			Palbociclib i ribociclib en primera línia. IPT i EPAR: Palbociclib en segona línia o en pacients prèviament tractades amb teràpia hormonal, fulvestrant, o qt, o la combinació exemestano + everolimus		IPT, Pel Monarch 3 : 28 mesos vs 15 mesos HR: 0,54 (0,41 ; 0,72)		EPAR, pàgina 67: 49,7 vs. 36.45. Segons el protocol d'estudi, mesurat per RECIST (https://www.clinicaltrials.gov/ProvidedDocs/21/NCT02246621/Prot_003.pdf)		IPT: RC 2,7 vs 0,6%		IPT:RP: 47, 0 vs 36,4 pel monarch 3.			No assolida IPT: monarch 3: HR: 1,05 (0,68 ; 1,63)	No aplica		IPT: 94,5% vs. 56,5% EPAR: pàgina 100: 98,8% vs. 94,4%		ipt grau 3 o mes: 51,4% vs. 6,8% EPAR, pàgina 100: 61,8 vs. 26,1%		EPAR, pàgina 100: 2, 4% (8) vs. 1.2 (2) . Pàgina 102: Morts totals durant el tt i en els 30 dies posteriors van ser 15 en el grup experimental, 11 d'elles degudes a EA. No surten les de placebo.		IPT pàgina 99: 47% vs 6$	EPAR pàgina 100: 16,5% vs. 3,1%		EPAR, pàgina 99: mediana de cicles rebut en el Monarch 3: 16 cicles, de 28 dies.	cancer de mama, tres estudis monarch. 488 de l'estudi monarch 3, 327 braç experimental	no altres indicacions aprovades		EPAR PÀGINA 58: EORTC QLQ-C30 global: diferència respecte la basal i entre grups:		150mg dos cops al dia, continuat en cicles de 28 dies.
EPAR	GP/RV	38 (dup)	Abemaciclib (duplicat)	Verzenios (duplicat)	Advanced breast cancer	centralized authorization				0.25	>24	64		577,3 / 100.000	74,4/100.000		with	Others		16.9	7.6	0.352	0.191	0.031	0.027	0.321	0.164	Not mentioned	46.7	0.094		0.986	0.094	0.626	0.388	0.014	0.01	Yes	0.068	0.05	13 (median)	900	none		-1.5	No	Twice	No	Up to progression
Unit	Of Time										months			5 years	1 year					months	months								month	month											cycles						Day
Source / comments	Source / Comments	EMEA/H/C/004302/0000			C. de mama, avançat, RH+. HER2- combinat amb hormonoteràpia en primera L o posteriors				IPT: 5% dels cancers de mama diagnosticats són metastàtics	EPAR pàgina 10: supervivència als 5 anys del c. Mama metastàtic del 25%	EPAR, pàgina 10: mediana de supervivènvia global pels RH+/HER2-: 2,5-4 anys.	EPAR: pàgina 79: EORTC QLQ-C30: 64 en els dos grups		IARC, prevalença càncer de mama, a 5 anys, ajustada per edat.	IPT: 201, 32825 casos nou de càncer de mama. 74,4 per cada 100.000 habitants. IARC: 77,5/100000 habitants incidència ajustada per edat.2020. La tasa crua és 143,4 / 100.000 Segons l'EPAR pàgina 9: incidència cancer de mama europa 2012: 94.2/100 000			Palbociclib i ribociclib en primera línia. IPT i EPAR: Palbociclib en segona línia o en pacients prèviament tractades amb teràpia hormonal, fulvestrant, o quimioteràpia, o la combinació exemestano + everolimus		IPT Monarch 2 anàlisi final de SLP: 16,9 mesos vs. 9,3mesos (control)	HR:0,553 (0,449 ; 0,681)	IPT: Pel Monarch 2, la TRO va ser de 35,2 VS. 16,1 (control) Segons el protocol de l'estudi, mesurat per RECIST (https://www.clinicaltrials.gov/ProvidedDocs/03/NCT02107703/Prot_004.pdf)	EPAR: pàgina 79: 3,1 vs 0,4% (control)			EPAR pàina 79: 32,1 vs. 15,7			IPT i EPAR (pàgina 87). dades en el punt de tall: NA vs. NA, dades de juny de 2019: Pel Monarch 2: 46,7 mesos vs. 37,3 mesos.	HR 0,854 ( 0,598 ;1,221) p=0,389		EPAR, pàgina 107: 98,6% vs. 89,2% (control)		ipt: grau 3-4: 62,6% vs. 23,8% (control)		IPT: 7 vs. 2 EPAR: 1,4%(6) vs. 0,4% (1). Es mostren les de l'epar que hi ha el número concret.		EPAR pàgina 106: reduccions de dosi per EA 42, 9%	IPT: 6,8 vs. 1,8% (control)		Epar pàgina 106: número de cicles rebuts: 13 vs 9 (control), que coincideix amb el nombre de mesos: 13 mesos vs 9 mesos (control).	900 pacients han rebut abemaciclib en combinació amb teràpia hormoonal per cancer de mama, tres estudis monarch. 664 de l'estudi monarch 3, 441 braç experimental.	no altres indicacions aprovades		EPAR PÀGINA 79: EORTC QLQ-C30 global: diferència respecte la basal i entre grups (enperjudici a abemaciclib)		150mg dos cops al dia, continuat en cicles de 28 dies.
EPAR	GP/RV	45	Neratinib	Nerlynx	Breast cancer	centralized authorization		91,9 control del pivotal		0.7	Not identified	FACT-B total score: 114.4 (16.0) Nera EQ-5D index: 0.86 (0.16) Nerat EQ-5D health state: 81.5 (13.2) Nera	20 or 25% of entire breast cancer population re HER2+	577,3 / 100.000	74,4/100.000		with	Directed agents		0.942	0.023		Not evaluated	Not evaluated	Not evaluated	Not evaluated	Not evaluated	Not identified	Not reached			0.985	0.104	0.497	0.366	0.001	0	Yes	0.276	0.222	11,6 (median) and 8,23 (mean)	1710 pacients			(FACT-B, −2·9 [95% CI −3·7 to −2·0]; EQ-5D, −2·7 [–3·7 to −1·7]).	No	Once	No	Fixed
Database	GP/RV	45	Neratinib	Nerlynx	Breast cancer	centralized authorization	0	91,9 control del pivotal	0	0.7	Not identified	FACT-B total score: 114.4 (16.0) Nera EQ-5D index: 0.86 (0.16) Nerat EQ-5D health state: 81.5 (13.2) Nera	20 or 25% of entire breast cancer population re HER2+	577,3 / 100.000	74,4/100.000	0	with	Directed agents	0	0.942	0.023	0	Not evaluated	Not evaluated	Not evaluated	Not evaluated	Not evaluated	Not identified	Not reached	0	0	0.985	0.104	0.497	0.366	0.001	0	Yes	0.276	0.222	11,6 (median) and 8,23 (mean)	1710 pacients	0	0	(FACT-B, −2·9 [95% CI −3·7 to −2·0]; EQ-5D, −2·7 [–3·7 to −1·7]).	No	Once	No	Fixed
Unit	Of Time											Mean (SD)		5 years	1 year																										months						Day
Source / comments	Source / Comments	EMEA/H/C/004030/0000			C. de mama, HR (+) i HER2 (+)					EPAR pàg 9: SG a los 10 años de 70% en Europa. 83% malaltia local, 62% malaltia regional.		FACT-B total score: 114.4 (16.0) Neratinib vs 114.4 (16.1) Placebo EQ-5D index: 0.86 (0.16) Neratinib vs 0.86 ( 0.18) placebo EQ-5D health state: 81.5 (13.2) Nera vs 81.6 (13.4) placebo Dels anexes de l'assaig pivotal.	~EPAR (9)	IARC, prevalença càncer de mama, a 5 anys, ajustada per edat.	IPT: 201, 32825 casos nou de càncer de mama. 74,4 per cada 100.000 habitants. IARC: 77,5/100000 habitants incidència ajustada per edat.2020. La tasa crua és 143,4 / 100.000 Segons l'EPAR pàgina 9: incidència cancer de mama europa 2012: 94.2/100 000		El tractament estàndard seria tractament hormonal, però cap fàrmac ha sigut aprovat per a la indicació de tractament adjuvant perllongat.	Inhibidors de l'aromatasa o tamoxife durant 5 anys com a adjuvància, després d'un any de trastuzumab.		Variable: supervivència lliure de malaltia invasiva: taxa de pacients amb esdeveniment. EPAR, pàgina 86: 94,2% vs 91.9 % HR 0,66 (0,49 ; 0,90)	% de pacients	No s'avalua a l'estudi principal. A l'EPAR, pàg 112, hi ha un estudi de suport amb dades de TRO. No he trobat si són segons RECIST,.... TRO global del 25,4%. En pacients que han rebut tractament amb trastuzumab prèviament la resposta és similar a la global, tant expresin receptors hormals com no, mentre que sense tractament previ amb trastuzumab, la TRO és més alta, del 61%							EPAR pàg 112:An OS analysis has not been conducted because the required number of deaths has not been reached.			EPAR, pàgina 121: 98,5 vs. 88,1% (control)		grau 3-4: EPAR, pàgina 121: 49,7% vs. 13,1% (control)		EPAR, pàgina 124- 125: 2 morts al grup neratinib i una al grup placebo (0,1 vs 0.1)		EPAR,pàgina 136: 31,3% vs2,5%	EPAR pàgina 121: 27,6 vs. 5,4%		EPAR mediana: 120 dies; 11,6 mesos vs 11,83 placbeo media: 8,23 vs 10,7 (placebo)	"A total of 2079 patients have been exposed to neratinib monotherapy and 816 patients to neratinib combination therapy. 1710 patients were exposed with breast cancer at proposed dose " No s'especifica el número de pacients per cada estudi. Només s'especifica que el pivot representa el 82,3% dels pacients inclosos en l'avaluació de la seguretat.	Estudiat en c- mama metastàtic, tot i que no té la indicació		Epar pàgina 95, parla de l'escala EQ-5D però no dóna valors concrets. Assaig pivot: The adjusted mean difference of changes in quality of life between the neratinib and placebo groups was greatest at month 1 for both measures (FACT-B, −2·9 [95% CI −3·7 to −2·0]; EQ-5D, −2·7 [–3·7 to −1·7]). Neither difference was deemed clinically important for the respective measures. After the first month, the …		240 mg un cop al dia		un any de tractament
EPAR	GP/RV	52	Rucaparib	Rubraca	Advanced breast cancer	Conditional approval		13.6		0.3	Not identified	Not identified		42,9 / 100.000	7,5 / 100.000		with	Chemotherapy		10	_	0.717	_	0.085	_	0.462	_	Not mentioned	Not reached			1	_	0.671	_	0.042	_	Yes	0.189	_	224 (median)	409	none		Not identified	No	Twice	No	Up to progression
Database	GP/RV	52	Rucaparib	Rubraca	Advanced breast cancer	Conditional approval	0	13.6	0	0.3	Not identified	Not identified	0	42,9 / 100.000	7,5 / 100.000	0	with	Chemotherapy	0	10	_	0.717	_	0.085	_	0.462	_	Not mentioned	Not reached	0	0	1	_	0.671	_	0.042	_	Yes	0.189	_	224 (median)	409	none	0	Not identified	No	Twice	No	Up to progression
Unit	Of Time							months												months																					days						Day
Source / comments	Source / Comments	EMEA/H/C/004272/0000			C. Ovari BRCA +, 3a Linea (tractament)			IPT: DLP + trabectIdina mostra una SLP de 7,3 mesos pacients amb c. Ovari tractades amb un únic règim de QT basat en platí. 9,2 mesos per les pacients sensibles a platí i de 13, 6 mesos pels BRCA mutats (anàlisi retrospectiu).	60-70% són diagnosticats en etpaes avançades (III-IV)	IPT: SG a 5 anys és del 47%, i disminueix al 29% en estadi avançat. EPAR: Advanced stage disease is associated with a 5-year survival rate of only 30% to 40%.				IARC, prevalença càncer ovari en Espanya, ambdós sexes, 2020 a 5 anys ajustada per edat. 10204 casos	IARC, incidencia càncer ovari en Espanya, ambdós sexes, 2020. Incidencia crua 14,8 / 100.000 hab			IPT: no hi ha tractaments autoritzats específicament per la tercera línia o posteriors.Tot i que es proposa com alternativa la Doxorubicina liposomal, pegilada (DLP) ,el topotecan, trabectedina i DLP o trabectedina + paclitaxel		IPT: No hi ha comparador: 289 dies EPAR, pàg 90: 10 mesos (7,1 ; 12,5)	No hi ha braç control	IPT: només hi ha una cohort: 71,7% confirmada per RECIST segons l'investigador, que és la varibale principal de l'estudi conjunt. EPAR pàgina 87: ORR per la població global confirmada per RECIST per un comitè independent 44,3%, 7,5% de RC i 36,8% de RP.	No hi ha braç control	No està basat en criteris RECIST	No hi ha braç control	No està basat en criteris RECIST	No hi ha braç control	Durada de la resposta de 9,6 mesos. El 69, 2% recibió más de 6 meses de tratamiento. 25% de las pacientes BRCAm recibió más de 12 meses de tratamiento. EPAR. Pàg 115.	No assolida. Pàgina 99 EPAR: NA (21,7 ; NA)	no aplica		EPAR, pàgnina 118: pels 143 pacients amb BRCA mutat, la versió actualitzada . No coincideix amb els 106 de la població d'eficàcia, perqué els 37 restants van rebre solament 1 linea de quimio prèvia i no complien el criteri de la indicació. Para la població amb càncer d'ovari en general ( 377) va ser del 100%	No hi ha braç control	EPAR pàgina 118: AE grau 3-4 versió actualitzada las 120 dies en població BRCAm. Per a l apoblació de càncer d'ovari (377) va ser 62,6%	No hi ha braç control	EPAR pàgina 118: AE with outcome of death versió actualitzada las 120 dies en població BRCAm. Per a la població de càncer d'ovari (377) va ser 2,7%	No hi ha braç control	EPAR pàgina 117: 50,3%, només reduccions de dosi.	EPAR pàgina 118: AE leading to discontinuation: versió actualitzada las 120 dies en població BRCAm. Per a la població de càncer d'ovari (377) va ser 18,6%	No hi ha braç control	Pels pacients BRCA mutat. (Amb una o més línies prèvies de QT. Total pacients 143). Per a la població general 168 dies.	EPAR pàgina 115: 409 van rebre la dosi autoritzada de rucaparib tant per càncer d'ovari com pàncrees. 377 pacients amb càncer d'ovari avançat, dels quals 143 amb BRCA+. 32 pacients tenien un cancer sòlid diferent a l'ovari.	no altres indicacions aprovades		No s'identifiquen al IPT ni a l'EPAR; no van ser evaluades pel assaigs.		600mg dos cops al dia, continuat
EPAR	GP/RV	73	Talazoparib	Talzenna	Advanced breast cancer			SLP olaparib: 19,3			12 to 24	61.9	5-10% of breast cancers are associated with mutations in BRCA	577,3 / 100.000	74,4/100.000		with	Directed agents		8.6	3	0.626	0.354	5,5,%	0.055	0.571	0.299	Not mentioned	22.3	2.8		0.986	0.01	0.675	0.04	0.021	0.011	Yes	0.045	0.011	6,1 (median) and 8,4 (mean)	494	none		EORTC QLQ-C30: 8.4 [95% CI: 4.6, 12.3]; p<0.0001).	No	Once	No	Up to progression
Database	GP/RV	73	Talazoparib	Talzenna	Advanced breast cancer	0	0	SLP olaparib: 19,3	0	0	12 to 24	61.9	5-10% of breast cancers are associated with mutations in BRCA	577,3 / 100.000	74,4/100.000	0	with	Directed agents	0	8.6	3	0.626	0.354	5,5,%	0.055	0.571	0.299	Not mentioned	22.3	2.8	0	0.986	0.01	0.675	0.04	0.021	0.011	Yes	0.045	0.011	6,1 (median) and 8,4 (mean)	494	none	0	EORTC QLQ-C30: 8.4 [95% CI: 4.6, 12.3]; p<0.0001).	No	Once	No	Up to progression
Unit	Of Time							months			months			5 years	1 year					months	months								months	months											months						Day
Source / comments	Source / Comments	EMEA/H/C/004674/0000			C. Mama avançat, BRCA+, HER 2-, en 2a linea			Olaparib es considera la millor alternativa.			Estudi pivot d'olaparib olimpi AD: SG de 19, 3 mesos. Olaparib es considera la millor alternativa	EPAR, pàgina 83: EORTC-QLQ-c30, BASAL: 61.9 [95% CI: 59.0, 64.7] vs 60.9 [95% CI: 56.9, 64.9]	EPAR, pàg 10	IARC, prevalença càncer de mama, a 5 anys, ajustada per edat.	IPT: 201, 32825 casos nou de càncer de mama. 74,4 per cada 100.000 habitants. IARC: 77,5/100000 habitants incidència ajustada per edat.2020. La tasa crua és 143,4 / 100.000 Segons l'EPAR pàgina 9: incidència cancer de mama europa 2012: 94.2/100 000			EPAR pàgina 12: olaparib, capecitabina, eribulinai quimioteràpia basada en platí.		EPAR, pàg 79: 8,6 vs. 5,6 (control)	HR 0,542 (0,413 ; 0,711) p<0,0001	EPAR, pàgina 81-82.Dades no confirmades pel comitè independent, ja que no era un criteri necessari: 62,6% vs 27,2 % (control) Dades confirmades pel comitè independent: 50,2% vs 18,45 (control)		EPAR, pàgina 82. Dades no confirmades pel comitè independent, ja que no era un criteri necessari: 5,5% vs. 0% (control). Dades confirmades pel comité indpendent: 5,5% vs 0% (control)		EPAR, pàgina 82, dades no confirmades pel comitè independent, ja que no era un criteri necessari: 57,1 vs 27,2 (control) Dades confirmades pel comitè: 44,7% vs 18.4% (control)		EPAR, pàg 106: 18,5% dels pacients van estar exposats al tractament igual o més de 12 mesos.	EPAR, pàg 81-82: 22,3 mesos vs. 19,5 (control)	HR: 0,861 (0,547 ; 1,060)		EPAR, pàg 108: 98,6 vs. 97,6% (control)		EPAR, pàgina 108: grau 3 o 4: 67,5% vs 63,5% (control)		EPAR, pàg 108: 2,1% vs 3,2% (control).		EPAR, pàg 107: 52,1% vs. 49,1% (control).	EPAR pàg 108: 4,5% vs 5,6% (control).		EPAR pàg 106: Mediana de 6,1 mesos vs. 3,9 mesos (control). Media: 8,4 vs. 4,5 mesos (control).	EPAR, pàg 106: 494 pacients van rebre la dosi de talazoparib 1mg/dia, 286 de l'estudi pivot, amb 286 al braç experimental. 494 pacients de 11 estudis, però no especifica les indicacions.	no altres indicacions aprovades		EPAR, pàgina 83: parla de l'escala EORTC QLQ-C30, peò no dona valors concrets. The difference between the 2 treatment arms in Global Health Status/QoL was 8.4 [95% CI: 4.6, 12.3]; p<0.0001). Based on interpretation from the 95% CIs, the overall change from baseline scores in Global Health Status/QoL was 3.0 [95% CI: 1.2, 4.8] within the talazoparib arm versus -5.4 [95% CI: -8.8, -2.0]) in the con…		1mg/dia, continuat
EPAR	GP/RV	35	Encorafenib	Braftovi	Advanced melanoma	centralized authorization		SLP vemura/cobimetinib: 12,3	10-20%	0.17	22-26	66.72			8/100.000		with	Directed agents		14.9	5.3	0.63	0.125	0.08	0.03	0.55	0.1		33.6	10.1		0.989	0.006	0.578	0.095	0.102	0.028	Yes	0.125	0.016	11,7 (median)					Yes	Once	No	Up to progression
Database	GP/RV	35	Encorafenib	Braftovi	Advanced melanoma	centralized authorization	0	SLP vemura/cobimetinib: 12,3	10-20%	0.17	22-26	66.72	0	0	8/100.000	0	with	Directed agents	0	14.9	5.3	0.63	0.125	0.08	0.03	0.55	0.1	0	33.6	10.1	0	0.989	0.006	0.578	0.095	0.102	0.028	Yes	0.125	0.016	11,7 (median)	0	0	0	0	Yes	Once	No	Up to progression
Unit	Of Time							months			months									month									months												months						Day
Source / comments	Source / Comments	EMEA/H/C/004580/0000			Melanoma, avançat.			IPT cobimetinib. Mirar EPAR para la combinació dabra/trame, la variable principal és taxa relapsed free survival (mediana no assolida) Pembro: SLP // Relapse free survival: dabrafenib/trametinib. 40% SLP pembro: administrado cada 3 semanas (4,1, median) SLP nibo: 6,9	EPAR, pàgina 9: 10-20% són metastàtics	EPAR, pàgina 9-10: supervivència a 10 anys, del 75-85%. Supervivència a 5 anys, 17%. Si no es tracta:6-9 mesos	EPAR, pàgina 10-11: amb els inhibidors de BRAF i Mek, SG de 22-26 mesos en melanoma metastàtic, BRAF mutat.	EPAR pàgina 95: basal: EORTC QLQ-C30		IARC: Prevalença a 5 anys, en 2020, 42/100.000	EPAR, pàg9: 123,135 nous casos al 2012, a Europa. A les zones mediterrànies, la icnidència varia entre el 3-5/100.000 casos a l'any. IPT: Incidència a Espanya: 8/100.000, dels quals un 2% en estadis avançats. Iarc: incidència ajustada per edat melanoma 2020: 6,8/100.000. La incidència crua és de 12,3/100.000			IPT: inhibidor BRAF y un inhibidor MEK o la inmunoterapia con anti-PD1 (nivolumab o pembrolizumab). EPAR PÀGINA 10-11: Vemurafenib/cobimetinib, dabrafenib/trametinib		IPT: encora/binimetinib 14,9 nesis vs. 9,6 mesos HR: 0,75 (0,56 ; 1,00), p=0,051		IPT: RECIST, per revisió central: 63% vs. 50,5 per encorafenib en monoteràpia		8% vs 5%		55% vs. 45%			EPAR pàgina 91: 33,6 vs 23,5 HR 0,81 (0,61 ; 1,06), p = 0,0613			EPAR pàgina 117: 98,9% vs 99,5%		EPAR pàgina 117: 57,8% grau 3-4 vs. 67,3%		IPT: 10,2% vs 7,4%		IPT: ajust o interrupció:52,2% vs 71%	EPAR PÀGINA 118: 12,5 VS 14,1		IPT: 11,7 mesos vs. 7,1 mesos per encora sol	Epar pàgina 115-116: 1495 pacients exposats a encorafenib. Exposats a la dosi de 450mg un cop al dia i juntament amb binimetinib són: 274 (192 de la primera part de l'estudi pivot, 75 de l'estudi CLGX818X2109, i 7 pacients de l'estudi CMEK162X2110.			EPAR. PÀGINA 95: The median time to definitive 10% deterioration in the QLQ-C30 global health status scores was longer in the Combo 450 arm compared with the Enco 300 arm (14.7 months [95% CI 9.2, 18.4]), with a HR for the difference of 0.45 (95% CI 0.31, 0.65)		Encorafenib 450mg/dia + Binimetinib 45mg/12h
EPAR	GP/RV	37	Binimetinib	Braftovi	Melanoma	centralized authorization		SLP vemura/cobimetinib: 12,3 SLP: dabrafenib/trametinib	10-20%	0.17	22-26	66.72		42/100.000	8/100.000		with	Directed agents		14.9	5.3	0.63	0.125	0.08	0.03	0.55	0.1		33.6	10.1		0.989	0.006	0.578	0.095	0.102	0.028	Yes	0.125	0.016	11,7 (median)					Yes	Twice	No	Up to progression
Database	GP/RV	37	Binimetinib	Braftovi	Melanoma	centralized authorization	0	SLP vemura/cobimetinib: 12,3 SLP: dabrafenib/trametinib	10-20%	0.17	22-26	66.72	0	42/100.000	8/100.000	0	with	Directed agents	0	14.9	5.3	0.63	0.125	0.08	0.03	0.55	0.1	0	33.6	10.1	0	0.989	0.006	0.578	0.095	0.102	0.028	Yes	0.125	0.016	11,7 (median)	0	0	0	0	Yes	Twice	No	Up to progression
Unit	Of Time							months			months									month									months												months						Day
Source / comments	Source / Comments	EMEA/H/C/004580/0000			Melanoma				Epar pàgina 9: 10-20% són metastàtics	EPAR, pàgina 9-10: supervivència a 10 anys, del 75-85%. Supervivència a 5 anys, 17%. Si no es tracta:6-9 mesos	EPAR, pàgina 10-11: amb els inhibidors de BRAF i Mek, SG de 22-26 mesos en melanoma metastàtic, BRAF mutat.	EPAR pàgina 95: basal: EORTC QLQ-C30		IARC: Prevalença a 5 anys, en 2020, 42/100.000	EPAR, pàg9: 123,135 nous casos al 2012, a Europa. A les zones mediterrànies, la icnidència varia entre el 3-5/100.000 casos a l'any. IPT: Incidència a Espanya: 8/100.000, dels quals un 2% en estadis avançats. Iarc: incidència ajustada per edat melanoma 2020: 6,8/100.000. La incidència crua és de 12,3/100.000			IPT: inhibidor BRAF y un inhibidor MEK o la inmunoterapia con anti-PD1 (nivolumab o pembrolizumab). EPAR PÀGINA 10-11: Vemurafenib/cobimetinib, dabrafenib/trametinib		IPT: encora/binimetinib 14,9 nesis vs. 9,6 mesos HR: 0,75 (0,56 ; 1,00), p=0,051		IPT: RECIST, per revisió central: 63% vs. 50,5 per encorafenib en monoteràpia		8% vs 5%		55% vs. 45%			EPAR pàgina 91: 33,6 vs 23,5 HR 0,81 (0,61 ; 1,06), p = 0,0613			EPAR pàgina 117: 98,9% vs 99,5%		EPAR pàgina 117: 57,8% grau 3-4 vs. 67,3%		IPT: 10,2% vs 7,4%		IPT: ajust o interrupció:52,2% vs 71%	EPAR PÀGINA 118: 12,5 VS 14,1		IPT: 11,7 mesos vs. 7,1 mesos per encora sol	Epar pàgina 121: 864 pacients exposats a binimetinib (427 en monoteràpia i 437 combiant amb encorafenib). Fins a 2016: 2555 pacients han rebut almenys una dosi de binimetinib. 450 pacients va ser exposats a la dosi de 450mg un cop al dia i juntament amb binimetinib són pel tractament de melanoma metastàtic.			EPAR. PÀGINA 95: The median time to definitive 10% deterioration in the QLQ-C30 global health status scores was longer in the Combo 450 arm compared with the Enco 300 arm (14.7 months [95% CI 9.2, 18.4]), with a HR for the difference of 0.45 (95% CI 0.31, 0.65)		Encorafenib 450mg/dia + Binimetinib 45mg/12h
EPAR	GP/RV	4	Padeliporfin	Tookad	Prostate cancer	centralized authorization		4.5	0.1	0.846	>24	82		596.2	150,6 /100 000		with	Others		0.283	0.142	Not evaluated	Not evaluated	Not evaluated	Not evaluated	Not evaluated	Not evaluated	Not Mentioned	Not evaluated	Not evaluated		94.9%	0.398	0.218	0.121	0.005	0.005	No	1.0%	0.5%	_	518			0.7	Yes	Other	No	Fixed
Database	GP/RV	4	Padeliporfin	Tookad	Prostate cancer	centralized authorization	0	4.5	0.1	0.846	>24	82	0	596.2	150,6 /100 000	0	with	Others	0	28.3	0.142	Not evaluated	Not evaluated	Not evaluated	Not evaluated	Not evaluated	Not evaluated	Not Mentioned	Not evaluated	Not evaluated	0	94.9%	0.398	0.218	0.121	0.005	0.005	No	1.0%	0.5%	_	518	0	0	0.7	Yes	Other	No	Fixed
Unit	Of Time							years			month				Dades de incidència crua en espanya																																Other
Source / comments	Source / Comments	EMEA/H/C/004182/0000			C. de Pròstata			IPT el temps mig fins a necessitar un tractament radical (progressió) en CP localitzat és de 4,5 anys	EPAR pàgina 8: 10% dels casos diagnòsticats són localment avançats o metatàtics IPT: al moment del diagnòstic, a Eruopa, el 15-20% estan en estadi avançat.	IPT: supervivencia relativa a los 5 años (84,6%)	IPT: Supervivència als 10 anys en pacients amb CProstata localitzat d'entre el 96-100%	EPAR pàgina 72: número d'onservacions basals per padeliporfina: 82.5 vs. 81.8 per la vigilància activa.		iarc: prevalença a 5 anys, homes, 2020: 596,2/100.000	Incidència ajustada per edad, 2020: 70,6/100.000 *EPAR pàgina 8: al 2012 420,000 nous casos de càncer de pròstata a Europa. *IPT: 30,000 casos de càncer de pròstat nous, al 2017. iarc: espanya, i			IPT: opcions terapèutiques del CP de baix risc: vigilància activa, tractament radical (prostatectomia radical, radioteràpia externa, braquiteràpia) i el tractament focal (ablació crioquirúrugica, ultrasons focalitzats d'alta intensitat o teràpies fotodinàmiques)		IPT: S'evalua el temps fins a progressió: 28,3 mesos pel grup actiu vs. 14,1 mesos.	Pàgina 82-83 EPAR: HR de temps fins a progressió ipsilateral: 0,17 respecte 0,34 per la vigilància activa HR 0,34; IC 95%: 0,24 - 0,46, p< 0,001 considera la població que compleix la indicació (post-hoc): temps fins a la progressió ipsilateral: HR0,11. Temps fins a la progressió global: 0,31	IPT: No es mesura la resposta segons RECIST. Es mesura el % de pacients lliures de càncer per biòpsia negativa al cap de 24 mesos: 49% vs.13,5%. L'ipt aporta dades de la població que compliria els criteris d'estudi, anàlisi post-hoc amb el 385 de la població: 45,0% vs. 10,3%						27.1% of patients in treatment group presented progression after 24 months. EPAR (65)				IPT pàgina 5: 94,95 vs. 55,1% (control)		IPT pàgina 5, grau 3-4: 21,8% vs. 9,7% (control)		Epar pàgina 102: 0,5% vs. 0 (IPT)		Dosi única.	Discontinuacoó del estudi. Dosi única.		No aplica perqué és intervenció unica.	EPAR pàgina 100: 948 pacients tractats amb padeliporfina, 430 amb indicació de càncer de pròstata. 391 amb la dosi de la indicació			EPAR pàgina 72: Canvi respecte la basal pel grup padeliporfina: -2,3 (-4,2 ; -0,4); respecte la vigilància activa: -3,0 (-5,0 ; -1,0). La diferència respecte la basal, entre grups és de 0,7 (-2,1 ; 3,4).	Administració a l'hospital amb les 6h posteriors estant en penombra a l'hospital, precaució amb l'exposció a la llum durant les 48 posteriors	Dosi única de 3,66mg/kg		Dosi única
Criteria	Evaluator	Identification EPAR #	Product (active)	Product (Brand)	Indication (tumour)		Disease severity	Speed tumor growth	% Metastasized	Expected survival 5-years	Overall Survival	Physical function and general health (SF36 - EQ5D - eortc qlq-c30)	Size of affected population - priorise ESP data, if no EU, if no Other	Prevalence	Incidence	Unmet needs	Treatment options	Type of standard of care	Comparative effectiveness	Progression Free Survival	Progression Free Survival	Objective Response Rate (RECIST/MRD)	Objective Response Rate (RECIST/MRD)	Complete response (RECIST/MRD)	Complete response (RECIST/MRD)	Partial response (RECIST /MRD)	Partial response (RECIST /MRD)	Long responders	Overall Survival	Overall Survival	Comparative safety/tolerability	Any Advers Events	Any Advers Events	Non-Fatal Serious Advers Events (>3)	Non-Fatal Serious Advers Events (>3)	Fatal Advers Events (Grade 5 AEs)	Fatal Advers Events (Grade 5 AEs)	Dosage adjustment due to adverse effects	Treatment discontinuation (due to AEs)	Treatment discontinuation (due to AEs)	Median duration of treatment	Other Indications (patienties exposed)	Other Indications (number of indications)	Comparative patient-perceived health / PRO	HRQoL	Impact on Autonomy	Frequency of treatment (how often is administered)	Variable treatment guideline	Time of treatment
METRIC								% increase (in tumor volume during one month) - category according to OS data in trials	% patients	%	Months (median)	Score		n/100.000	n/100.000		With/Without alternative	Chemotherapy / Immunotherapy / Directed agents /Surgery / Radio/ Combined /Others / None		Months (median )	Months (difference)	% Patients (observed)	% Patients (difference)	% Patients (observed)	% Patients (diference)	% Patients (observed)	% Patients (difference)	Mentioned (%)	Months (median)	Months (difference)		% Patients (observed)	% Patients (difference)	% Patients (observed)	% Patients (difference)	% Patients (observed )	% Patients (difference)	Mentioned	% Patients (observed)	% Patients (difference)	Months	# patients	# Indications		Score	(Y/N)	time	(Y/N)	Fixed / Up to progression
Definition								Time of duplication for solid tumours; time of duplication for hematological tumours. Single source such as Harrison's textbook or other source - to be specified	With metastasis at diagnosis; Cancer burden reports if the tumour is available : https://gco.iarc.fr/survival/survmark/	Survival expectation of indication as in https://gco.iarc.fr/survival/survmark/	Overall Survival is: less than 6 months, 6 to 12 months, 12 to 24 months, more than 24months. Check for disease in Cancer burden reports WHO at: https://gco.iarc.fr/survival/survmark/	Collect baseline value and maximum value for 100% health.		Proportion of cases in a given population at a given time	Number of new cases per population at risk in a given time period		The alternative is therapeutic abstention	Collect name of agents used, if any // radiotherapy// surgery - Use clinical guidance: SEOM/icopraxis/catsalut, ESMO guidance, ASCO guidance.		The median survival time during which patients have not experienced disease progression	The median survival time during which patients have not experienced disease progression	The proportion of patients that experience complete response and partial response	The proportion of patients that experience complete response and partial response	The proportion of patients that experience complete response	The proportion of patients that experience complete response	Reduced tumor burden but residual disease detectable	Reduced tumor burden but residual disease detectable	Mentioned (%)	The median time from treatment randomisation to death	The median time from treatment randomisation to death		The proportion of patients experiencing an adverse event	The proportion of patients experiencing an adverse event	The proportion of patients experiencing a Grade > 3	The proportion of patients experiencing a Grade > 3	The proportion of patients experiencing a Grade 5 adverse event	The proportion of patients experiencing a Grade 5 adverse event	Mentioned	The proportion of patients discontinuing treatment due to adverse events	The proportion of patients discontinuing treatment due to adverse events	Median and mean treatment duration	Number of potential patients for indications . Use size of exposed population as reported in EPAR	Number of indications		Score; If absent, record absence	Disruption of daily activities due to delivering of treatment: delivered in hospital site, in-hospital admission, imparired activities of daily life..	Normal duration of use; dose adminsitration by unit of time. Frequency of treatment (i ex every 6 months or monthly). When multiple, worse guideline for the patient.	Identify if the treatment guideline changes	Identify if the treatment includes a fixed number of cycles
EPAR	MO/DG	7	Midostaurina	Rydapt	LMC			3	NA	0.19	25.6	NA		0,1-0,3/100.000	4,2/100.000		with	Combined		Supervivència lliure d'esdeveniment: 8,2	5.2	NA	NA	0.589	0.054	NA	NA	0.51	74.7	49.1		1	NA	0.888	NA	0.026	0.005	Yes	0.031	0.018	34	>1800	advanced solid tumours, chronic lymphocytic leukaemia, non-hodgkin's lymphoma, etc		NA	No	Once	Once	Other
Database	MO/DG	7	Midostaurina	Rydapt	LMC	0	0	3	NA	0.19	25.6	NA	0	0,1-0,3/100.000	4,2/100.000	0	with	Combined	0	Supervivència lliure d'esdeveniment: 8,2	5.2	NA	NA	0.589	0.054	NA	NA	0.51	74.7	49.1	0	1	NA	0.888	NA	0.026	0.005	Yes	0.031	0.018	34	>1800	advanced solid tumours, chronic lymphocytic leukaemia, non-hodgkin's lymphoma, etc	0	NA	No	Once	Once	Other
Unit	Of Time							months			months									months	months								months	months											days						Day	Day
Source / comments	Source / Comments	molt poca info, hem mirat bastant el nostre IT						Control group PFS		Aged dependent: 50% < 60 years old; 3-8% > 60 years old. EPAR.	Informe tècnic			EPAR	IPT		EPAR	chemotherapy (idarubicina, citarabina, etopòsid, mitoxantrona) and allogeneic haematopoietic stem cell transplantation (ASCT)		Supervivència lliure d'esdeveniment. 95%CI: 5,4-10,7. HR: 0,78 [95%CI: 0,66-0,93] Aquest estudi te disease free survival or event free survival, no te PFS	Aged dependent: 50% < 60 years old; 3-8% > 60 years old. EPAR.				Control group: 53,5%			Percentatge de superivents +4anys	HR: 0,77 [95%CI: 0,63-0,95]								Control group: 2,1%	<2%	Informe tècnic	Control group: 1,3%	EPAR IPT: 42 (2-576)						del dia 8 al dia 21 de cada cicle de QT.	en monoteràpia de manteniment fins a recaiguda en aquells pacients amb RC (fins a un màxim de 12 cicles)	màxim 12 cicles en manteniment
EPAR	MO/DG	14	Inotuzumab ozagamicin	Besponsa	LLA			1.8	NA	0.085	<6	0.76		1-5/10.000	1,3/100.000		with	Combined		5	3.2	NA	NA	0.807	0.513	NA	NA	NA	7.7	1		0.944	-0.056	0.512	0.015	0.159	0.047	Yes	0.189	0.105	8.9	1207	NA		0.8	Yes	Other	Other	Other
Database	MO/DG	14	Inotuzumab ozagamicin	Besponsa	LLA	0	0	1.8	NA	0.085	<6	0.76	0	1-5/10.000	1,3/100.000	0	with	Combined	0	5	3.2	NA	NA	0.807	0.513	NA	NA	NA	7.7	1	0	0.944	-0.056	0.512	0.015	0.159	0.047	Yes	0.189	0.105	8.9	1207	NA	0	0.8	Yes	Other	Other	Other
Unit	Of Time							Months			Months	EQ-5D																													weeks				EQ-5D
Source / comments	Source / Comments							Median PFS SoC)		En adults amb primera recidiva 7-10%, faig promig		SoC		Orphanet	EPAR. Incidència crua			fludarabine/cytarabine/GCSF 4 cycles (4 set. Per cicle)// MXN/ara-c/metotrexat/cytarabine (4 cycles (14-20 days/cycle)// HIDAC-high dose cytarabine every 12 h up to 4 cycles (a second cycle was allowed)		HR: 0,452 [95%CI: 0,349-0,586]; p<0,0001	Control arm 1,8				Control arm: 29,4				HR: 0,77 [95%CI: 0,57-0,993; p<0,0105				Control group 100%	Dades IPT: eventos adversos graves comunicados	Control group 49,7		control group 11,2%			Control arm 8,4%							Day 0, day 8 and day 15 /3-4 weeks (Between 2 or 6 cycles depending on the possibility of transplantation (First cycle 3 o 4 weeks, following cycles 4 weeks)).	Depends on the objective (trasplantation vs non-trasplantation)	fixed but flexible depending on the response (between 2 or 3 cycles trasplantation or maximum of 6 cycles non trasplantation)
EPAR	MO/DG	32	Mogamulizumab	Poteligeo	SS			3.1	NA	0.745	>24	NA		unknown	0.4-1/100,000		with	Combined		7.7	4.6	0.28	0.232	NA	NA	NA	NA	NA	not achieved	not achieved		0.973	-0.022	0.255	-0.094	0.016	-0.032	No	0.215	0.079	5.6	542	peripheral T-cell lymphomas		absence	Yes	Once	Once	Other
Database	MO/DG	32	Mogamulizumab	Poteligeo	SS	0	0	3.1	NA	0.745	>24	NA	0	unknown	0.4-1/100,000	0	with	Combined	0	7.7	4.6	0.28	0.232	NA	NA	NA	NA	NA	not achieved	not achieved	0	0.973	-0.022	0.255	-0.094	0.016	-0.032	No	0.215	0.079	5.6	542	peripheral T-cell lymphomas	0	absence	Yes	Once	Once	Other
Unit	Of Time							months												months	months																				months						Week	2 Weeks
Source / comments	Source / Comments							SLP control group		Micosis fungoide: 74,5% En estadis inicials la supervivència es similar que en població general				orphanet, IPT, EPAR	IPT			terapia fotodinàmica, radio, quimio. En malaltia avançada es pot tractar amb: quimio sitèmca, fotoferesis sola o amb interfero, o metotrexate, bexaroteno o retinoides i/o radi. Agents autoritzats a UE: bexaroteno, bleomicina, dexametasona, interfero alfa, brentuximab vedotn. Vorinostat grup control al phase III	A	(IC95%: 5,67 a 10,33) Effect estimate per comparison; HR:0,53 [95%CI: 0,41-0,69]; p<0,0001	SLP control group 3,1 month	CI95% 21,6 - 35	control: 4,8 (CI95%:2,2 - 9)						Effect estimate per comparison: HR: 0,93 [95%CI: 0,61-1,43] p=0,9439	43,93 months (43,57, -)			Control group 99,5		Control group: 34,9%		Control group: 4,8			Control group: 13,6%	<1 a 45.3 months	at least one dose (EPAR)	under study (EPAR)			60 minutes infusion	Setmanal el primer cicle i cada dues setmanes el cicles següents fins a progressió o toxicitat		up to progression
EPAR	MO/DG	44	Daunorubicina / Citarabina	Vyxeos	LMA			1.31	NA	0.21	<6	NA		13,6/100.00	3,5/100.000		with	Chemotherapy		2.53	1.22	0.477	0.144	37.3	11.7	10.5	2.8	Not mentioned	9.56	3.61		1	0	0.923	0.025	0.091	-0.032	Not Relevant	0.019	0.003	62	403	unknown			Yes	>2	Twice	Other
Database	MO/DG	44	Daunorubicina / Citarabina	Vyxeos	LMA	0	0	1.31	NA	0.21	<6	NA	0	13,6/100.00	3,5/100.000	0	with	Chemotherapy	0	2.53	1.22	0.477	0.144	37.3	11.7	10.5	2.8	Not mentioned	9.56	3.61	0	1	0	0.923	0.025	0.091	-0.032	Not Relevant	0.019	0.003	62	403	unknown	0	0	Yes	>2	Twice	Other
Unit	Of Time							months			months																		month	month											days						Week	Week	Other
Source / comments	Source / Comments							dades del grup control		Depen de l'edat, si s'estandarditza per edat surt del 19% (IPT)	dades del grup control							citostaticos convencionales citarabina i daunorubicina pauta 7+3		Supervivencia libre de eventos (2,07-5) HR: 0,74, 1-sided, p=0,011	Control group: 1,31 (1,08-1,6)		Control group 33,3		Control group 25,6	Respuesta completa con recuperación hematológica incompleta	Control group 7,7		HR: 0,69 [95%CI: 0,52-0,9] p=0,03	Control group: 5,95					control group: 89,8		control group: 12,3	Don't know!!!		Control group 1,6		403 received at least one dose				90 minuts infusió intravenosa	dia 1,3 i 5 fase inducció/ 1 i 3 segona inducció, 1 i 3 consolidació.	Segona inducció i consolidació	fixed (maxim 4 cicles, dos inducció i dos consolidació) or time to progression
EPAR	MO/DG	54	Gemtuzumab ozogamicin	Mylotarg	LMA			16	NA	0.264	12 to 24	NA		NA	4,3/100.000		with	Chemotherapy		28	16.6	0.815	0.08	0.704	0.005	0.111	0.074	NA	27.5	5.7		0.985	0.043	0.87	0.045	0.061	0.01		0.313	0.24	12.14	2747	NA			Yes	>2	Once	Other
Database	MO/DG	54	Gemtuzumab ozogamicin	Mylotarg	LMA	0	0	16	NA	0.264	12 to 24	NA	0	NA	4,3/100.000	0	with	Chemotherapy	0	28	16.6	0.815	0.08	0.704	0.005	0.111	0.074	NA	27.5	5.7	0	0.985	0.043	0.87	0.045	0.061	0.01	0	0.313	0.24	12.14	2747	NA	0	0	Yes	>2	Once	Other
Unit	Of Time							months			months																		months												weeks						week	week
Source / comments	Source / Comments							SLP control		45,6%/7,1% pacients < 65 anys/pacients >65 anys, faig promig	21,8 month grup control				IPT, varia en funció de l'edat			daunorubicina + citarabina (3+7). Inducció i consolidació.		HR: 0,526 [95%CI: 0,362-0,764] p=0,0006	Control group: 11,4		Control group: 73,5		Control group: 69,9		Control group: 3,7		HR: 0,807 [95%CI: 0,596-1,093] p=0,1646	control group: 21,8			Control group:94,2		Control group: 82,5		Control group: 5,1			Control group:7,3							només una setmana durant la inducció primer cicle	Només un dia durant la consolidació (dia 1 de cada cicle de consolidació, màxim dos cicles)	fixed
EPAR	MO/DG	59	Polatuzumab vedotin	Polivy	Limfoma			3.7	NA		6	NA		NA	3,8/100.000		with	Combined		9.5	5.8	0.45	0.275	0.4	0.225	0.05	0.05	NA	12.4	7.7		1	0.026	0.844	0.126	0.2	-0.082	Yes	0.333	0.102	6.2	588	unknown		NA	Yes	Once	Other	Other
Database	MO/DG	59	Polatuzumab vedotin	Polivy	Limfoma	0	0	3.7	NA	0	6	NA	0	NA	3,8/100.000	0	with	Combined	0	9.5	5.8	0.45	0.275	0.4	0.225	0.05	0.05	NA	12.4	7.7	0	1	0.026	0.844	0.126	0.2	-0.082	Yes	0.333	0.102	6.2	588	unknown	0	NA	Yes	Once	Other	Other
Unit	Of Time							months			months																		months	months											months						Month
Source / comments	Source / Comments							depenent de la teràpia utilitzada pot variar.		no disponible	IPT				EPAR			Diferens tractaments en pacients R/R: R-GEMOX (rituxi + gemcitabina+ oxiloplati) o BR (bendamustina + rituxi) o CAR-T o pixantrona, etc.		HR: 0,36 [95%CI: 0,21-0,63] p=0,0002	control group: 3,7		Control group: 17,5		control group: 17,5				(9-NE) HR: 0,37 [95%CI: 0,16-0,85]	Control group: 4,7			97.4		Control group: 71,8		Control group: 28,2										cada 21 dies durant sis cicles	sempre la mateixa pauta	6 cicles fixe
EPAR	MO/DG	63	Gilteritinib	Xospata	LMA			0.7	NA	0.1	<6	NA		NA	4,2/100.000		with	Chemotherapy		2.8	2.1	0.676	0.418	0.211	0.092	0.134	0.094	NA	9.3	3.7		1	0.018	0.959	0.097	0.289	0.142	Yes	0.236	0.117	114	764	Unknown		NA	No	Once	Other	Other
Database	MO/DG	63	Gilteritinib	Xospata	LMA	0	0	0.7	NA	0.1	<6	NA	0	NA	4,2/100.000	0	with	Chemotherapy	0	2.8	2.1	0.676	0.418	0.211	0.092	0.134	0.094	NA	9.3	3.7	0	1	0.018	0.959	0.097	0.289	0.142	Yes	0.236	0.117	114	764	Unknown	0	NA	No	Once	Other	Other
Unit	Of Time							months												months	months								months	months											days						Day
Source / comments	Source / Comments							dades del progressió lliure d'esdeveniments del braç control		Supervivència a cinc anys després de recaiguda. En altres tractaments per LMA hem posat la SG en funció de l'edat. Segones recaigudes la supervivència és de setmanes.	5,3 mesos grup control amb QT							Baixa intensitat (cicles de 28 dies): Esquema LoDAC: citarabina sc o iv 20 mg dos cops al dia durant 10 dies.Azacitidina sc o iv durant 7 dies. Alta intensitat (cicles de 28 dies): MEC (mitoxantrona, etoposido i citarabina durant 5 dies), FLAG-IDA (fludarabina, citarabina i idarubicina i G-CSF)		Event free survival (relapse, treatment failure, death, censored events) 1,4-3,7 HR: 0,793 [95%CI: 0,577-1.089]	Control group: 0,7 (0,2-NE)	Overall response rate contempla diferents CR (CR, CRi, CRp, PR)	control group: 25,8	16,2-26,8	control group: 11,9% (6,5-19,5)		Control group: 4%		7,7-10,7 HR: 0,637 [95%CI: 0,49-0.83] p=0,0004	Control group: 5,6 (4,7-7,3)			Control group: 98,2		Control group: 86,2		Control group: 14,7	increase and decrease	interruptions. Un 10% discontinuation pero son dades integrades de varis assaigs.	Control group: 11,9%			S'està fent recerca en NSCLC, solid tumours or AML					NO	up to progression
Criteria	Evaluator	Identification EPAR #	Product (active)	Product (Brand)	Indication (tumour)		Disease severity	Speed tumor growth	% Metastasized	Expected survival 5-years	Overall Survival	Physical function and general health (SF36 - EQ5D - eortc qlq-c30)	Size of affected population - priorise ESP data, if no EU, if no Other	Prevalence	Incidence	Unmet needs	Treatment options	Type of standard of care	Comparative effectiveness	Progression Free Survival	Progression Free Survival	Objective Response Rate (RECIST/MRD)	Objective Response Rate (RECIST/MRD)	Complete response (RECIST/MRD)	Complete response (RECIST/MRD)	Partial response (RECIST /MRD)	Partial response (RECIST /MRD)	Long responders	Overall Survival	Overall Survival	Comparative safety/tolerability	Any Advers Events	Any Advers Events	Non-Fatal Serious Advers Events (>3)	Non-Fatal Serious Advers Events (>3)	Fatal Advers Events (Grade 5 AEs)	Fatal Advers Events (Grade 5 AEs)	Dosage adjustment due to adverse effects	Treatment discontinuation (due to AEs)	Treatment discontinuation (due to AEs)	Median duration of treatment	Other Indications (patienties exposed)	Other Indications (number of indications)	Comparative patient-perceived health / PRO	HRQoL	Impact on Autonomy	Frequency of treatment (how often is administered)	Variable treatment guideline	Time of treatment
METRIC								% increase (in tumor volume during one month) - category according to OS data in trials	% patients	%	Months (median)	Score		n/100.000	n/100.000		With/Without alternative	Chemotherapy / Immunotherapy / Directed agents /Surgery / Radio/ Combined /Others / None		Months (median )	Months (difference)	% Patients (observed)	% Patients (difference)	% Patients (observed)	% Patients (diference)	% Patients (observed)	% Patients (difference)	Mentioned (%)	Months (median)	Months (difference)		% Patients (observed)	% Patients (difference)	% Patients (observed)	% Patients (difference)	% Patients (observed )	% Patients (difference)	Mentioned	% Patients (observed)	% Patients (difference)	Months	# patients	# Indications		Score	(Y/N)	time	(Y/N)	Fixed / Up to progression
Definition								Time of duplication for solid tumours; time of duplication for hematological tumours. Single source such as Harrison's textbook or other source - to be specified	With metastasis at diagnosis; Cancer burden reports if the tumour is available : https://gco.iarc.fr/survival/survmark/	Survival expectation of indication as in https://gco.iarc.fr/survival/survmark/	Overall Survival is: less than 6 months, 6 to 12 months, 12 to 24 months, more than 24months. Check for disease in Cancer burden reports WHO at: https://gco.iarc.fr/survival/survmark/	Collect baseline value and maximum value for 100% health.		Proportion of cases in a given population at a given time	Number of new cases per population at risk in a given time period		The alternative is therapeutic abstention	Collect name of agents used, if any // radiotherapy// surgery - Use clinical guidance: SEOM/icopraxis/catsalut, ESMO guidance, ASCO guidance.		The median survival time during which patients have not experienced disease progression	The median survival time during which patients have not experienced disease progression	The proportion of patients that experience complete response and partial response	The proportion of patients that experience complete response and partial response	The proportion of patients that experience complete response	The proportion of patients that experience complete response	Reduced tumor burden but residual disease detectable	Reduced tumor burden but residual disease detectable	Mentioned (%)	The median time from treatment randomisation to death	The median time from treatment randomisation to death		The proportion of patients experiencing an adverse event	The proportion of patients experiencing an adverse event	The proportion of patients experiencing a Grade > 3	The proportion of patients experiencing a Grade > 3	The proportion of patients experiencing a Grade 5 adverse event	The proportion of patients experiencing a Grade 5 adverse event	Mentioned	The proportion of patients discontinuing treatment due to adverse events	The proportion of patients discontinuing treatment due to adverse events	Median and mean treatment duration	Number of potential patients for indications . Use size of exposed population as reported in EPAR	Number of indications		Score; If absent, record absence	Disruption of daily activities due to delivering of treatment: delivered in hospital site, in-hospital admission, imparired activities of daily life..	Normal duration of use; dose adminsitration by unit of time. Frequency of treatment (i ex every 6 months or monthly). When multiple, worse guideline for the patient.	Identify if the treatment guideline changes	Identify if the treatment includes a fixed number of cycles
EPAR	CP/DE	10	Tivozanib	Fotivda	Advanced renal cell cancer	centralized authorization		460.01 days (range 174-913 days).	0.3	0.85	>24	FACT-G score 77/108		NA	14.8 cases per 100.000 inh		with	Directed agents		11.9 months	1.2 months	33.1%	NS	1.2%	0.4%	31.9%	9.8%	No	28.6 months	-2.6 months		78.4%	11.5%	TEAEs 64% - Related 28.6%	0.06	10.8%	0.05	Yes	14.7%	1.5%	15 months / 12 months	~max 2000? / 835	1		FACT-G 73/108, not significant between groups	No	Once	Yes	Up to progression
Database	CP/DE	10	Tivozanib	Fotivda	Advanced renal cell cancer	centralized authorization	0	460.01 days (range 174-913 days).	0.3	0.85	>24	FACT-G score 77/108	0	NA	14.8 cases per 100.000 inh	0	with	Directed agents	0	11.9 months	1.2 months	33.1%	NS	1.2%	0.4%	31.9%	9.8%	No	28.6 months	-2.6 months	0	78.4%	11.5%	TEAEs 64% - Related 28.6%	0.06	10.8%	0.05	Yes	14.7%	1.5%	15 months / 12 months	~max 2000? / 835	1	0	FACT-G 73/108, not significant between groups	No	Once	Yes	Up to progression
Unit	Of Time																with	Directed agents																												No	Day	Other	Other
Source / comments	Source / Comments	Centralized authorization	Tivozanib	Fotivda	Fotivda is indicated for the first line treatment of adult patients with advanced renal cell carcinoma (RCC) and for adult patients who are VEGFR and mTOR pathway inhibitor-naïve following disease progression after one prior treatment with cytokine therapy for advanced RCC. Source ->IPT, EPAR, NICE, ESMO-MCBS, SEOM, ESMO, ASCO,			http://dx.doi.org/10.4103/0970-1591.126894	IPT – also, 30% will metastatize along disease course	IPT: 85% if localized, 10% if metastatic	IPT: Mean with SOC (sorafenib) in trials 30.8 months	Total FACT-G Score (possible values from 0 to 108) was Mean (std) 77.05 (14.967) for tivozanib and 76.93 (15.949) for sorafenib at baseline.		NA	6878 cases/year in Spain 2017 (46.53 milion inh) BUT: https://ecis.jrc.ec.europa.eu/ indicates 8554 cases in 2020, of which 2999 deaths (?)		Sorafenib	Sorafenib (kinase inhibitor with antiangiogenic properties). Also immunotherapy, chemotherapy / Combined? DE: nefrectomía citorreductiva, resección de metástasis y/o terapia sistémica. IPT: Sunitinib, pazopanib y bevacizumab en combinación con IFN-α han desplazado a las citoquinas y al IFN-α como estándar de tratamiento en pacientes con CCRm que no han recibido tratamiento previo.		IPT 11.9 tivozanib vs 9.1 sorafenib // 12.7 vs 9.1 if no previous treatment (1st line) /// DE --> EPAR: 14.7 --> Efficacy results (pag.88) based on pivotal & extension (AV-951-09-301/902) / BUT IPT: el grupo tivozanib respecto a sorafenib de 3,6 meses (12,7 tivozanib vs. 9,1 meses sorafenib; p=0,037)	IPT HR 0.797 (0.639 to 0.993) /// DE: if EPAR reference diference is 5	IPT 33.1% vs 23.3% Not significant /// DE --> EPAR: page 88 --> For patients who remained on initial randomised tivozanib or sorafenib, the ORR was 55.7% (95% CI: 44.7%, 66.3%) and 57.1% (95% CI: 37.2%, 75.5%) respectively.	IPT 9.8% not significant / DE --> -1.4 EPAR pag 88	EPAR 1.2% vs 0.8%	EPAR NS	EPAR 31.9% vs 22.6%	EPAR Not tested (only ORR)	EPAR Not mentioned	IPT 28.6 vs 30.8 in sorfenib	IPT Tizo group no crossover, sorafenib failures received tivozanib. HR 1.147 (0.896 to 1.470)		EPAR 78.4 vs 89.9%	EPAR (not tested for significance)	EPAR: TEAEs 64% vs 70% - Related 28.6% vs 21.8%		IPT 10.8% vs 5.8%	Mostly due to disease progression	dose reduction 37.4% vs 22.4% sorafenib Different concepts: dose reduction, dose interruption, treatment discontinuation	14.7% vs 13.2 %	Cerebrovascular events mentioned	Not described in IPT nor EPAR – inferred form time to progression 15 months vs 12.9 months in sorafenib / DE --> EPAR: Pag 93 - "duration of exposure"	IPT: one third of all with Advanced càncer at dx per year, if 6000 new cases, 2000 potential candidates. // DE --> EPAR: Pag 93 - "duration of exposure"	Only Advanced renal cancer		FACT-G at the end of treatment 215 patients in the tivozanib arm and 214 patients in the sorafenib arm completed the questionnaire and the scores were Mean (std) 73.53 (17.781) and 73.04 (18.110) respectively, changes from baseline were -3.66 (14.995) for tivozanib and -4.82 (14.684) for sorafenib. The results were not statistically significant.	Ambulatory oral treatment	Once daily 21 days, 7 days rest, continued while on response	May be modified per safety	Up to disease progression
EPAR	CP/DE	17	Dinutuximab beta	Qarziba	Neuroblastoma	Authorization under exceptional circumstances			91-100%	0.5	>24	NA		NA	31		with	Chemotherapy		19.5	15	0.36	NA	0.13	NA	0.23	NA	No	24,6 months	12.3 months		1	NA	48,6% to 100%	NA	2-3%	NA	Not Relevant	9,3% to 22,7%	NA	4,46 cycles	514	0		NA	Yes	Other	Yes	Fixed
Database	CP/DE	17	Dinutuximab beta	Qarziba	Neuroblastoma	Authorization under exceptional circumstances	0	0	91-100%	0.5	>24	NA	0	NA	31	0	with	Chemotherapy	0	19.5	15	0.36	NA	0.13	NA	0.23	NA	No	24,6 months	12.3 months	0	1	NA	48,6% to 100%	NA	2-3%	NA	Not Relevant	9,3% to 22,7%	NA	4,46 cycles	514	0	0	NA	Yes	Other	Yes	Fixed
Unit	Of Time																			Months	months								Months	Months																	Other	Other	Other
Source / comments	Source / Comments	Authorization under exceptional circumstances	Dinutuximab beta	Qarziba	Qarziba is indicated for the treatment of high-risk neuroblastoma in patients aged 12 months and above, who have previously received induction chemotherapy and achieved at least a partial response, followed by myeloablative therapy and stem cell transplantation, as well as patients with history of relapsed or refractory neuroblastoma, with or without residual disease. In relapsed/refractory disea…			Not found		High risk	7.3 years in external control cohort	Not reported	700-800 cases in US. Is the most freqüent càncer in young children	NA	Spain:70 cases per year (6,88 inhabitants aged -14y * 10.2 cases per million children under 15 years of age) of which 45% high risk-> 31 cases // accounts for approximately 7% of paediatric malignancies		Several standards of care	Chemotherapy, other immunotherapy		Median 584 days vs 135 days – page 84 EPAR	EFS 135 in control		No control		No control		No control		Median not achieved vs 383.3 // mean 749 days (24,6 months) vs 368 days (12,3 months) page 84 EPAR				No control		No control		No control	Many details on individual cases	minimum and maximum across pivotal and supportive trials	No control	Derived from table 38 in page 92 EPAR	Overall exposure in the development, no other patients available	Only neuroblastoma		Not reported	Heavy impact, intravenous several days per cycle, poor tolerability, pain	5 cycles of 35 days with dose by body Surface – posology can be 5 infusions of 8 hours in consecutive days or 10 days continuous infusion. Requires previous dosing of retinoid acid and IL-2	Many details on individual cases	5 cycles, but studies report longer administrations
EPAR	CP/DE	31	Brigatinib	Alunbrig	Lung cancer - NMSCLC	Centralized authorization		221.6 days for adenocarcinoma, 115.2 days for squamous cell carcinoma	60% Advanced disease / 69.4%	0.15	12 to 24	55.4/100			58.6		with	Directed agents		9,2% //15,6%		45,5%//56,4%		1,8%//4,5%		43,8% // 51,8%		Yes	29,5//34,1			1		63,3% // 70,9%		19,3% // 10,0% Related: 11%//6,4%		Yes	7.3% / 10,9%		22,9 months	274 / 219	1		absent / 58.49	No	Once	Yes	Up to progression
Database	CP/DE	31	Brigatinib	Alunbrig	Lung cancer - NMSCLC	Centralized authorization	0	221.6 days for adenocarcinoma, 115.2 days for squamous cell carcinoma	60% Advanced disease / 69.4%	0.15	12 to 24	55.4/100	0	0	58.6	0	with	Directed agents	0	9,2% //15,6%	0	45,5%//56,4%	0	1,8%//4,5%	0	43,8% // 51,8%	0	Yes	29,5//34,1	0	0	1	0	63,3% // 70,9%	0	19,3% // 10,0% Related: 11%//6,4%	0	Yes	7.3% / 10,9%	0	22,9 months	274 / 219	1	0	absent / 58.49	No	Once	Yes	Up to progression
Unit	Of Time																			months									Months									Yes								No	Day	Other	Other
Source / comments	Source / Comments	Centralized authorization	Brigatinib	Alunbrig	Alunbrig is indicated as monotherapy for the treatment of adult patients with anaplastic lymphoma kinase ALKpositive advanced NSCLC previously treated with crizotinib.			Jpn J Clin Oncol . 1994 Aug;24(4):199-204.	25% es diagnostiquen en estadiatge III (localment avançat no resecable, no metastàtic), 30-40% poden fer Q-R. /// DE --> IPT: avanzado o metastasico. "El 69,4% (154/222) de los pacientes presentaban metástasis cerebrales y de estos, en el 70,8% (109/154) eran metástasis cerebrales activas"/ Ensayo clínico fase II (AP26113-13-201)	9% to 13% according to IPT	Median life expectancy reported in ASCEND-2 was 14.9 months and in ASCEND-5 it was 18.1 months. Mean overall survival was not reported in ASCEND-2 and ASCEND-5. The company's model predicted a mean overall survival of 22 months for people with ALK-positive advanced NSCLC.	QLQ-C30 (EPAR)	5% of all NSCLC are ALK +; 2/3 have brain metastasis		Lung cancer incidence/100.000 inh/year (numbers extracted from IPT: 27351 cases in 2018; inhabitants from INE: 46,658,447 by january 2018)		Alectinib, ceritinib, chemotherapy	Directed agents /// DE --> Combined? IPT: "co-administración de un platino con agentes tales como taxanos, gemcitabina, vinorelbina, pemetrexed, etopósido y vinblastina"		Arm A, Arm B / HR 0,64 (0,45-0,91)	No control	Arm A, Arm B	No control	Arm A, Arm B	No control	Arm A, Arm B	No control	EPAR: Conclusions on the clinical efficacy. The efficacy for the treatment of adult patients with anaplastic lymphoma kinase (ALK)-positive advanced non-small cell lung cancer (NSCLC) previously treated with crizotinib is demonstrated on the basis of high ORR and long duration of response. Pag 99	Arm A, Arm B / HR 0,67 (0,42-1,06)	No control		DE: 95,5% EPAR: Table 67: Overview of TEAEs (Treated Population – Study 201) 90/180 / Drug related	No control	In each cohort /// DE --> 35.5% EPAR: Table 67: Overview of TEAEs (Treated Population – Study 201) 90/180 / Drug related	No control	Most cases due to disease progression, less frequently in the high doe sarm (B) /// DE --> 10% EPAR: Table 67: Overview of TEAEs (Treated Population – Study 201) 90/180 / Drug related	No control	Page 12 of epar	DE --> EPAR: Table 67: Overview of TEAEs (Treated Population – Study 201) 90/180 / Drug related	No control	IPT	DE --> EPAR: Table 65: Study 201 Drug Exposure (Treated Population). Data extraction date (29/09/2017)	Post crizotinib (current) and first line (presented later)		Data available for baseline, seems that no differences were observed at end-of-study. Graph with no numbers. /// DE --> EPAR: Figure 20: Adjusted Mean Scores for Transformed Global Health Status/QOL Scale over Time (ITT Population) - C30 / Arm 90-180		First week with half dose, then 180 mg	If adverse effects, by -60, -30, -30 consecutively. If not enough, discontinue.
EPAR	CP/DE	36	Durvalumab	Imfinzi	Lung cancer - NMSCLC	Centralized authorization		221.6 days for adenocarcinoma, 115.2 days for squamous cell carcinoma	60% Advanced disease	0.15	12 to 24	NA / 54.9			58.6		without	None		2021-02-17	2021-06-11	28.4%	12.4%	1.4%	0.9%	27.1%	11.6%	No	NA	28.7 / ?		96.8%	1.9%	12% / 8.4%	7.3% / 5%	2021-04-04	-1.6%%	No	9.9%	6.5%	16.5 infusions / 28.3 months	1.7 / 709	no		No significant differences	Yes	Twice	No	Fixed
Database	CP/DE	36	Durvalumab	Imfinzi	Lung cancer - NMSCLC	Centralized authorization	0	221.6 days for adenocarcinoma, 115.2 days for squamous cell carcinoma	60% Advanced disease	0.15	12 to 24	NA / 54.9	0	0	58.6	0	without	None	0	2021-02-17	2021-06-11	28.4%	12.4%	1.4%	0.9%	27.1%	11.6%	No	NA	28.7 / ?	0	96.8%	1.9%	12% / 8.4%	7.3% / 5%	2021-04-04	-1.6%%	No	9.9%	6.5%	16.5 infusions / 28.3 months	1.7 / 709	no	0	No significant differences	Yes	Twice	No	Fixed
Unit	Of Time																													months																Yes	Month
Source / comments	Source / Comments	Centralized authorization	Durvalumab	Imfinzi	IMFINZI as monotherapy is indicated for the treatment of locally advanced, unresectable non-small cell lung cancer (NSCLC) in adults whose tumours express PD-L1 on ≥ 1% of tumour cells and whose disease has not progressed following platinum-based chemoradiation therapy. IMFINZI in combination with etoposide and either carboplatin or cisplatin is indicated for the first-line treatment of adults wi…			Jpn J Clin Oncol . 1994 Aug;24(4):199-204.	25% es diagnostiquen en estadiatge III (localment avançat no resecable, no metastàtic), 30-40% poden fer Q-R.	9% to 13% according to IPT	Median life expectancy reported in ASCEND-2 was 14.9 months and in ASCEND-5 it was 18.1 months. Mean overall survival was not reported in ASCEND-2 and ASCEND-5. The company's model predicted a mean overall survival of 22 months for people with ALK-positive advanced NSCLC.	Only information is WHO performance status at baseline, being 0 for 48,8% and 1 in 50,8%. EORTC-QLQ-C30 and C13 are informed only for change from baseline, but data on baseline values is not available. No significant changes are reported after treatment. /// DE --> EPAR: Figure 23 Forest plot of Time to deterioration of EORTC QLQ-C30 and QLQ-LC13 subscales and items			Lung cancer incidence/100.000 inh/year (numbers extracted from IPT: 27351 cases in 2018; inhabitants from INE: 46,658,447 by january 2018)		The alternative in the approved indication is active follow-up	vigilance only /// DE --> Combined? IPT:quimiorradiación concurrente con intención curativa. Cuando la quimiorradiación concurrente no es posible, la quimioterapia secuencial seguida de radioterapia definitiva		IPT: 17.2 (13.1 to 23.9) HR 0.51(0.41 to 0.63) EPAR: 16.8 vs 5.6, HR 0.52 90%CI: 0.39, 0.70	control 5.6 (4.6 to 7.7)	126/443	control 16% (34/213)		control 0.5%		control 15.5%	not mentioned in IPT nor EPAR	Median no achieved	OS at 24 months 66,3% vs 30.8% in control group /// 0,68 (0,53 - 0,87) Valor p- bilateral 0,00251			94.9%	DE --> IPT: Los EA graves relacionados con el tratamiento ocurrieron en el 8,4% y 3,4% de los pacientes, respectivamente.	4.7% /// DE --> IPT: Los EA graves relacionados con el tratamiento ocurrieron en el 8,4% y 3,4% de los pacientes, respectivamente.		0.06	Dose reduction is not recommended - dose witholding or discontinuation may be required. Delay in administration 42.5% vs 30.8% in control group		3.4%	IPT says 44 weeks, EPAR mean 16.5 infusions vs 14.8 in control group. Median 20 infusions vs 14 /// DE --> IPT: IPT: la mediana de tiempo hasta la muerte o metástasis a distancia	14.8 // DE --> EPAR	only indication to moment; FDA has approved urotelial cancer under accelerated procedure		Only change from baseline reported, no absolute values.	needs day-care administration every 2 weeks for a 60 minutes infusion, during 12 months.	every two weeks for 12 months	only withstanding or discontinuation, no dose reduction nor specific guidance to withstanding.	maximum 1 year
EPAR	CP/DE	65	Larotrectinib	Vitrakvi	Agnostic	Conditional approval			1						Globally, the calculated overall NTRK gene fusion incidence and 5-year prevalence were 0.52 and 1.52 per 100,000 persons, respectively.		without	None		27.4		0.67			0.15		0.51		16.7			0.8		0.19		0.06		No	0.02			167				No	Twice	Yes	Up to progression
Database	CP/DE	65	Larotrectinib	Vitrakvi	Agnostic	Conditional approval	0	0	1	0	0	0	0	0	Globally, the calculated overall NTRK gene fusion incidence and 5-year prevalence were 0.52 and 1.52 per 100,000 persons, respectively.	0	without	None	0	27.4	0	0.67	0	0	0.15	0	0.51	0	16.7	0	0	0.8	0	0.19	0	0.06	0	No	0.02	0	0	167	0	0	0	No	Twice	Yes	Up to progression
Unit	Of Time																																														Day
Source / comments	Source / Comments	Conditional approval	Larotrectinib	Vitrakvi	Agnostic: treatment of adult and paediatric patients with solid tumours that display a Neurotrophic Tyrosine Receptor Kinase (NTRK) gene fusion, who have a disease that is locally advanced, metastatic or where surgical resection is likely to result in severe morbidity, and who have no satisfactory treatment options. Source -> EPAR / NICE / SEOM-ESMO				EPAR: "Patients included in all studies were required to have a locally advanced or metastatic solid tumour"						https://www.ncbi.nlm.nih.gov/pmc/articles/PMC7758559/			clinically managed based on care standards for the tumour site of origin		The progression-free survival (PFS) median event-rate was low at 37% (IRC) and 38% (INV) in the ePAS2, and the median was 27.4 months (95% CI: 13.8, NE) by IRC and 28.3 months (95% CI: 15.2, NE) by investigator assessments. The PFS rate at 6 months was 77%, and the PFS rate at 12 months was 64% (95% CI: 51, 76%) by IRC.		EPAR: table 62 [Pooled efficacy results n= 102]			EPAR: table 62		EPAR: table 62		The overall survival (OS) median was not reached in the ePAS2 as a result of the present very low event-rate of 15% (14/93 dead). The OS median follow-up time was 16.7 months																median score for pool trials not included in EPAR			if adverse reaction (EPAR pag 18)
EPAR	CP/DE	75	Lorlatinib	Lorviqua	Lung cancer - NMSCLC	Conditional approval		221.6 days for adenocarcinoma, 115.2 days for squamous cell carcinoma	60% Advanced disease / 69%	0.13	12 to 24				58.6		with	Directed agents		2021-09-06	na	42.9%	na	3.6%	na	39.3%	na	Not mentioned	21.1 / 20	na		94.9%	na	41.0%	na	0	na	Yes	2.4%	na	16.33	no / 295	0			No	Once	Yes	Up to progression
Database	CP/DE	75	Lorlatinib	Lorviqua	Lung cancer - NMSCLC	Conditional approval	0	221.6 days for adenocarcinoma, 115.2 days for squamous cell carcinoma	60% Advanced disease / 69%	0.13	12 to 24	0	0	0	58.6	0	with	Directed agents	0	2021-09-06	na	42.9%	na	3.6%	na	39.3%	na	Not mentioned	21.1 / 20	na	0	94.9%	na	41.0%	na	0	na	Yes	2.4%	na	16.33	no / 295	0	0	0	No	Once	Yes	Up to progression
Unit	Of Time																												months												months						Day
Source / comments	Source / Comments	Conditional approval	Lorlatinib	Lorviqua	Lorviqua as monotherapy is indicated for the treatment of adult patients with anaplastic lymphoma kinase (ALK) positive advanced non small cell lung cancer (NSCLC) whose disease has progressed after alectinib or ceritinib as the first ALK tyrosine kinase inhibitor (TKI) therapy; or crizotinib and at least one other ALK TKI. Source -> IPT, EPAR, NiCE, ESMO			Jpn J Clin Oncol . 1994 Aug;24(4):199-204.	25% es diagnostiquen en estadiatge III (localment avançat no resecable, no metastàtic), 30-40% poden fer Q-R.	Discrepància 15% / 13,5%, poso 13%. 9% to 13% according to IPT / Estrategia Nacional 2021 (general pulmon) https://www.mscbs.gob.es/organizacion/sns/planCalidadSNS/pdf/Estrategia_en_cancer_del_Sistema_Nacional_de_Salud_Actualizacion_2021.pdf	Median life expectancy reported in ASCEND-2 was 14.9 months and in ASCEND-5 it was 18.1 months. Mean overall survival was not reported in ASCEND-2 and ASCEND-5. The company's model predicted a mean overall survival of 22 months for people with ALK-positive advanced NSCLC.				Lung cancer incidence/100.000 inh/year (numbers extracted from IPT: 27351 cases in 2018; inhabitants from INE: 46,658,447 by january 2018). Only 5% are ALK mutated.		Advanced ALK-positive NSCLC is usually first treated with an ALK tyrosine kinase inhibitor (alectinib or ceritinib, or crizotinib followed by either brigatinib or ceritinib). People then have either platinum doublet chemotherapy (PDC) or atezolizumab with bevacizumab, carboplatin and paclitaxel (ABCP). DE --> IPT: Actualmente lorlatinib es la única alternativa terapéutica autorizada de las difere…	crizotinib, ceritinib, alectinib, brigatinib, chemotherapy		separate results for 1 previous itk (6.9) or 2 or more (5.5)	no control	separate results for 1 previous itk (42.9%) or 2 or more (39.6%)	no control	separate results for 1 previous itk (3.6%) or 2 or more (1.8%)	no control	separate results for 1 previous itk (39.3%) or 2 or more (37.8%)	no control	not mentioned IPT nor EPAR	separate results for 1 previous itk (21.1 months) or 2 or more (19.2 months) / DE: EPAR: pag 89 (median phase II)	no control			no control		no control	no deaths attributed to related AEs	no control	21% required dose reduction. Dosing interruption or dose reduction may be required based on individual safety and tolerability.	2.4% required definitive discontinuation of treatment	no control	IPT	no other indications so far / DE--> EPAR: page 77 (patients exposure)			No absolute values, only change from baselin. The majority of patients had either improved (42.7%) or stable (39.6%) scores in global QoL during treatment (including all cycles).		oral treatment once daily	Lorlatinib dose reduction levels are summarised below: First dose reduction: 75 mg taken orally once daily; Second dose reduction: 50 mg taken orally once daily. Lorlatinib should be permanently discontinued if the patient is unable to tolerate the 50 mg dose taken orally once daily.	Until clinical progression or intolerance
EPAR	CP/DE	77	Dacomitinib	Vizimpro	Lung cancer - NMSCLC	under additional monitoring			1	0.135	12 to 24	-4.7		155	ESP CP (28.347); CPNM (80%-85%); metastasico (2/3); mutacion EGFR (10%)		with	Directed agents		14.7	5.5	0.749	0.033	0.696	0.002	0.132	0.012	not mentioned	34.1	7.3		0.969	0.018	0.097	0.03	0.009	0.009	Yes	0.013	-0.005	16.5	2122			-4.7	No	Once	No	Up to progression
Database	CP/DE	77	Dacomitinib	Vizimpro	Lung cancer - NMSCLC	under additional monitoring	0	0	1	0.135	12 to 24	-4.7	0	155	ESP CP (28.347); CPNM (80%-85%); metastasico (2/3); mutacion EGFR (10%)	0	with	Directed agents	0	14.7	5.5	0.749	0.033	0.696	0.002	0.132	0.012	not mentioned	34.1	7.3	0	0.969	0.018	0.097	0.03	0.009	0.009	Yes	0.013	-0.005	16.5	2122	0	0	-4.7	No	Once	No	Up to progression
Unit	Of Time																																														Day
Source / comments	Source / Comments	under additional monitoring	Dacomitinib	Vizimpro	Untreated EGFR mutation-positive non_x0002_small-cell lung cancer							EPAR (C30): In the dacomitinib arm, there was no statistically significant change from baseline observed for overall global QoL.		Estrategia Nacional 2021 (general pulmon) https://www.mscbs.gob.es/organizacion/sns/planCalidadSNS/pdf/Estrategia_en_cancer_del_Sistema_Nacional_de_Salud_Actualizacion_2021.pdf	IPT: Globocan 2018. International Agency for Research on Cancer. World Health Organization. http://globocan.iarc.fr. 4. Las cifras del cáncer en España 2018. Sociedad Española de Oncología Médica. Disponible en: https://seom.org/seomcms/images/stories/recursos/Las_Cifras_d el_cancer_en_Espana2018.pdf.			TKI (tyrosine kinase inhibitors) is a targeted tretament		HR: 0,589 (0,469-0,739)/ <0,0001									HR: HR 0,760 (0,582 – 0,993)/ P < 0,0219																QLQ-C30
[truncated: 31 more columns]

## Sheet: DATABASE
Criteria	Evaluator	Identification EPAR #	Product (active)	Product (Brand)	Indication (tumour)	Orphan status	Type of authorization	Speed tumor growth	% Metastasized	Expected survival 5-years	Overall Survival	Physical function and general health (SF36 - EQ5D - eortc qlq-c30)	Prevalence	Incidence	Treatment options	Type of standard of care	Progression Free Survival active	Progression Free Survival difference to control	Objective Response Rate (RECIST/MRD) active	Objective Response Rate (RECIST/MRD) difference to control	Complete response (RECIST/MRD) active	Complete response (RECIST/MRD) difference to control	Partial response (RECIST /MRD) active	Partial response (RECIST /MRD) difference to control	Long responders	OS trials active	OS trials difference to control	Any AEs active	Any AEs difference to control	Non-Fatal SAEs (>3) active	Non-Fatal SAEs (>3) difference to control	Fatal AEs (Grade 5) active	Fatal AEs (Grade 5) difference to controls	Dosage adjustment due to AEs active	Treatment discontinuation (due to AEs) active	Treatment discontinuation (due to AEs) difference to control	Median duration of treatment	Other Indications (patients exposed)	Other Indications (number of indications)	HRQoL	Impact on Autonomy	Frequency of dosing	Time unit	Variable treatment guideline	Time of treatment	Easy to Use / Mode & Setting of Administration	Combined chemotherapy	Magnitude of Clinical benefits MCBS	MCBS setting Curative/Non Curative
EPAR	GP/RV	5	Niraparib -2	Zejula	Ovarian cancer		Orphan designation			0.29	>24		42,9 / 100.000	7,5 / 100.000	with	Directed agents	11.3	6.6	Not evaluated	Not evaluated	Not evaluated	Not evaluated	Not evaluated	Not evaluated	Not mentioned	Not reached	_	1	0.04	0.74	0.51	0		Yes	0.15	0.13	9 (median) and 11 (mean)	854	none	Not Identified	No	Once		Other	Other	Oral	Without	3	Non Curative
Database	GP/RV	5	Niraparib	Zejula	Ovarian cancer	Orphan designation	Full approval	NA	0.7	0.29	>24	NA	42.9	7.5	with	Directed agents	11.3	6.6	NA	NA	NA	NA	NA	NA	Not applicable	Not reached	NA	1	0.04	0.74	0.51	0	0	Yes	0.15	0.13	9	854	0	NA	No	Once	day	Other	Other	Oral	Without	3	Non Curative
Unit	Of Time										months						months	months																			cycles					Day
Source / comments	Source / Comments	EMEA/H/C/004249/0000			C. de ovari- manteniment, no restringit per BRCA				IPT: 60-78% de les pacients debuten amb estadis III-IV.	IPT: 47% de supervivència global pel càncer d'ovari. Del 29% en estadi avançat, que és la indicació.	EPAR, pàgina 10: SG olaparib per BRCA germinal +: 34,9 mesos. Tot i que les portadores de mutacions BRCA tenen millor pronòstic (IPT niraparib).	Pivot, material supplementari: EQ-5D-5L: consta el valor basal i també el valor al llarg dels cicles fins a post pregressió. Per cohorts separades segons la mutació BRCA, no hi ha dades del conjunt de la població	IARC, prevalença càncer ovari en Espanya, ambdós sexes, 2020 a 5 anys ajustada per edat. 10204 casos	IARC, incidencia càncer ovari en Espanya, ambdós sexes, 2020. Incidencia crua 14,8 / 100.000 hab	Olaparib está finaciat en el moment d'evaluació per la mateixa indicació, però restringit a BRCAmutat.	Olaparib per BRCA germinal mutat.	11,3 vs 4,7 (control) per a tota la població del estudi (BRCAm y BRCAwt, que es la població de la inidcació)	IPT: HR: 0,38 (0,3 ; 0,48), p<0,0001	És tractament de manteniment	_	És tractament de manteniment	_	És tractament de manteniment	_	IPT pàgina 3: 44,4% exposat al tractament durant 12 mesos o més	IPT: HR: 0,73 (0,48 ; 1,12), p=0,1545	No aplica	100% vs. 96% (control)		EPAR, pàgina 91: grade 3-4: 74% vs 23% (control)		IPT: No se comunicaron muertes por EA durante el tratamiento, si bien, durante el seguimiento del estudio hubo 3 muertes por síndrome mielodisplásico o leucemia mieloide aguda (1 en el grupo de niraparib y 2 en el grupo placebo). 2 de las muertes (1 en cada grupo) fue en relación con la medicación a juicio del investigador.	No aplica	IPT: 67% van reduir la dosi en el grup niraparib. El 69% va interrompre el tractament. EPAR: pàgina 91: 69% reduccions de dosi, 67% interrupcions Pivot (material suplementari): 66,5%.	Epar, pàgina 91: 15% vs. 2%.(control)		IPT i EPAR pàgina 90: exposició a niraparib 9 cicles de tractament de 28 dies. Mediana: 250 dias olaparob vs 163 dias placebo Mitjana: 299.9 dies vs 212.5 dies placebo	EPAR pàgina 90: 854 pacients han rebut una dosi de niraparib: 367 pacients de l'estudi pivot en braç experimental (total pacients del pivot 546, braç experimental i control)	no altres indicacions aprovades	Pivot, material supplementari: EQ-5D-5L: consta el valor basal i també el valor al llarg dels cicles fins a post pregressió. Per cohorts separades segons la mutació BRCA, no hi ha dades del conjunt de la població		300 MG/ DAY (3 capsules de 100mg) en cicles de 28 dies.		No	Up to progression
EPAR	GP/RV	11	Ribociclib	Kisqali	Advanced breast cancer		centralized authorization	SLP abemaciclib vs SLP palbociclib	0.05	0.333333	>24	64.5	577,3 / 100.000	74,4/100.000 habitants	with	Directed agents	25.3	9.3	0.407	0.132	2.7%	0.6%	0.38	0.126	No mencionat	Not Reached	_	0.985	0.015	0.812	0.485	0.006	0.006	Yes	0.15	0.12	13.0 (median) and 11,8 (mean)	568	none		No	Once		No	Up to progression	Oral	Without	3	Non Curative
Database	GP/RV	11	Ribociclib	Kisqali	Breast cancer	No orphan	Full approval	15	0.05	0.333333	>24	64.5	577.3	74.4	with	Directed agents	25.3	9.3	0.407	0.132	0.027	0.06	0.38	0.126	Not mentioned	Not reached	NA	0.985	0.015	0.812	0.485	0.006	0.006	Yes	0.15	0.12	13	568	0	0	No	Once	day	No	Up to progression	Oral	Without	3	Non Curative
Unit	Of Time										months		5 years	1 year			months	months																			months					Day
Source / comments	Source / Comments	EMEA/H/C/004213/0000			C. de mama avançat, RH+, HER2-, combinat amb inh de l'aromatasa			SLP és de 10 a 20 mesos, depenenet del volumen mestatàtic i localització. IPT, pàg 1.	IPT: 5% dels cancers de mama diagnosticats són metastàtics	IPT, pàg 1. Segons l'EPAR, pàgina 8: supervivència a 5 anys del 25% pel c. Mama metastàtic.	epar pàgina 8: mediana de supervivènvia global pels RH+/HER2-: 2,5-4 anys.	EPAR pàgina 67: EORTC QLQ-C30: dades basals: (64.5 [20.25]) intervenció VS 64 [21.07] control)	IARC, prevalença càncer de mama, a 5 anys, ajustada per edat.	IPT: 201, 32825 casos nou de càncer de mama. 74,4 per cada 100.000 habitants. IARC: 77,5/100000 habitants incidència ajustada per edat.2020. La tasa crua és 143,4 / 100.000		Palbociclib o abemaciclib combinats amb un inhibidor de l'aromatasa. Teràpia hormonal amb inhibidors de l'aromatasa i fulvestrant.	Seguiment de 24 mesos: 25,3 vs. 16,0 IPT, monaleesa 2	HR 0,568 (0,457 ; 0,704), p= 9,63 x10-8	EPAR, página 66: hi ha dades més actualitzades:Taxa de resposta global: 42,5 vs 28,7%. Però no desglosa el % de RC o RP. S'agafen les dades prèvies del pivot, ja que els % tampoc varien massa més: 40,7% vs. 27,5%.		PIVOt: 2,7% vs2.1%		Pivot: 38.0% vs. 25,4%		EPAR, pàgina 86: 58,1% exposats durant més de 12 mesos al grup experimental. 13,2% més de 18 mesos.	EPAR, pàgina 65: No assolida vs. 33.0 mesos. HR : 0,746 (0,517 ; 1,078) IPT: dades immadures, 15% d'esdeveniments pel grup intervenció	No aplica	EPAR, pàgina 87: 98,5% vs. 97,0% (control)		IPT: EA grau 3-4: 81,2% vs. 32,7% (control)		EPAR, pàgina 87: morts: 6,9% (23) vs. 5.8% (19). Durant el tractament 0.9% (3) vs. 0.3% (1). Pàgina 98: morts ambEA com a ppal causa: 0,6% (2) intervenció vs 0 grup placebo		IPT: reduccions de dosi: 50,6% vs. 4,2% EPAR, pàgina 87: EA que van requerir interrupcions o reduccions e dosi: 73,1% vs. 15,8%	IPT: interrupcions del tractament: 7,5% vs 2,09% EPAR, pàgina 87: 155 vs. 3.0%		EPAR pàgina 85: mediana d'exposició al tractament amb ribo + letroxol és de 13 mesos. Exposició a ribociclib de 12.2 mesos. Mitja: 11,8 mesos ribociclib i 11,1 control	EPAR: PÀGINA 8: 568 pacients exposats a ribocilib a la dosi autoritzada. 381 exposats.	no altres indicacions aprovades	EPAR, pàgina 67: diferència entre grups al final de l'estudi, per l' EORTC QLQ-C30: -1.50 ( 95% CI: (-4.0, 1.0))		600mg/dia per 21 dies, amb 7 dies de descans. Cicles de 28 dies.					Combinat amb inhibidors de l'aromatasa o fulvestrant	Para l'assaig MONALEESA-2 (con letrazol)
EPAR	GP/RV	38	Abemaciclib	Verzenios	Advanced breast cancer		centralized authorization	SLP ribociclib SLP palbo en 2ª línea	0.05	0.25	>24	65	577,3 / 100.000	74,4/100.000	with	Directed agents	28	13	0.497	13.3%	0.027	0.021	0.47	0.106	No mencionat	NA	NA	0.945	0.38	0.514	0.446	0.024	0.012	Yes	0.165	0.134	16	900	none	Diferència en el canvi respecte la basal, entre grups: -4,4 en perjudici a Abemaciclib	No	Twice		No	Up to progression	Oral	Without	3	Non Curative
Database	GP/RV	38	Abemaciclib	Verzenios	Breast cancer	No orphan	Full approval	16.4	0.05	0.25	>24	65	577.3	74.4	with	Directed agents	28	13	0.497	0.133	0.027	0.021	0.47	0.106	Not mentioned	NA	NA	0.945	0.38	0.514	0.446	0.024	0.012	Yes	0.165	0.134	16	900	0	-0.044	No	Twice	day	No	Up to progression	Oral	Without	3	Non Curative
Unit	Of Time										months		5 years	1 year			month	month																			month					Day
Source / comments	Source / Comments	EMEA/H/C/004302/0000			C. de mama, avançat, RH+. HER2- combinat amb hormonoteràpia en primera L o posteriors				IPT: 5% dels cancers de mama diagnosticats són metastàtics	EPAR, pàgina 10: supervivència als 5 anys del c. Mama metastàtic del 25%	EPAR, pàgina 10: mediana de supervivènvia global pels RH+/HER2-: 2,5-4 anys.	EPAR, pàgina 68: EORTC QLQ-C30: 65 experimental vs. 59 el grup placebo.	IARC, prevalença càncer de mama, a 5 anys, ajustada per edat.	IPT: 201, 32825 casos nou de càncer de mama. 74,4 per cada 100.000 habitants. IARC: 77,5/100000 habitants incidència ajustada per edat.2020. La tasa crua és 143,4 / 100.000 Segons l'EPAR pàgina 9: incidència cancer de mama europa 2012: 94.2/100 000		Palbociclib i ribociclib en primera línia. IPT i EPAR: Palbociclib en segona línia o en pacients prèviament tractades amb teràpia hormonal, fulvestrant, o qt, o la combinació exemestano + everolimus	IPT, Pel Monarch 3 : 28 mesos vs 15 mesos HR: 0,54 (0,41 ; 0,72)		EPAR, pàgina 67: 49,7 vs. 36.45. Segons el protocol d'estudi, mesurat per RECIST (https://www.clinicaltrials.gov/ProvidedDocs/21/NCT02246621/Prot_003.pdf)		IPT: RC 2,7 vs 0,6%		IPT:RP: 47, 0 vs 36,4 pel monarch 3.			No assolida IPT: monarch 3: HR: 1,05 (0,68 ; 1,63)	No aplica	IPT: 94,5% vs. 56,5% EPAR: pàgina 100: 98,8% vs. 94,4%		ipt grau 3 o mes: 51,4% vs. 6,8% EPAR, pàgina 100: 61,8 vs. 26,1%		EPAR, pàgina 100: 2, 4% (8) vs. 1.2 (2) . Pàgina 102: Morts totals durant el tt i en els 30 dies posteriors van ser 15 en el grup experimental, 11 d'elles degudes a EA. No surten les de placebo.		IPT pàgina 99: 47% vs 6$	EPAR pàgina 100: 16,5% vs. 3,1%		EPAR, pàgina 99: mediana de cicles rebut en el Monarch 3: 16 cicles, de 28 dies.	cancer de mama, tres estudis monarch. 488 de l'estudi monarch 3, 327 braç experimental	no altres indicacions aprovades	EPAR PÀGINA 58: EORTC QLQ-C30 global: diferència respecte la basal i entre grups:		150mg dos cops al dia, continuat en cicles de 28 dies.					combinat amb inhibidors de l'aromatasa o fulvestrant
EPAR	GP/RV	38 (dup)	Abemaciclib (duplicat)	Verzenios (duplicat)	Advanced breast cancer		centralized authorization		0.05	0.25	>24	64	577,3 / 100.000	74,4/100.000	with	Others	16.9	7.6	0.352	0.191	0.031	0.027	0.321	0.164	Not mentioned	46.7	0.094	0.986	0.094	0.626	0.388	0.014	0.01	Yes	0.068	0.05	13 (median)	900	none	-1.5	No	Twice		No	Up to progression	Oral	Without	4	Non Curative
Unit	Of Time										months		5 years	1 year			months	months								month	month										cycles					Day
Source / comments	Source / Comments	EMEA/H/C/004302/0000			C. de mama, avançat, RH+. HER2- combinat amb hormonoteràpia en primera L o posteriors				IPT: 5% dels cancers de mama diagnosticats són metastàtics	EPAR pàgina 10: supervivència als 5 anys del c. Mama metastàtic del 25%	EPAR, pàgina 10: mediana de supervivènvia global pels RH+/HER2-: 2,5-4 anys.	EPAR: pàgina 79: EORTC QLQ-C30: 64 en els dos grups	IARC, prevalença càncer de mama, a 5 anys, ajustada per edat.	IPT: 201, 32825 casos nou de càncer de mama. 74,4 per cada 100.000 habitants. IARC: 77,5/100000 habitants incidència ajustada per edat.2020. La tasa crua és 143,4 / 100.000 Segons l'EPAR pàgina 9: incidència cancer de mama europa 2012: 94.2/100 000		Palbociclib i ribociclib en primera línia. IPT i EPAR: Palbociclib en segona línia o en pacients prèviament tractades amb teràpia hormonal, fulvestrant, o quimioteràpia, o la combinació exemestano + everolimus	IPT Monarch 2 anàlisi final de SLP: 16,9 mesos vs. 9,3mesos (control)	HR:0,553 (0,449 ; 0,681)	IPT: Pel Monarch 2, la TRO va ser de 35,2 VS. 16,1 (control) Segons el protocol de l'estudi, mesurat per RECIST (https://www.clinicaltrials.gov/ProvidedDocs/03/NCT02107703/Prot_004.pdf)	EPAR: pàgina 79: 3,1 vs 0,4% (control)			EPAR pàina 79: 32,1 vs. 15,7			IPT i EPAR (pàgina 87). dades en el punt de tall: NA vs. NA, dades de juny de 2019: Pel Monarch 2: 46,7 mesos vs. 37,3 mesos.	HR 0,854 ( 0,598 ;1,221) p=0,389	EPAR, pàgina 107: 98,6% vs. 89,2% (control)		ipt: grau 3-4: 62,6% vs. 23,8% (control)		IPT: 7 vs. 2 EPAR: 1,4%(6) vs. 0,4% (1). Es mostren les de l'epar que hi ha el número concret.		EPAR pàgina 106: reduccions de dosi per EA 42, 9%	IPT: 6,8 vs. 1,8% (control)		Epar pàgina 106: número de cicles rebuts: 13 vs 9 (control), que coincideix amb el nombre de mesos: 13 mesos vs 9 mesos (control).	900 pacients han rebut abemaciclib en combinació amb teràpia hormoonal per cancer de mama, tres estudis monarch. 664 de l'estudi monarch 3, 441 braç experimental.	no altres indicacions aprovades	EPAR PÀGINA 79: EORTC QLQ-C30 global: diferència respecte la basal i entre grups (enperjudici a abemaciclib)		150mg dos cops al dia, continuat en cicles de 28 dies.					Combinat amb inhibidors de l'aromatasa o fulvestrant	4 en combinació amb fulvestrant i 3 en combinació amb inhibidor de l'aromatasa
EPAR	GP/RV	45	Neratinib	Nerlynx	Breast cancer		centralized authorization	91,9 control del pivotal	0.05	0.7	Not identified	FACT-B total score: 114.4 (16.0) Nera EQ-5D index: 0.86 (0.16) Nerat EQ-5D health state: 81.5 (13.2) Nera	577,3 / 100.000	74,4/100.000	with	Directed agents	0.942	0.023		Not evaluated	Not evaluated	Not evaluated	Not evaluated	Not evaluated	Not identified	Not reached		0.985	0.104	0.497	0.366	0.001	0	Yes	0.276	0.222	11,6 (median) and 8,23 (mean)	1710 pacients		(FACT-B, −2·9 [95% CI −3·7 to −2·0]; EQ-5D, −2·7 [–3·7 to −1·7]).	No	Once		No	Fixed	Oral	Without	A	Curative
Database	GP/RV	45	Neratinib	Nerlynx	Breast cancer	No orphan	Full approval	91.9	0.05	0.7	NA	81.5	577.3	74.4	with	Directed agents	11.3	6.6	NA	NA	NA	NA	NA	NA	Not identified	Not reached	NA	0.985	0.104	0.497	0.366	0.001	0	Yes	0.276	0.222	11.6	1710	0	-0.0195946	No	Once	day	No	Fixed	Oral	Without	A	Curative
Unit	Of Time											Mean (SD)	5 years	1 year																							months					Day
Source / comments	Source / Comments	EMEA/H/C/004030/0000	Neratinib		C. de mama, HR (+) i HER2 (+)				IPT i informe harmonització	EPAR pàg 9: SG a los 10 años de 70% en Europa. 83% malaltia local, 62% malaltia regional.		FACT-B total score: 114.4 (16.0) Neratinib vs 114.4 (16.1) Placebo EQ-5D index: 0.86 (0.16) Neratinib vs 0.86 ( 0.18) placebo EQ-5D health state: 81.5 (13.2) Nera vs 81.6 (13.4) placebo Dels anexes de l'assaig pivotal.	IARC, prevalença càncer de mama, a 5 anys, ajustada per edat.	IPT: 201, 32825 casos nou de càncer de mama. 74,4 per cada 100.000 habitants. IARC: 77,5/100000 habitants incidència ajustada per edat.2020. La tasa crua és 143,4 / 100.000 Segons l'EPAR pàgina 9: incidència cancer de mama europa 2012: 94.2/100 000	El tractament estàndard seria tractament hormonal, però cap fàrmac ha sigut aprovat per a la indicació de tractament adjuvant perllongat.	Inhibidors de l'aromatasa o tamoxife durant 5 anys com a adjuvància, després d'un any de trastuzumab.	Variable: supervivència lliure de malaltia invasiva: taxa de pacients amb esdeveniment. EPAR, pàgina 86: 94,2% vs 91.9 % HR 0,66 (0,49 ; 0,90)	% de pacients	No s'avalua a l'estudi principal. A l'EPAR, pàg 112, hi ha un estudi de suport amb dades de TRO. No he trobat si són segons RECIST,.... TRO global del 25,4%. En pacients que han rebut tractament amb trastuzumab prèviament la resposta és similar a la global, tant expresin receptors hormals com no, mentre que sense tractament previ amb trastuzumab, la TRO és més alta, del 61%							EPAR pàg 112:An OS analysis has not been conducted because the required number of deaths has not been reached.		EPAR, pàgina 121: 98,5 vs. 88,1% (control)		grau 3-4: EPAR, pàgina 121: 49,7% vs. 13,1% (control)		EPAR, pàgina 124- 125: 2 morts al grup neratinib i una al grup placebo (0,1 vs 0.1)		EPAR,pàgina 136: 31,3% vs2,5%	EPAR pàgina 121: 27,6 vs. 5,4%		EPAR mediana: 120 dies; 11,6 mesos vs 11,83 placbeo media: 8,23 vs 10,7 (placebo)	"A total of 2079 patients have been exposed to neratinib monotherapy and 816 patients to neratinib combination therapy. 1710 patients were exposed with breast cancer at proposed dose " No s'especifica el número de pacients per cada estudi. Només s'especifica que el pivot representa el 82,3% dels pacients inclosos en l'avaluació de la seguretat.	Estudiat en c- mama metastàtic, tot i que no té la indicació	Epar pàgina 95, parla de l'escala EQ-5D però no dóna valors concrets. Assaig pivot: The adjusted mean difference of changes in quality of life between the neratinib and placebo groups was greatest at month 1 for both measures (FACT-B, −2·9 [95% CI −3·7 to −2·0]; EQ-5D, −2·7 [–3·7 to −1·7]). Neither difference was deemed clinically important for the respective measures. After the first month, the …		240 mg un cop al dia			un any de tractament			Escala per tractaments curatius
EPAR	GP/RV	52	Rucaparib	Rubraca	Advanced breast cancer		Conditional approval	13.6	0.05	0.3	Not identified	Not identified	42,9 / 100.000	7,5 / 100.000	with	Chemotherapy	10	_	0.717	_	0.085	_	0.462	_	Not mentioned	Not reached		1	_	0.671	_	0.042	_	Yes	0.189	_	224 (median)	409	none	Not identified	No	Twice		No	Up to progression	Oral	Without	3	Non Curative
Database	GP/RV	52	Rucaparib	Rubraca	Ovarian cancer	No orphan	Conditional approval	13.6	0.05	0.3	NA	NA	42.9	7.5	with	Chemotherapy	10	NA	0.717	NA	0.085	NA	0.462	NA	Not mentioned	Not reached	NA	1	NA	0.671	NA	0.042	NA	Yes	0.189	NA	7.5	409	0	NA	No	Twice	day	No	Up to progression	Oral	Without	3	Non Curative
Unit	Of Time							months									months																				days					Day
Source / comments	Source / Comments	EMEA/H/C/004272/0000			C. Ovari BRCA +, 3a Linea (tractament)	initially orphan (2012), withrawn orphan status at MAH request on authorization in 2018		IPT: DLP + trabectIdina mostra una SLP de 7,3 mesos pacients amb c. Ovari tractades amb un únic règim de QT basat en platí. 9,2 mesos per les pacients sensibles a platí i de 13, 6 mesos pels BRCA mutats (anàlisi retrospectiu).	60-70% són diagnosticats en etpaes avançades (III-IV)	IPT: SG a 5 anys és del 47%, i disminueix al 29% en estadi avançat. EPAR: Advanced stage disease is associated with a 5-year survival rate of only 30% to 40%.			IARC, prevalença càncer ovari en Espanya, ambdós sexes, 2020 a 5 anys ajustada per edat. 10204 casos	IARC, incidencia càncer ovari en Espanya, ambdós sexes, 2020. Incidencia crua 14,8 / 100.000 hab		IPT: no hi ha tractaments autoritzats específicament per la tercera línia o posteriors.Tot i que es proposa com alternativa la Doxorubicina liposomal, pegilada (DLP) ,el topotecan, trabectedina i DLP o trabectedina + paclitaxel	IPT: No hi ha comparador: 289 dies EPAR, pàg 90: 10 mesos (7,1 ; 12,5)	No hi ha braç control	IPT: només hi ha una cohort: 71,7% confirmada per RECIST segons l'investigador, que és la varibale principal de l'estudi conjunt. EPAR pàgina 87: ORR per la població global confirmada per RECIST per un comitè independent 44,3%, 7,5% de RC i 36,8% de RP.	No hi ha braç control	No està basat en criteris RECIST	No hi ha braç control	No està basat en criteris RECIST	No hi ha braç control	Durada de la resposta de 9,6 mesos. El 69, 2% recibió más de 6 meses de tratamiento. 25% de las pacientes BRCAm recibió más de 12 meses de tratamiento. EPAR. Pàg 115.	No assolida. Pàgina 99 EPAR: NA (21,7 ; NA)	no aplica	EPAR, pàgnina 118: pels 143 pacients amb BRCA mutat, la versió actualitzada . No coincideix amb els 106 de la població d'eficàcia, perqué els 37 restants van rebre solament 1 linea de quimio prèvia i no complien el criteri de la indicació. Para la població amb càncer d'ovari en general ( 377) va ser del 100%	No hi ha braç control	EPAR pàgina 118: AE grau 3-4 versió actualitzada las 120 dies en població BRCAm. Per a l apoblació de càncer d'ovari (377) va ser 62,6%	No hi ha braç control	EPAR pàgina 118: AE with outcome of death versió actualitzada las 120 dies en població BRCAm. Per a la població de càncer d'ovari (377) va ser 2,7%	No hi ha braç control	EPAR pàgina 117: 50,3%, només reduccions de dosi.	EPAR pàgina 118: AE leading to discontinuation: versió actualitzada las 120 dies en població BRCAm. Per a la població de càncer d'ovari (377) va ser 18,6%	No hi ha braç control	Pels pacients BRCA mutat. (Amb una o més línies prèvies de QT. Total pacients 143). Per a la població general 168 dies.	EPAR pàgina 115: 409 van rebre la dosi autoritzada de rucaparib tant per càncer d'ovari com pàncrees. 377 pacients amb càncer d'ovari avançat, dels quals 143 amb BRCA+. 32 pacients tenien un cancer sòlid diferent a l'ovari.	no altres indicacions aprovades	No s'identifiquen al IPT ni a l'EPAR; no van ser evaluades pel assaigs.		600mg dos cops al dia, continuat
EPAR	GP/RV	73	Talazoparib	Talzenna	Advanced breast cancer			SLP olaparib: 19,3	0.05		12 to 24	61.9	577,3 / 100.000	74,4/100.000	with	Directed agents	8.6	3	0.626	0.354	5,5,%	0.055	0.571	0.299	Not mentioned	22.3	2.8	0.986	0.01	0.675	0.04	0.021	0.011	Yes	0.045	0.011	6,1 (median) and 8,4 (mean)	494	none	EORTC QLQ-C30: 8.4 [95% CI: 4.6, 12.3]; p<0.0001).	No	Once		No	Up to progression	Oral	Without	4	Non Curative
Database	GP/RV	73	Talazoparib	Talzenna	Breast cancer	No orphan	Full approval	19.3	0.05	0	12-24	61.9	577.3	74.4	with	Directed agents	8.6	3	0.626	0.354	0.055	0.055	0.571	0.299	Not mentioned	22.3	2.8	0.986	0.01	0.675	0.04	0.021	0.011	Yes	0.045	0.011	6.1	494	0	0.084	No	Once	day	No	Up to progression	Oral	Without	4	Non Curative
Unit	Of Time							months			months		5 years	1 year			months	months								months	months										months					Day
Source / comments	Source / Comments	EMEA/H/C/004674/0000			C. Mama avançat, BRCA+, HER 2-, en 2a linea			Olaparib es considera la millor alternativa.			Estudi pivot d'olaparib olimpi AD: SG de 19, 3 mesos. Olaparib es considera la millor alternativa	EPAR, pàgina 83: EORTC-QLQ-c30, BASAL: 61.9 [95% CI: 59.0, 64.7] vs 60.9 [95% CI: 56.9, 64.9]	IARC, prevalença càncer de mama, a 5 anys, ajustada per edat.	IPT: 201, 32825 casos nou de càncer de mama. 74,4 per cada 100.000 habitants. IARC: 77,5/100000 habitants incidència ajustada per edat.2020. La tasa crua és 143,4 / 100.000 Segons l'EPAR pàgina 9: incidència cancer de mama europa 2012: 94.2/100 000		EPAR pàgina 12: olaparib, capecitabina, eribulinai quimioteràpia basada en platí.	EPAR, pàg 79: 8,6 vs. 5,6 (control)	HR 0,542 (0,413 ; 0,711) p<0,0001	EPAR, pàgina 81-82.Dades no confirmades pel comitè independent, ja que no era un criteri necessari: 62,6% vs 27,2 % (control) Dades confirmades pel comitè independent: 50,2% vs 18,45 (control)		EPAR, pàgina 82. Dades no confirmades pel comitè independent, ja que no era un criteri necessari: 5,5% vs. 0% (control). Dades confirmades pel comité indpendent: 5,5% vs 0% (control)		EPAR, pàgina 82, dades no confirmades pel comitè independent, ja que no era un criteri necessari: 57,1 vs 27,2 (control) Dades confirmades pel comitè: 44,7% vs 18.4% (control)		EPAR, pàg 106: 18,5% dels pacients van estar exposats al tractament igual o més de 12 mesos.	EPAR, pàg 81-82: 22,3 mesos vs. 19,5 (control)	HR: 0,861 (0,547 ; 1,060)	EPAR, pàg 108: 98,6 vs. 97,6% (control)		EPAR, pàgina 108: grau 3 o 4: 67,5% vs 63,5% (control)		EPAR, pàg 108: 2,1% vs 3,2% (control).		EPAR, pàg 107: 52,1% vs. 49,1% (control).	EPAR pàg 108: 4,5% vs 5,6% (control).		EPAR pàg 106: Mediana de 6,1 mesos vs. 3,9 mesos (control). Media: 8,4 vs. 4,5 mesos (control).	EPAR, pàg 106: 494 pacients van rebre la dosi de talazoparib 1mg/dia, 286 de l'estudi pivot, amb 286 al braç experimental. 494 pacients de 11 estudis, però no especifica les indicacions.	no altres indicacions aprovades	EPAR, pàgina 83: parla de l'escala EORTC QLQ-C30, peò no dona valors concrets. The difference between the 2 treatment arms in Global Health Status/QoL was 8.4 [95% CI: 4.6, 12.3]; p<0.0001). Based on interpretation from the 95% CIs, the overall change from baseline scores in Global Health Status/QoL was 3.0 [95% CI: 1.2, 4.8] within the talazoparib arm versus -5.4 [95% CI: -8.8, -2.0]) in the con…		1mg/dia, continuat
EPAR	GP/RV	35	Encorafenib	Braftovi	Advanced melanoma		centralized authorization	SLP vemura/cobimetinib: 12,3	10-20%	0.17	22-26	66.72		8/100.000	with	Directed agents	14.9	5.3	0.63	0.125	0.08	0.03	0.55	0.1		33.6	10.1	0.989	0.006	0.578	0.095	0.102	0.028	Yes	0.125	0.016	11,7 (median)				Yes	Once		No	Up to progression	Oral	Without	4	Non Curative
Database	GP/RV	35	Encorafenib	Braftovi	Melanoma	No orphan	Full approval	12.3	0.15	0.17	22-26	66.72	NA	8	with	Directed agents	14.9	5.3	0.63	0.125	0.08	0.03	0.55	0.1	Not mentioned	33.6	10.1	0.989	0.006	0.578	0.095	0.102	0.028	Yes	0.125	0.016	11.7	1495	0	0	Yes	Once	day	No	Up to progression	Oral	Without	4	Non Curative
Unit	Of Time							months			months						month									months											months					Day
Source / comments	Source / Comments	EMEA/H/C/004580/0000			Melanoma, avançat.			IPT cobimetinib. Mirar EPAR para la combinació dabra/trame, la variable principal és taxa relapsed free survival (mediana no assolida) Pembro: SLP // Relapse free survival: dabrafenib/trametinib. 40% SLP pembro: administrado cada 3 semanas (4,1, median) SLP nibo: 6,9	EPAR, pàgina 9: 10-20% són metastàtics	EPAR, pàgina 9-10: supervivència a 10 anys, del 75-85%. Supervivència a 5 anys, 17%. Si no es tracta:6-9 mesos	EPAR, pàgina 10-11: amb els inhibidors de BRAF i Mek, SG de 22-26 mesos en melanoma metastàtic, BRAF mutat.	EPAR pàgina 95: basal: EORTC QLQ-C30	IARC: Prevalença a 5 anys, en 2020, 42/100.000	EPAR, pàg9: 123,135 nous casos al 2012, a Europa. A les zones mediterrànies, la icnidència varia entre el 3-5/100.000 casos a l'any. IPT: Incidència a Espanya: 8/100.000, dels quals un 2% en estadis avançats. Iarc: incidència ajustada per edat melanoma 2020: 6,8/100.000. La incidència crua és de 12,3/100.000		IPT: inhibidor BRAF y un inhibidor MEK o la inmunoterapia con anti-PD1 (nivolumab o pembrolizumab). EPAR PÀGINA 10-11: Vemurafenib/cobimetinib, dabrafenib/trametinib	IPT: encora/binimetinib 14,9 nesis vs. 9,6 mesos HR: 0,75 (0,56 ; 1,00), p=0,051		IPT: RECIST, per revisió central: 63% vs. 50,5 per encorafenib en monoteràpia		8% vs 5%		55% vs. 45%			EPAR pàgina 91: 33,6 vs 23,5 HR 0,81 (0,61 ; 1,06), p = 0,0613		EPAR pàgina 117: 98,9% vs 99,5%		EPAR pàgina 117: 57,8% grau 3-4 vs. 67,3%		IPT: 10,2% vs 7,4%		IPT: ajust o interrupció:52,2% vs 71%	EPAR PÀGINA 118: 12,5 VS 14,1		IPT: 11,7 mesos vs. 7,1 mesos per encora sol	Epar pàgina 115-116: 1495 pacients exposats a encorafenib. Exposats a la dosi de 450mg un cop al dia i juntament amb binimetinib són: 274 (192 de la primera part de l'estudi pivot, 75 de l'estudi CLGX818X2109, i 7 pacients de l'estudi CMEK162X2110.		EPAR. PÀGINA 95: The median time to definitive 10% deterioration in the QLQ-C30 global health status scores was longer in the Combo 450 arm compared with the Enco 300 arm (14.7 months [95% CI 9.2, 18.4]), with a HR for the difference of 0.45 (95% CI 0.31, 0.65)		Encorafenib 450mg/dia + Binimetinib 45mg/12h
EPAR	GP/RV	37	Binimetinib	Braftovi	Melanoma		centralized authorization	SLP vemura/cobimetinib: 12,3 SLP: dabrafenib/trametinib	10-20%	0.17	22-26	66.72	42/100.000	8/100.000	with	Directed agents	14.9	5.3	0.63	0.125	0.08	0.03	0.55	0.1		33.6	10.1	0.989	0.006	0.578	0.095	0.102	0.028	Yes	0.125	0.016	11,7 (median)				Yes	Twice		No	Up to progression	Oral	Without	4	Non Curative
Database	GP/RV	37	Binimetinib	Mektovi	Melanoma	No orphan	Full approval	12.3	0.15	0.17	22-26	66.72	42	8	with	Directed agents	14.9	5.3	0.63	0.125	0.08	0.03	0.55	0.1	Not mentioned	33.6	10.1	0.989	0.006	0.578	0.095	0.102	0.028	Yes	0.125	0.016	11.7	864	0	0	Yes	Twice	day	No	Up to progression	Oral	Without	4	Non Curative
Unit	Of Time							months			months						month									months											months					Day
Source / comments	Source / Comments	EMEA/H/C/004580/0000			Melanoma				Epar pàgina 9: 10-20% són metastàtics	EPAR, pàgina 9-10: supervivència a 10 anys, del 75-85%. Supervivència a 5 anys, 17%. Si no es tracta:6-9 mesos	EPAR, pàgina 10-11: amb els inhibidors de BRAF i Mek, SG de 22-26 mesos en melanoma metastàtic, BRAF mutat.	EPAR pàgina 95: basal: EORTC QLQ-C30	IARC: Prevalença a 5 anys, en 2020, 42/100.000	EPAR, pàg9: 123,135 nous casos al 2012, a Europa. A les zones mediterrànies, la icnidència varia entre el 3-5/100.000 casos a l'any. IPT: Incidència a Espanya: 8/100.000, dels quals un 2% en estadis avançats. Iarc: incidència ajustada per edat melanoma 2020: 6,8/100.000. La incidència crua és de 12,3/100.000		IPT: inhibidor BRAF y un inhibidor MEK o la inmunoterapia con anti-PD1 (nivolumab o pembrolizumab). EPAR PÀGINA 10-11: Vemurafenib/cobimetinib, dabrafenib/trametinib	IPT: encora/binimetinib 14,9 nesis vs. 9,6 mesos HR: 0,75 (0,56 ; 1,00), p=0,051		IPT: RECIST, per revisió central: 63% vs. 50,5 per encorafenib en monoteràpia		8% vs 5%		55% vs. 45%			EPAR pàgina 91: 33,6 vs 23,5 HR 0,81 (0,61 ; 1,06), p = 0,0613		EPAR pàgina 117: 98,9% vs 99,5%		EPAR pàgina 117: 57,8% grau 3-4 vs. 67,3%		IPT: 10,2% vs 7,4%		IPT: ajust o interrupció:52,2% vs 71%	EPAR PÀGINA 118: 12,5 VS 14,1		IPT: 11,7 mesos vs. 7,1 mesos per encora sol	Epar pàgina 121: 864 pacients exposats a binimetinib (427 en monoteràpia i 437 combiant amb encorafenib). Fins a 2016: 2555 pacients han rebut almenys una dosi de binimetinib. 450 pacients va ser exposats a la dosi de 450mg un cop al dia i juntament amb binimetinib són pel tractament de melanoma metastàtic.		EPAR. PÀGINA 95: The median time to definitive 10% deterioration in the QLQ-C30 global health status scores was longer in the Combo 450 arm compared with the Enco 300 arm (14.7 months [95% CI 9.2, 18.4]), with a HR for the difference of 0.45 (95% CI 0.31, 0.65)		Encorafenib 450mg/dia + Binimetinib 45mg/12h
EPAR	GP/RV	4	Padeliporfin	Tookad	Prostate cancer		centralized authorization	4.5	0.1	0.846	>24	82	596.2	150,6 /100 000	with	Others	0.283	0.142	Not evaluated	Not evaluated	Not evaluated	Not evaluated	Not evaluated	Not evaluated	Not Mentioned	Not evaluated	Not evaluated	94.9%	0.398	0.218	0.121	0.005	0.005	No	1.0%	0.5%	_	518		0.7	Yes	Other		No	Fixed	Injection	Without	Not evaluated	Curative
Database	GP/RV	4	Padeliporfin	Tookad	Prostate cancer	No orphan	Full approval	4.5	0.1	0.846	>24	82	1118	150.6	with	Others	28.3	14.2	NA	NA	NA	NA	NA	NA	Not Mentioned	NA	NA	0.949	0.398	0.218	0.121	0.005	0.005	No	0.001	0.005	NA	518	0	0.7	Yes	Other	other	No	Fixed	Injection	Without	NA	Curative
Unit	Of Time							years			month			Dades de incidència crua en espanya																												Other
Source / comments	Source / Comments	EMEA/H/C/004182/0000			C. de Pròstata			IPT el temps mig fins a necessitar un tractament radical (progressió) en CP localitzat és de 4,5 anys	EPAR pàgina 8: 10% dels casos diagnòsticats són localment avançats o metatàtics IPT: al moment del diagnòstic, a Eruopa, el 15-20% estan en estadi avançat.	IPT: supervivencia relativa a los 5 años (84,6%)	IPT: Supervivència als 10 anys en pacients amb CProstata localitzat d'entre el 96-100%	EPAR pàgina 72: número d'onservacions basals per padeliporfina: 82.5 vs. 81.8 per la vigilància activa.	iarc: prevalença a 5 anys, homes, 2020: 596,2/100.000	Incidència ajustada per edad, 2020: 70,6/100.000 *EPAR pàgina 8: al 2012 420,000 nous casos de càncer de pròstata a Europa. *IPT: 30,000 casos de càncer de pròstat nous, al 2017. iarc: espanya, i		IPT: opcions terapèutiques del CP de baix risc: vigilància activa, tractament radical (prostatectomia radical, radioteràpia externa, braquiteràpia) i el tractament focal (ablació crioquirúrugica, ultrasons focalitzats d'alta intensitat o teràpies fotodinàmiques)	IPT: S'evalua el temps fins a progressió: 28,3 mesos pel grup actiu vs. 14,1 mesos.	Pàgina 82-83 EPAR: HR de temps fins a progressió ipsilateral: 0,17 respecte 0,34 per la vigilància activa HR 0,34; IC 95%: 0,24 - 0,46, p< 0,001 considera la població que compleix la indicació (post-hoc): temps fins a la progressió ipsilateral: HR0,11. Temps fins a la progressió global: 0,31	IPT: No es mesura la resposta segons RECIST. Es mesura el % de pacients lliures de càncer per biòpsia negativa al cap de 24 mesos: 49% vs.13,5%. L'ipt aporta dades de la població que compliria els criteris d'estudi, anàlisi post-hoc amb el 385 de la població: 45,0% vs. 10,3%						27.1% of patients in treatment group presented progression after 24 months. EPAR (65)			IPT pàgina 5: 94,95 vs. 55,1% (control)		IPT pàgina 5, grau 3-4: 21,8% vs. 9,7% (control)		Epar pàgina 102: 0,5% vs. 0 (IPT)		Dosi única.	Discontinuacoó del estudi. Dosi única.		No aplica perqué és intervenció unica.	EPAR pàgina 100: 948 pacients tractats amb padeliporfina, 430 amb indicació de càncer de pròstata. 391 amb la dosi de la indicació		EPAR pàgina 72: Canvi respecte la basal pel grup padeliporfina: -2,3 (-4,2 ; -0,4); respecte la vigilància activa: -3,0 (-5,0 ; -1,0). La diferència respecte la basal, entre grups és de 0,7 (-2,1 ; 3,4).	Administració a l'hospital amb les 6h posteriors estant en penombra a l'hospital, precaució amb l'exposció a la llum durant les 48 posteriors	Dosi única de 3,66mg/kg			Dosi única			No consta
Criteria	Evaluator	Identification EPAR #	Product (active)	Product (Brand)	Indication (tumour)			Speed tumor growth	% Metastasized	Expected survival 5-years	Overall Survival	Physical function and general health (SF36 - EQ5D - eortc qlq-c30)	Prevalence	Incidence	Treatment options	Type of standard of care	Progression Free Survival	Progression Free Survival	Objective Response Rate (RECIST/MRD)	Objective Response Rate (RECIST/MRD)	Complete response (RECIST/MRD)	Complete response (RECIST/MRD)	Partial response (RECIST /MRD)	Partial response (RECIST /MRD)	Long responders	Overall Survival	Overall Survival	Any Advers Events	Any Advers Events	Non-Fatal Serious Advers Events (>3)	Non-Fatal Serious Advers Events (>3)	Fatal Advers Events (Grade 5 AEs)	Fatal Advers Events (Grade 5 AEs)	Dosage adjustment due to adverse effects	Treatment discontinuation (due to AEs)	Treatment discontinuation (due to AEs)	Median duration of treatment	Other Indications (patienties exposed)	Other Indications (number of indications)	HRQoL	Impact on Autonomy	Frequency of treatment (how often is administered)		Variable treatment guideline	Time of treatment	Easy to Use / Mode & Setting of Administration	Combined chemotherapy	Magnitude of Clinical benefits MCBS	Curative/Non Curative
METRIC								% increase (in tumor volume during one month) - category according to OS data in trials	% patients	%	Months (median)	Score	n/100.000	n/100.000	With/Without alternative	Chemotherapy / Immunotherapy / Directed agents /Surgery / Radio/ Combined /Others / None	Months (median )	Months (difference)	% Patients (observed)	% Patients (difference)	% Patients (observed)	% Patients (diference)	% Patients (observed)	% Patients (difference)	Mentioned (%)	Months (median)	Months (difference)	% Patients (observed)	% Patients (difference)	% Patients (observed)	% Patients (difference)	% Patients (observed )	% Patients (difference)	Mentioned	% Patients (observed)	% Patients (difference)	Months	# patients	# Indications	Score	(Y/N)	time		(Y/N)	Fixed / Up to progression	Oral/Injection/intratechal	With/Without	ESMO SCALE	Curative / Non Curative
Definition								Time of duplication for solid tumours; time of duplication for hematological tumours. Single source such as Harrison's textbook or other source - to be specified	With metastasis at diagnosis; Cancer burden reports if the tumour is available : https://gco.iarc.fr/survival/survmark/	Survival expectation of indication as in https://gco.iarc.fr/survival/survmark/	Overall Survival is: less than 6 months, 6 to 12 months, 12 to 24 months, more than 24months. Check for disease in Cancer burden reports WHO at: https://gco.iarc.fr/survival/survmark/	Collect baseline value and maximum value for 100% health.	Proportion of cases in a given population at a given time	Number of new cases per population at risk in a given time period	The alternative is therapeutic abstention	Collect name of agents used, if any // radiotherapy// surgery - Use clinical guidance: SEOM/icopraxis/catsalut, ESMO guidance, ASCO guidance.	The median survival time during which patients have not experienced disease progression	The median survival time during which patients have not experienced disease progression	The proportion of patients that experience complete response and partial response	The proportion of patients that experience complete response and partial response	The proportion of patients that experience complete response	The proportion of patients that experience complete response	Reduced tumor burden but residual disease detectable	Reduced tumor burden but residual disease detectable	Mentioned (%)	The median time from treatment randomisation to death	The median time from treatment randomisation to death	The proportion of patients experiencing an adverse event	The proportion of patients experiencing an adverse event	The proportion of patients experiencing a Grade > 3	The proportion of patients experiencing a Grade > 3	The proportion of patients experiencing a Grade 5 adverse event	The proportion of patients experiencing a Grade 5 adverse event	Mentioned	The proportion of patients discontinuing treatment due to adverse events	The proportion of patients discontinuing treatment due to adverse events	Median and mean treatment duration	Number of potential patients for indications . Use size of exposed population as reported in EPAR	Number of indications	Score; If absent, record absence	Disruption of daily activities due to delivering of treatment: delivered in hospital site, in-hospital admission, imparired activities of daily life..	Normal duration of use; dose adminsitration by unit of time. Frequency of treatment (i ex every 6 months or monthly). When multiple, worse guideline for the patient.		Identify if the treatment guideline changes	Identify if the treatment includes a fixed number of cycles	Type of formulation	Treatment includes combination with chemotherapy	MCBS defined by ESMO; If unavailable, calculate - if more than one trial, calculate for pivotal	Curative: therapeutic intervention aimed to eradicate the disease; Non curative: unlikely to achieve tumour eradication,aimed to prolong survival and palliate symptoms.
EPAR	MO/DG	7	Midostaurin	Rydapt	LMC			3	NA	0.19	25.6	NA	0,1-0,3/100.000	4,2/100.000	with	Combined	Supervivència lliure d'esdeveniment: 8,2	5.2	NA	NA	0.589	0.054	NA	NA	0.51	74.7	49.1	1	NA	0.888	NA	0.026	0.005	Yes	0.031	0.018	34	>1800	advanced solid tumours, chronic lymphocytic leukaemia, non-hodgkin's lymphoma, etc	NA	No	Once		Once	Other	Oral	With	A	Non Curative
Database	MO/DG	7	Midostaurin	Rydapt	Chronic myeloid leukemia	Orphan designation	Full approval	3	NA	0.19	>24	NA	2	4.2	with	Combined	8.2	5.2	NA	NA	0.589	0.054	NA	NA	Yes	74.7	49.1	1	NA	0.888	NA	0.026	0.005	Yes	0.031	0.018	34	1800	2	NA	No	Once	day	Once	Other	Oral	With	A	Non Curative
Unit	Of Time							months			months						months	months								months	months										days					Day		Day
Source / comments	Source / Comments	molt poca info, hem mirat bastant el nostre IT						Control group PFS		Aged dependent: 50% < 60 years old; 3-8% > 60 years old. EPAR.	Informe tècnic		EPAR	IPT	EPAR	chemotherapy (idarubicina, citarabina, etopòsid, mitoxantrona) and allogeneic haematopoietic stem cell transplantation (ASCT)	Supervivència lliure d'esdeveniment. 95%CI: 5,4-10,7. HR: 0,78 [95%CI: 0,66-0,93] Aquest estudi te disease free survival or event free survival, no te PFS	Aged dependent: 50% < 60 years old; 3-8% > 60 years old. EPAR.				Control group: 53,5%			Percentatge de superivents +4anys	HR: 0,77 [95%CI: 0,63-0,95]							Control group: 2,1%	<2%	Informe tècnic	Control group: 1,3%	EPAR IPT: 42 (2-576)					del dia 8 al dia 21 de cada cicle de QT.		en monoteràpia de manteniment fins a recaiguda en aquells pacients amb RC (fins a un màxim de 12 cicles)	màxim 12 cicles en manteniment			form 1
EPAR	MO/DG	14	Inotuzumab ozagamicin	Besponsa	LLA			1.8	NA	0.085	<6	0.76	1-5/10.000	1,3/100.000	with	Combined	5	3.2	NA	NA	0.807	0.513	NA	NA	NA	7.7	1	0.944	-0.056	0.512	0.015	0.159	0.047	Yes	0.189	0.105	8.9	1207	NA	0.8	Yes	Other		Other	Other	Intratechal	Without	4	Non Curative
Database	MO/DG	14	Inotuzumab ozagamicin	Besponsa	Acute lymphoblastic leukemia	Orphan designation	Full approval	1.8	NA	0.085	<6	76	10	1.3	with	Combined	5	3.2	NA	NA	0.807	0.513	NA	NA	Not applicable	7.7	1	0.944	-0.056	0.512	0.015	0.159	0.047	Yes	0.189	0.105	8.9	1207	NA	0.8	Yes	Other	other	Other	Other	Intratechal	Without	4	Non Curative
Unit	Of Time							Months			Months	EQ-5D																									weeks			EQ-5D
Source / comments	Source / Comments							Median PFS SoC)		En adults amb primera recidiva 7-10%, faig promig		SoC	Orphanet	EPAR. Incidència crua		fludarabine/cytarabine/GCSF 4 cycles (4 set. Per cicle)// MXN/ara-c/metotrexat/cytarabine (4 cycles (14-20 days/cycle)// HIDAC-high dose cytarabine every 12 h up to 4 cycles (a second cycle was allowed)	HR: 0,452 [95%CI: 0,349-0,586]; p<0,0001	Control arm 1,8				Control arm: 29,4				HR: 0,77 [95%CI: 0,57-0,993; p<0,0105			Control group 100%	Dades IPT: eventos adversos graves comunicados	Control group 49,7		control group 11,2%			Control arm 8,4%						Day 0, day 8 and day 15 /3-4 weeks (Between 2 or 6 cycles depending on the possibility of transplantation (First cycle 3 o 4 weeks, following cycles 4 weeks)).		Depends on the objective (trasplantation vs non-trasplantation)	fixed but flexible depending on the response (between 2 or 3 cycles trasplantation or maximum of 6 cycles non trasplantation)			form 2a
EPAR	MO/DG	32	Mogamulizumab	Poteligeo	SS			3.1	NA	0.745	>24	NA	unknown	0.4-1/100,000	with	Combined	7.7	4.6	0.28	0.232	NA	NA	NA	NA	NA	not achieved	not achieved	0.973	-0.022	0.255	-0.094	0.016	-0.032	No	0.215	0.079	5.6	542	peripheral T-cell lymphomas	absence	Yes	Once		Once	Other	Injection	Without	NA	Non Curative
Database	MO/DG	32	Mogamulizumab	Poteligeo	Cutaneous T cell lymphoma	Orphan designation	Full approval	3.1	NA	0.745	>24	NA	10.3	0.4	with	Combined	7.7	4.6	0.28	0.232	0.043	0.043	0.189	0.141	Not applicabele	Not reached	NA	0.973	-0.022	0.255	-0.094	0.016	-0.032	No	0.215	0.079	5.6	542	1	NA	Yes	Once	week	Once	Other	Injection	Without	NA	Non Curative
Unit	Of Time							months									months	months																			months					Week		2 Weeks
Source / comments	Source / Comments							SLP control group		Micosis fungoide: 74,5% En estadis inicials la supervivència es similar que en població general			orphanet, IPT, EPAR	IPT		terapia fotodinàmica, radio, quimio. En malaltia avançada es pot tractar amb: quimio sitèmca, fotoferesis sola o amb interfero, o metotrexate, bexaroteno o retinoides i/o radi. Agents autoritzats a UE: bexaroteno, bleomicina, dexametasona, interfero alfa, brentuximab vedotn. Vorinostat grup control al phase III	(IC95%: 5,67 a 10,33) Effect estimate per comparison; HR:0,53 [95%CI: 0,41-0,69]; p<0,0001	SLP control group 3,1 month	CI95% 21,6 - 35	control: 4,8 (CI95%:2,2 - 9)						Effect estimate per comparison: HR: 0,93 [95%CI: 0,61-1,43] p=0,9439	43,93 months (43,57, -)		Control group 99,5		Control group: 34,9%		Control group: 4,8			Control group: 13,6%	<1 a 45.3 months	at least one dose (EPAR)	under study (EPAR)		60 minutes infusion	Setmanal el primer cicle i cada dues setmanes el cicles següents fins a progressió o toxicitat			up to progression
EPAR	MO/DG	44	Daunorubicin / Citarabine	Vyxeos	LMA			1.31	NA	0.21	<6	NA	13,6/100.00	3,5/100.000	with	Chemotherapy	2.53	1.22	0.477	0.144	37.3	11.7	10.5	2.8	Not mentioned	9.56	3.61	1	0	0.923	0.025	0.091	-0.032	Not Relevant	0.019	0.003	62	403	unknown		Yes	>2		Twice	Other	Injection	Without	NA	Non Curative
Database	MO/DG	44	Daunorubicin / Citarabine	Vyxeos	Acute myeloid leukemia	Orphan designation	Full approval	1.31	NA	0.21	<6	NA	13.6	3.5	with	Chemotherapy	2.53	1.22	0.477	0.144	0.373	0.117	0.105	0.028	Not mentioned	9.56	3.61	1	0	0.923	0.025	0.091	-0.032	Not Relevant	0.019	0.003	62	403	NA	0	Yes	>2	week	Twice	Other	Injection	Without	NA	Non Curative
Unit	Of Time							months			months															month	month										days					Week		Week	Other
Source / comments	Source / Comments							dades del grup control		Depen de l'edat, si s'estandarditza per edat surt del 19% (IPT)	dades del grup control					citostaticos convencionales citarabina i daunorubicina pauta 7+3	Supervivencia libre de eventos (2,07-5) HR: 0,74, 1-sided, p=0,011	Control group: 1,31 (1,08-1,6)		Control group 33,3		Control group 25,6	Respuesta completa con recuperación hematológica incompleta	Control group 7,7		HR: 0,69 [95%CI: 0,52-0,9] p=0,03	Control group: 5,95				control group: 89,8		control group: 12,3	Don't know!!!		Control group 1,6		403 received at least one dose			90 minuts infusió intravenosa	dia 1,3 i 5 fase inducció/ 1 i 3 segona inducció, 1 i 3 consolidació.		Segona inducció i consolidació	fixed (maxim 4 cicles, dos inducció i dos consolidació) or time to progression		its a combination itself
EPAR	MO/DG	54	Gemtuzumab ozogamicin	Mylotarg	LMA			16	NA	0.264	12 to 24	NA	NA	4,3/100.000	with	Chemotherapy	28	16.6	0.815	0.08	0.704	0.005	0.111	0.074	NA	27.5	5.7	0.985	0.043	0.87	0.045	0.061	0.01		0.313	0.24	12.14	2747	NA		Yes	>2		Once	Other	Injection	With	A
Database	MO/DG	54	Gemtuzumab ozogamicin	Mylotarg	Acute myeloid leukemia	Orphan designation	Full approval	16	NA	0.264	12-24	NA	11	4.3	with	Chemotherapy	28	16.6	0.815	0.08	0.704	0.005	0.111	0.074	Not applicable	27.5	5.7	0.985	0.043	0.87	0.045	0.061	0.01	Not Relevant	0.313	0.24	12.14	2747	NA	0	Yes	>2	week	Once	Other	Injection	With	A	Curative
Unit	Of Time							months			months															months											weeks					week		week
Source / comments	Source / Comments							SLP control		45,6%/7,1% pacients < 65 anys/pacients >65 anys, faig promig	21,8 month grup control			IPT, varia en funció de l'edat		daunorubicina + citarabina (3+7). Inducció i consolidació.	HR: 0,526 [95%CI: 0,362-0,764] p=0,0006	Control group: 11,4		Control group: 73,5		Control group: 69,9		Control group: 3,7		HR: 0,807 [95%CI: 0,596-1,093] p=0,1646	control group: 21,8		Control group:94,2		Control group: 82,5		Control group: 5,1			Control group:7,3						només una setmana durant la inducció primer cicle		Només un dia durant la consolidació (dia 1 de cada cicle de consolidació, màxim dos cicles)	fixed		daunorubicina + citarabina	form 1
EPAR	MO/DG	59	Polatuzumab vedotin	Polivy	Limfoma			3.7	NA		6	NA	NA	3,8/100.000	with	Combined	9.5	5.8	0.45	0.275	0.4	0.225	0.05	0.05	NA	12.4	7.7	1	0.026	0.844	0.126	0.2	-0.082	Yes	0.333	0.102	6.2	588	unknown	NA	Yes	Once		Other	Other	Injection	With	NA	Non Curative
Database	MO/DG	59	Polatuzumab vedotin	Polivy	No-Hodgkin lymphoma	Orphan designation	Conditional approval	3.7	NA	0.75	6	NA	11.15	3.8	with	Combined	9.5	5.8	0.45	0.275	0.4	0.225	0.05	0.05	Not applicable	12.4	7.7	1	0.026	0.844	0.126	0.2	-0.082	Yes	0.333	0.102	6.2	588	NA	NA	Yes	Once	month	Other	Other	Injection	With	NA	Non Curative
Unit	Of Time							months			months															months	months										months					Month
Source / comments	Source / Comments							depenent de la teràpia utilitzada pot variar.		no disponible	IPT			EPAR		Diferens tractaments en pacients R/R: R-GEMOX (rituxi + gemcitabina+ oxiloplati) o BR (bendamustina + rituxi) o CAR-T o pixantrona, etc.	HR: 0,36 [95%CI: 0,21-0,63] p=0,0002	control group: 3,7		Control group: 17,5		control group: 17,5				(9-NE) HR: 0,37 [95%CI: 0,16-0,85]	Control group: 4,7		97.4		Control group: 71,8		Control group: 28,2									cada 21 dies durant sis cicles		sempre la mateixa pauta	6 cicles fixe		rituximab + bendamustina
EPAR	MO/DG	63	Gilteritinib	Xospata	LMA			0.7	NA	0.1	<6	NA	NA	4,2/100.000	with	Chemotherapy	2.8	2.1	0.676	0.418	0.211	0.092	0.134	0.094	NA	9.3	3.7	1	0.018	0.959	0.097	0.289	0.142	Yes	0.236	0.117	114	764	Unknown	NA	No	Once		Other	Other	Oral	Without	NA	Non Curative
Database	MO/DG	63	Gilteritinib	Xospata	Acute myeloid leukemia	Orphan designation	Full approval	0.7	NA	0.1	<6	NA	11	4.2	with	Chemotherapy	2.8	2.1	0.676	0.418	0.211	0.092	0.134	0.094	Not applicable	9.3	3.7	1	0.018	0.959	0.097	0.289	0.142	Yes	0.236	0.117	114	764	NA	NA	No	Once	day	Other	Other	Oral	Without	NA	Non Curative
Unit	Of Time							months									months	months								months	months										days					Day
Source / comments	Source / Comments							dades del progressió lliure d'esdeveniments del braç control		Supervivència a cinc anys després de recaiguda. En altres tractaments per LMA hem posat la SG en funció de l'edat. Segones recaigudes la supervivència és de setmanes.	5,3 mesos grup control amb QT					Baixa intensitat (cicles de 28 dies): Esquema LoDAC: citarabina sc o iv 20 mg dos cops al dia durant 10 dies.Azacitidina sc o iv durant 7 dies. Alta intensitat (cicles de 28 dies): MEC (mitoxantrona, etoposido i citarabina durant 5 dies), FLAG-IDA (fludarabina, citarabina i idarubicina i G-CSF)	Event free survival (relapse, treatment failure, death, censored events) 1,4-3,7 HR: 0,793 [95%CI: 0,577-1.089]	Control group: 0,7 (0,2-NE)	Overall response rate contempla diferents CR (CR, CRi, CRp, PR)	control group: 25,8	16,2-26,8	control group: 11,9% (6,5-19,5)		Control group: 4%		7,7-10,7 HR: 0,637 [95%CI: 0,49-0.83] p=0,0004	Control group: 5,6 (4,7-7,3)		Control group: 98,2		Control group: 86,2		Control group: 14,7	increase and decrease	interruptions. Un 10% discontinuation pero son dades integrades de varis assaigs.	Control group: 11,9%			S'està fent recerca en NSCLC, solid tumours or AML					NO	up to progression
Criteria	Evaluator	Identification EPAR #	Product (active)	Product (Brand)	Indication (tumour)			Speed tumor growth	% Metastasized	Expected survival 5-years	Overall Survival	Physical function and general health (SF36 - EQ5D - eortc qlq-c30)	Prevalence	Incidence	Treatment options	Type of standard of care	Progression Free Survival	Progression Free Survival	Objective Response Rate (RECIST/MRD)	Objective Response Rate (RECIST/MRD)	Complete response (RECIST/MRD)	Complete response (RECIST/MRD)	Partial response (RECIST /MRD)	Partial response (RECIST /MRD)	Long responders	Overall Survival	Overall Survival	Any Advers Events	Any Advers Events	Non-Fatal Serious Advers Events (>3)	Non-Fatal Serious Advers Events (>3)	Fatal Advers Events (Grade 5 AEs)	Fatal Advers Events (Grade 5 AEs)	Dosage adjustment due to adverse effects	Treatment discontinuation (due to AEs)	Treatment discontinuation (due to AEs)	Median duration of treatment	Other Indications (patienties exposed)	Other Indications (number of indications)	HRQoL	Impact on Autonomy	Frequency of treatment (how often is administered)		Variable treatment guideline	Time of treatment	Easy to Use / Mode & Setting of Administration	Combined chemotherapy	Magnitude of Clinical benefits MCBS	Curative/Non Curative
METRIC								% increase (in tumor volume during one month) - category according to OS data in trials	% patients	%	Months (median)	Score	n/100.000	n/100.000	With/Without alternative	Chemotherapy / Immunotherapy / Directed agents /Surgery / Radio/ Combined /Others / None	Months (median )	Months (difference)	% Patients (observed)	% Patients (difference)	% Patients (observed)	% Patients (diference)	% Patients (observed)	% Patients (difference)	Mentioned (%)	Months (median)	Months (difference)	% Patients (observed)	% Patients (difference)	% Patients (observed)	% Patients (difference)	% Patients (observed )	% Patients (difference)	Mentioned	% Patients (observed)	% Patients (difference)	Months	# patients	# Indications	Score	(Y/N)	time		(Y/N)	Fixed / Up to progression	Oral/Injection/intratechal	With/Without	ESMO SCALE	Curative / Non Curative
Definition								Time of duplication for solid tumours; time of duplication for hematological tumours. Single source such as Harrison's textbook or other source - to be specified	With metastasis at diagnosis; Cancer burden reports if the tumour is available : https://gco.iarc.fr/survival/survmark/	Survival expectation of indication as in https://gco.iarc.fr/survival/survmark/	Overall Survival is: less than 6 months, 6 to 12 months, 12 to 24 months, more than 24months. Check for disease in Cancer burden reports WHO at: https://gco.iarc.fr/survival/survmark/	Collect baseline value and maximum value for 100% health.	Proportion of cases in a given population at a given time	Number of new cases per population at risk in a given time period	The alternative is therapeutic abstention	Collect name of agents used, if any // radiotherapy// surgery - Use clinical guidance: SEOM/icopraxis/catsalut, ESMO guidance, ASCO guidance.	The median survival time during which patients have not experienced disease progression	The median survival time during which patients have not experienced disease progression	The proportion of patients that experience complete response and partial response	The proportion of patients that experience complete response and partial response	The proportion of patients that experience complete response	The proportion of patients that experience complete response	Reduced tumor burden but residual disease detectable	Reduced tumor burden but residual disease detectable	Mentioned (%)	The median time from treatment randomisation to death	The median time from treatment randomisation to death	The proportion of patients experiencing an adverse event	The proportion of patients experiencing an adverse event	The proportion of patients experiencing a Grade > 3	The proportion of patients experiencing a Grade > 3	The proportion of patients experiencing a Grade 5 adverse event	The proportion of patients experiencing a Grade 5 adverse event	Mentioned	The proportion of patients discontinuing treatment due to adverse events	The proportion of patients discontinuing treatment due to adverse events	Median and mean treatment duration	Number of potential patients for indications . Use size of exposed population as reported in EPAR	Number of indications	Score; If absent, record absence	Disruption of daily activities due to delivering of treatment: delivered in hospital site, in-hospital admission, imparired activities of daily life..	Normal duration of use; dose adminsitration by unit of time. Frequency of treatment (i ex every 6 months or monthly). When multiple, worse guideline for the patient.		Identify if the treatment guideline changes	Identify if the treatment includes a fixed number of cycles	Type of formulation	Treatment includes combination with chemotherapy	MCBS defined by ESMO; If unavailable, calculate - if more than one trial, calculate for pivotal	Curative: therapeutic intervention aimed to eradicate the disease; Non curative: unlikely to achieve tumour eradication,aimed to prolong survival and palliate symptoms.
EPAR	CP/DE	10	Tivozanib	Fotivda	Advanced renal cell cancer		centralized authorization	460.01 days (range 174-913 days).	0.3	0.85	>24	FACT-G score 77/108	NA	14.8 cases per 100.000 inh	with	Directed agents	11.9 months	1.2 months	33.1%	NS	1.2%	0.4%	31.9%	9.8%	No	28.6 months	-2.6 months	78.4%	11.5%	TEAEs 64% - Related 28.6%	0.06	10.8%	0.05	Yes	14.7%	1.5%	15 months / 12 months	~max 2000? / 835	1	FACT-G 73/108, not significant between groups	No	Once		Yes	Up to progression	Oral	Without	1	Non Curative
Database	CP/DE	10	Tivozanib	Fotivda	Advanced renal cell cancer	No orphan	Full approval	15.3	0.3	0.85	>24	71.2963	18	14.8	with	Directed agents	11.9	1.2	0.331	0.1	0.012	0.004	0.319	0.098	Not applicable	28.6	-2.6	0.784	0.115	0.286	0.06	0.108	0.05	Yes	0.147	0.015	15	835	1	0	No	Once	day	Yes	Up to progression	Oral	Without	1	Non Curative
Unit	Of Time														with	Directed agents																									No	Day		Other	Other
Source / comments	Source / Comments	Centralized authorization	Tivozanib	Fotivda	Fotivda is indicated for the first line treatment of adult patients with advanced renal cell carcinoma (RCC) and for adult patients who are VEGFR and mTOR pathway inhibitor-naïve following disease progression after one prior treatment with cytokine therapy for advanced RCC. Source ->IPT, EPAR, NICE, ESMO-MCBS, SEOM, ESMO, ASCO,			http://dx.doi.org/10.4103/0970-1591.126894	IPT – also, 30% will metastatize along disease course	IPT: 85% if localized, 10% if metastatic	IPT: Mean with SOC (sorafenib) in trials 30.8 months	Total FACT-G Score (possible values from 0 to 108) was Mean (std) 77.05 (14.967) for tivozanib and 76.93 (15.949) for sorafenib at baseline.	NA	6878 cases/year in Spain 2017 (46.53 milion inh) BUT: https://ecis.jrc.ec.europa.eu/ indicates 8554 cases in 2020, of which 2999 deaths (?)	Sorafenib	Sorafenib (kinase inhibitor with antiangiogenic properties). Also immunotherapy, chemotherapy / Combined? DE: nefrectomía citorreductiva, resección de metástasis y/o terapia sistémica. IPT: Sunitinib, pazopanib y bevacizumab en combinación con IFN-α han desplazado a las citoquinas y al IFN-α como estándar de tratamiento en pacientes con CCRm que no han recibido tratamiento previo.	IPT 11.9 tivozanib vs 9.1 sorafenib // 12.7 vs 9.1 if no previous treatment (1st line) /// DE --> EPAR: 14.7 --> Efficacy results (pag.88) based on pivotal & extension (AV-951-09-301/902) / BUT IPT: el grupo tivozanib respecto a sorafenib de 3,6 meses (12,7 tivozanib vs. 9,1 meses sorafenib; p=0,037)	IPT HR 0.797 (0.639 to 0.993) /// DE: if EPAR reference diference is 5	IPT 33.1% vs 23.3% Not significant /// DE --> EPAR: page 88 --> For patients who remained on initial randomised tivozanib or sorafenib, the ORR was 55.7% (95% CI: 44.7%, 66.3%) and 57.1% (95% CI: 37.2%, 75.5%) respectively.	IPT 9.8% not significant / DE --> -1.4 EPAR pag 88	EPAR 1.2% vs 0.8%	EPAR NS	EPAR 31.9% vs 22.6%	EPAR Not tested (only ORR)	EPAR Not mentioned	IPT 28.6 vs 30.8 in sorfenib	IPT Tizo group no crossover, sorafenib failures received tivozanib. HR 1.147 (0.896 to 1.470)	EPAR 78.4 vs 89.9%	EPAR (not tested for significance)	EPAR: TEAEs 64% vs 70% - Related 28.6% vs 21.8%		IPT 10.8% vs 5.8%	Mostly due to disease progression	dose reduction 37.4% vs 22.4% sorafenib Different concepts: dose reduction, dose interruption, treatment discontinuation	14.7% vs 13.2 %	Cerebrovascular events mentioned	Not described in IPT nor EPAR – inferred form time to progression 15 months vs 12.9 months in sorafenib / DE --> EPAR: Pag 93 - "duration of exposure"	IPT: one third of all with Advanced càncer at dx per year, if 6000 new cases, 2000 potential candidates. // DE --> EPAR: Pag 93 - "duration of exposure"	Only Advanced renal cancer	FACT-G at the end of treatment 215 patients in the tivozanib arm and 214 patients in the sorafenib arm completed the questionnaire and the scores were Mean (std) 73.53 (17.781) and 73.04 (18.110) respectively, changes from baseline were -3.66 (14.995) for tivozanib and -4.82 (14.684) for sorafenib. The results were not statistically significant.	Ambulatory oral treatment	Once daily 21 days, 7 days rest, continued while on response		May be modified per safety	Up to disease progression			In 1st line ESMO 1 In 2nd line ESMO 3 (unlikely there are candiates)	NICE: Does not meet the criteria for being considered as a life-extending treatment for people with a short life expectancy (does not achieve a mínimum increase of 3 or more months vs alternatives)
EPAR	CP/DE	17	Dinutuximab beta	Qarziba	Neuroblastoma		Exceptional circumstances		91-100%	0.5	>24	NA	NA	31	with	Chemotherapy	19.5	15	0.36	NA	0.13	NA	0.23	NA	No	24,6 months	12.3 months	1	NA	48,6% to 100%	NA	2-3%	NA	Not Relevant	9,3% to 22,7%	NA	4,46 cycles	514	0	NA	Yes	Other		Yes	Fixed	Injection	With	A	Curative
Database	CP/DE	17	Dinutuximab beta	Qarziba	Neuroblastoma	Orphan designation	Exceptional circumstances	NA	0.95	0.5	>24	NA	1	31	with	Chemotherapy	19.5	15	0.36	NA	0.13	NA	0.23	NA	Not applicable	24.6	12.3	1	NA	0.48	NA	0.02	NA	Not Relevant	0.093	NA	5	514	0	NA	Yes	Other	other	Yes	Fixed	Injection	With	A	Curative
Unit	Of Time																Months	months								Months	Months															Other		Other	Other
Source / comments	Source / Comments	Authorization under exceptional circumstances	Dinutuximab beta	Qarziba	Qarziba is indicated for the treatment of high-risk neuroblastoma in patients aged 12 months and above, who have previously received induction chemotherapy and achieved at least a partial response, followed by myeloablative therapy and stem cell transplantation, as well as patients with history of relapsed or refractory neuroblastoma, with or without residual disease. In relapsed/refractory disea…			Not found		High risk	7.3 years in external control cohort	Not reported	NA	Spain:70 cases per year (6,88 inhabitants aged -14y * 10.2 cases per million children under 15 years of age) of which 45% high risk-> 31 cases // accounts for approximately 7% of paediatric malignancies	Several standards of care	Chemotherapy, other immunotherapy	Median 584 days vs 135 days – page 84 EPAR	EFS 135 in control		No control		No control		No control		Median not achieved vs 383.3 // mean 749 days (24,6 months) vs 368 days (12,3 months) page 84 EPAR			No control		No control		No control	Many details on individual cases	minimum and maximum across pivotal and supportive trials	No control	Derived from table 38 in page 92 EPAR	Overall exposure in the development, no other patients available	Only neuroblastoma	Not reported	Heavy impact, intravenous several days per cycle, poor tolerability, pain	5 cycles of 35 days with dose by body Surface – posology can be 5 infusions of 8 hours in consecutive days or 10 days continuous infusion. Requires previous dosing of retinoid acid and IL-2		Many details on individual cases	5 cycles, but studies report longer administrations	infusion? intravenous perfusion during 8 hours or all day long, depending on posology	Without with chemo? /// IL-2 and retinoid acid	The score is màximum and in a curative setting, but the quality of evidence is very low and may vary susbstantially if the control data is looked at in diferent ways	Curative setting
EPAR	CP/DE	31	Brigatinib	Alunbrig	Lung cancer - NMSCLC		Centralized authorization	221.6 days for adenocarcinoma, 115.2 days for squamous cell carcinoma	60% Advanced disease / 69.4%	0.15	12 to 24	55.4/100		58.6	with	Directed agents	9,2% //15,6%		45,5%//56,4%		1,8%//4,5%		43,8% // 51,8%		Yes	29,5//34,1		1		63,3% // 70,9%		19,3% // 10,0% Related: 11%//6,4%		Yes	7.3% / 10,9%		22,9 months	274 / 219	1	absent / 58.49	No	Once		Yes	Up to progression	Oral	Without	3	Non Curative
Database	CP/DE	31	Brigatinib	Alunbrig	Lung cancer - NMSCLC	No orphan	Full approval	3.8	0.65	0.15	12-24	55.4	38.9	58.6	with	Directed agents	15.6	NA	0.56	NA	0.018	NA	0.43	NA	Yes	29.5	NA	1	NA	0.633	NA	0.11	NA	Yes	0.073	NA	22.9	274	1	NA	No	Once	day	Yes	Up to progression	Oral	Without	3	Non Curative
Unit	Of Time																months									Months								Yes							No	Day		Other	Other
Source / comments	Source / Comments	Centralized authorization	Brigatinib	Alunbrig	Alunbrig is indicated as monotherapy for the treatment of adult patients with anaplastic lymphoma kinase ALKpositive advanced NSCLC previously treated with crizotinib.			Jpn J Clin Oncol . 1994 Aug;24(4):199-204.	25% es diagnostiquen en estadiatge III (localment avançat no resecable, no metastàtic), 30-40% poden fer Q-R. /// DE --> IPT: avanzado o metastasico. "El 69,4% (154/222) de los pacientes presentaban metástasis cerebrales y de estos, en el 70,8% (109/154) eran metástasis cerebrales activas"/ Ensayo clínico fase II (AP26113-13-201)	9% to 13% according to IPT	Median life expectancy reported in ASCEND-2 was 14.9 months and in ASCEND-5 it was 18.1 months. Mean overall survival was not reported in ASCEND-2 and ASCEND-5. The company's model predicted a mean overall survival of 22 months for people with ALK-positive advanced NSCLC.	QLQ-C30 (EPAR)		Lung cancer incidence/100.000 inh/year (numbers extracted from IPT: 27351 cases in 2018; inhabitants from INE: 46,658,447 by january 2018)	Alectinib, ceritinib, chemotherapy	Directed agents /// DE --> Combined? IPT: "co-administración de un platino con agentes tales como taxanos, gemcitabina, vinorelbina, pemetrexed, etopósido y vinblastina"	Arm A, Arm B / HR 0,64 (0,45-0,91)	No control	Arm A, Arm B	No control	Arm A, Arm B	No control	Arm A, Arm B	No control	EPAR: Conclusions on the clinical efficacy. The efficacy for the treatment of adult patients with anaplastic lymphoma kinase (ALK)-positive advanced non-small cell lung cancer (NSCLC) previously treated with crizotinib is demonstrated on the basis of high ORR and long duration of response. Pag 99	Arm A, Arm B / HR 0,67 (0,42-1,06)	No control	DE: 95,5% EPAR: Table 67: Overview of TEAEs (Treated Population – Study 201) 90/180 / Drug related	No control	In each cohort /// DE --> 35.5% EPAR: Table 67: Overview of TEAEs (Treated Population – Study 201) 90/180 / Drug related	No control	Most cases due to disease progression, less frequently in the high doe sarm (B) /// DE --> 10% EPAR: Table 67: Overview of TEAEs (Treated Population – Study 201) 90/180 / Drug related	No control	Page 12 of epar	DE --> EPAR: Table 67: Overview of TEAEs (Treated Population – Study 201) 90/180 / Drug related	No control	IPT	DE --> EPAR: Table 65: Study 201 Drug Exposure (Treated Population). Data extraction date (29/09/2017)	Post crizotinib (current) and first line (presented later)	Data available for baseline, seems that no differences were observed at end-of-study. Graph with no numbers. /// DE --> EPAR: Figure 20: Adjusted Mean Scores for Transformed Global Health Status/QOL Scale over Time (ITT Population) - C30 / Arm 90-180		First week with half dose, then 180 mg		If adverse effects, by -60, -30, -30 consecutively. If not enough, discontinue.			monotherapy	Version 1.1
EPAR	CP/DE	36	Durvalumab	Imfinzi	Lung cancer - NMSCLC		Centralized authorization	221.6 days for adenocarcinoma, 115.2 days for squamous cell carcinoma	60% Advanced disease	0.15	12 to 24	NA / 54.9		58.6	without	None	44244	44358	28.4%	12.4%	1.4%	0.9%	27.1%	11.6%	No	NA	28.7 / ?	96.8%	1.9%	12% / 8.4%	7.3% / 5%	44290	-1.6%%	No	9.9%	6.5%	16.5 infusions / 28.3 months	1.7 / 709	no	No significant differences	Yes	Twice		No	Fixed	Injection	Without	3	Non Curative
Database	CP/DE	36	Durvalumab	Imfinzi	Lung cancer - NMSCLC	No orphan	Full approval	3.8	0.6	0.15	12 to 24	54.9	38.9	58.6	without	None	17.2	11.6	0.284	0.124	0.014	0.09	0.271	0.116	Not mentioned	NA	NA	0.968	0.019	0.12	0.073	0.044	-0.016	No	0.099	0.065	28.3	709	0	0	Yes	Twice	month	No	Fixed	Injection	Without	3	Non Curative
Unit	Of Time																										months														Yes	Month
Source / comments	Source / Comments	Centralized authorization	Durvalumab	Imfinzi	IMFINZI as monotherapy is indicated for the treatment of locally advanced, unresectable non-small cell lung cancer (NSCLC) in adults whose tumours express PD-L1 on ≥ 1% of tumour cells and whose disease has not progressed following platinum-based chemoradiation therapy. IMFINZI in combination with etoposide and either carboplatin or cisplatin is indicated for the first-line treatment of adults wi…			Jpn J Clin Oncol . 1994 Aug;24(4):199-204.	25% es diagnostiquen en estadiatge III (localment avançat no resecable, no metastàtic), 30-40% poden fer Q-R.	9% to 13% according to IPT	Median life expectancy reported in ASCEND-2 was 14.9 months and in ASCEND-5 it was 18.1 months. Mean overall survival was not reported in ASCEND-2 and ASCEND-5. The company's model predicted a mean overall survival of 22 months for people with ALK-positive advanced NSCLC.	Only information is WHO performance status at baseline, being 0 for 48,8% and 1 in 50,8%. EORTC-QLQ-C30 and C13 are informed only for change from baseline, but data on baseline values is not available. No significant changes are reported after treatment. /// DE --> EPAR: Figure 23 Forest plot of Time to deterioration of EORTC QLQ-C30 and QLQ-LC13 subscales and items		Lung cancer incidence/100.000 inh/year (numbers extracted from IPT: 27351 cases in 2018; inhabitants from INE: 46,658,447 by january 2018)	The alternative in the approved indication is active follow-up	vigilance only /// DE --> Combined? IPT:quimiorradiación concurrente con intención curativa. Cuando la quimiorradiación concurrente no es posible, la quimioterapia secuencial seguida de radioterapia definitiva	IPT: 17.2 (13.1 to 23.9) HR 0.51(0.41 to 0.63) EPAR: 16.8 vs 5.6, HR 0.52 90%CI: 0.39, 0.70	control 5.6 (4.6 to 7.7)	126/443	control 16% (34/213)		control 0.5%		control 15.5%	not mentioned in IPT nor EPAR	Median no achieved	OS at 24 months 66,3% vs 30.8% in control group /// 0,68 (0,53 - 0,87) Valor p- bilateral 0,00251		94.9%	DE --> IPT: Los EA graves relacionados con el tratamiento ocurrieron en el 8,4% y 3,4% de los pacientes, respectivamente.	4.7% /// DE --> IPT: Los EA graves relacionados con el tratamiento ocurrieron en el 8,4% y 3,4% de los pacientes, respectivamente.		0.06	Dose reduction is not recommended - dose witholding or discontinuation may be required. Delay in administration 42.5% vs 30.8% in control group		3.4%	IPT says 44 weeks, EPAR mean 16.5 infusions vs 14.8 in control group. Median 20 infusions vs 14 /// DE --> IPT: IPT: la mediana de tiempo hasta la muerte o metástasis a distancia	14.8 // DE --> EPAR	only indication to moment; FDA has approved urotelial cancer under accelerated procedure	Only change from baseline reported, no absolute values.	needs day-care administration every 2 weeks for a 60 minutes infusion, during 12 months.	every two weeks for 12 months		only withstanding or discontinuation, no dose reduction nor specific guidance to withstanding.	maximum 1 year	intravenous infusion during 60 minutes	monotherapy	3 at the time of IPT, later data on OS available, changed to 4 on may 31st 2021. OS Control: 29.1 months 2-year OS: 55.3% 4-year OS: 36.3%; OS Gain: +18.4 months 2-year OS: +36.3% 4-year OS:+13.3% OS HR 0.71 (0.57-0.88)	DE --> IPT: alternativa con vocacion curativa
EPAR	CP/DE	65	Larotrectinib	Vitrakvi	Agnostic		Conditional approval		1					Globally, the calculated overall NTRK gene fusion incidence and 5-year prevalence were 0.52 and 1.52 per 100,000 persons, respectively.	without	None	27.4		0.67			0.15		0.51		16.7		0.8		0.19		0.06		No	0.02			167			No	Twice		Yes	Up to progression	Oral	Without	3	Non Curative
Database	CP/DE	65	Larotrectinib	Vitrakvi	Agnostic	No orphan	Conditional approval	NA	1	0	0	NA	1.52	0.52	without	None	27.4	NA	0.67	NA	NA	0.15	NA	0.51	Not apllicable	16.7	NA	0.8	NA	0.19	NA	0.06	NA	No	0.02	NA	NA	167	0	0	No	Twice	day	Yes	Up to progression	Oral	Without	3	Non Curative
Unit	Of Time																																									Day
Source / comments	Source / Comments	Conditional approval	Larotrectinib	Vitrakvi	Agnostic: treatment of adult and paediatric patients with solid tumours that display a Neurotrophic Tyrosine Receptor Kinase (NTRK) gene fusion, who have a disease that is locally advanced, metastatic or where surgical resection is likely to result in severe morbidity, and who have no satisfactory treatment options. Source -> EPAR / NICE / SEOM-ESMO				EPAR: "Patients included in all studies were required to have a locally advanced or metastatic solid tumour"					https://www.ncbi.nlm.nih.gov/pmc/articles/PMC7758559/		clinically managed based on care standards for the tumour site of origin	The progression-free survival (PFS) median event-rate was low at 37% (IRC) and 38% (INV) in the ePAS2, and the median was 27.4 months (95% CI: 13.8, NE) by IRC and 28.3 months (95% CI: 15.2, NE) by investigator assessments. The PFS rate at 6 months was 77%, and the PFS rate at 12 months was 64% (95% CI: 51, 76%) by IRC.		EPAR: table 62 [Pooled efficacy results n= 102]			EPAR: table 62		EPAR: table 62		The overall survival (OS) median was not reached in the ePAS2 as a result of the present very low event-rate of 15% (14/93 dead). The OS median follow-up time was 16.7 months														median score for pool trials not included in EPAR				if adverse reaction (EPAR pag 18)					The sought indication encompasses all malignant solid tumours types that have an NTRK gene fusion, with the exception of primary CNS tumours, and concerns a disease setting after standard therapy or when there is no appropriate available therapy. The intention of therapy in this setting is palliative
EPAR	CP/DE	75	Lorlatinib	Lorviqua	Lung cancer - NMSCLC		Conditional approval	221.6 days for adenocarcinoma, 115.2 days for squamous cell carcinoma	60% Advanced disease / 69%	0.13	12 to 24			58.6	with	Directed agents	44445	na	42.9%	na	3.6%	na	39.3%	na	Not mentioned	21.1 / 20	na	94.9%	na	41.0%	na	0	na	Yes	2.4%	na	16.33	no / 295	0		No	Once		Yes	Up to progression	Oral	Without	3	Non Curative
Database	CP/DE	75	Lorlatinib	Lorviqua	Lung cancer - NMSCLC	No orphan	Conditional approval	3.8	0.65	0.13	12 to 24	NA	38.9	58.6	with	Directed agents	6.9	NA	0.429	NA	0.036	NA	0.393	NA	Not mentioned	20	NA	0.949	NA	0.41	NA	NA	NA	Yes	0.024	NA	16.33	295	0	0	No	Once	day	Yes	Up to progression	Oral	Without	3	Non Curative
Unit	Of Time																									months											months					Day
Source / comments	Source / Comments	Conditional approval	Lorlatinib	Lorviqua	Lorviqua as monotherapy is indicated for the treatment of adult patients with anaplastic lymphoma kinase (ALK) positive advanced non small cell lung cancer (NSCLC) whose disease has progressed after alectinib or ceritinib as the first ALK tyrosine kinase inhibitor (TKI) therapy; or crizotinib and at least one other ALK TKI. Source -> IPT, EPAR, NiCE, ESMO			Jpn J Clin Oncol . 1994 Aug;24(4):199-204.	25% es diagnostiquen en estadiatge III (localment avançat no resecable, no metastàtic), 30-40% poden fer Q-R.	Discrepància 15% / 13,5%, poso 13%. 9% to 13% according to IPT / Estrategia Nacional 2021 (general pulmon) https://www.mscbs.gob.es/organizacion/sns/planCalidadSNS/pdf/Estrategia_en_cancer_del_Sistema_Nacional_de_Salud_Actualizacion_2021.pdf	Median life expectancy reported in ASCEND-2 was 14.9 months and in ASCEND-5 it was 18.1 months. Mean overall survival was not reported in ASCEND-2 and ASCEND-5. The company's model predicted a mean overall survival of 22 months for people with ALK-positive advanced NSCLC.			Lung cancer incidence/100.000 inh/year (numbers extracted from IPT: 27351 cases in 2018; inhabitants from INE: 46,658,447 by january 2018). Only 5% are ALK mutated.	Advanced ALK-positive NSCLC is usually first treated with an ALK tyrosine kinase inhibitor (alectinib or ceritinib, or crizotinib followed by either brigatinib or ceritinib). People then have either platinum doublet chemotherapy (PDC) or atezolizumab with bevacizumab, carboplatin and paclitaxel (ABCP). DE --> IPT: Actualmente lorlatinib es la única alternativa terapéutica autorizada de las difere…	crizotinib, ceritinib, alectinib, brigatinib, chemotherapy	separate results for 1 previous itk (6.9) or 2 or more (5.5)	no control	separate results for 1 previous itk (42.9%) or 2 or more (39.6%)	no control	separate results for 1 previous itk (3.6%) or 2 or more (1.8%)	no control	separate results for 1 previous itk (39.3%) or 2 or more (37.8%)	no control	not mentioned IPT nor EPAR	separate results for 1 previous itk (21.1 months) or 2 or more (19.2 months) / DE: EPAR: pag 89 (median phase II)	no control		no control		no control	no deaths attributed to related AEs	no control	21% required dose reduction. Dosing interruption or dose reduction may be required based on individual safety and tolerability.	2.4% required definitive discontinuation of treatment	no control	IPT	no other indications so far / DE--> EPAR: page 77 (patients exposure)		No absolute values, only change from baselin. The majority of patients had either improved (42.7%) or stable (39.6%) scores in global QoL during treatment (including all cycles).		oral treatment once daily		Lorlatinib dose reduction levels are summarised below: First dose reduction: 75 mg taken orally once daily; Second dose reduction: 50 mg taken orally once daily. Lorlatinib should be permanently discontinued if the patient is unable to tolerate the 50 mg dose taken orally once daily.	Until clinical progression or intolerance		monotherapy	https://www.esmo.org/guidelines/esmo-mcbs/esmo-mcbs-scorecards/scorecard-142-1
EPAR	CP/DE	77	Dacomitinib	Vizimpro	Lung cancer - NMSCLC		additional monitoring		1	0.135	12 to 24	-4.7	155	ESP CP (28.347); CPNM (80%-85%); metastasico (2/3); mutacion EGFR (10%)	with	Directed agents	14.7	5.5	0.749	0.033	0.696	0.002	0.132	0.012	not mentioned	34.1	7.3	0.969	0.018	0.097	0.03	0.009	0.009	Yes	0.013	-0.005	16.5	2122		-4.7	No	Once		No	Up to progression	Oral	Without	3	Non Curative
Database	CP/DE	77	Dacomitinib	Vizimpro	Lung cancer - NMSCLC	No orphan	Full approval	NA	1	0.135	12 to 24	0	38.9	22.9	with	Directed agents	14.7	5.5	0.749	0.033	0.696	0.002	0.132	0.012	Not mentioned	34.1	7.3	0.969	0.018	0.097	0.03	0.009	0.009	Yes	0.013	-0.005	16.5	2122	0	-0.047	No	Once	day	No	Up to progression	Oral	Without	3	Non Curative
Unit	Of Time																																									Day
Source / comments	Source / Comments	under additional monitoring	Dacomitinib	Vizimpro	Untreated EGFR mutation-positive non_x0002_small-cell lung cancer							EPAR (C30): In the dacomitinib arm, there was no statistically significant change from baseline observed for overall global QoL.	Estrategia Nacional 2021 (general pulmon) https://www.mscbs.gob.es/organizacion/sns/planCalidadSNS/pdf/Estrategia_en_cancer_del_Sistema_Nacional_de_Salud_Actualizacion_2021.pdf	IPT: Globocan 2018. International Agency for Research on Cancer. World Health Organization. http://globocan.iarc.fr. 4. Las cifras del cáncer en España 2018. Sociedad Española de Oncología Médica. Disponible en: https://seom.org/seomcms/images/stories/recursos/Las_Cifras_d el_cancer_en_Espana2018.pdf.		TKI (tyrosine kinase inhibitors) is a targeted tretament	HR: 0,589 (0,469-0,739)/ <0,0001									HR: HR 0,760 (0,582 – 0,993)/ P < 0,0219														QLQ-C30
[truncated: 14 more columns]

## Sheet: regulatory_orphan_status
Product (active)	(All)
Count of Product (Brand)	Orphan status	Type of authorization
	No orphan		No orphan Total	Orphan designation			Orphan designation Total	Grand Total
Indication (tumour)	Conditional approval	Full approval		Conditional approval	Exceptional circumstances	Full approval
Acute lymphoblastic leukemia						1	1	1
Acute myeloid leukemia						3	3	3
Advanced renal cell cancer		1	1					1
Agnostic	1		1					1
Breast cancer		4	4					4
Chronic myeloid leukemia						1	1	1
Cutaneous T cell lymphoma						1	1	1
Lung cancer - NMSCLC	1	3	4					4
Melanoma		2	2					2
Neuroblastoma					1		1	1
No-Hodgkin lymphoma				1			1	1
Ovarian cancer	1		1			1	1	2
Prostate cancer		1	1					1
Grand Total	3	11	14	1	1	7	9	23

## Sheet: disease severity_all
Product (active)	(All)
							Average of % Metastasized
Indication (tumour)	Count of Product (Brand)	Average of Speed tumor growth	Average of Physical function and general health (SF36 - EQ5D - eortc qlq-c30)	Average of Expected survival 5-years	Average of % Metastasized		0.05
Acute lymphoblastic leukemia	1	1.8	76	0.085	0.075		0.1
Acute myeloid leukemia	3	6.00333	#DIV/0!	0.191333	1		0.15
Advanced renal cell cancer	1	15.3	71.2963	0.85	0.3		0.3
Agnostic	1	#DIV/0!	#DIV/0!	0	1		0.375
Breast cancer	4	35.65	68.225	0.320833	0.05		0.725
Chronic myeloid leukemia	1	3	#DIV/0!	0.19	1		0.95
Cutaneous T cell lymphoma	1	3.1	#DIV/0!	0.745	0.25		1
Lung cancer - NMSCLC	4	6.525	36.7667	0.14125	0.725		#DIV/0!
Melanoma	2	12.3	66.72	0.17	0.15		#DIV/0!
Neuroblastoma	1	#DIV/0!	#DIV/0!	0.5	0.95		#DIV/0!
No-Hodgkin lymphoma	1	3.7	#DIV/0!	0.75	0.33		#DIV/0!
Ovarian cancer	2	17.3	85	0.295	0.375		#DIV/0!
Prostate cancer	1	4.5	82	0.846	0.1		0.40625
Grand Total	23	13.2052	63.9182	0.318188	0.485

## Sheet: disease severity_OS
Product (active)	(All)
Count of Product (Brand)	Overall Survival
Indication (tumour)	<6	>24	12-24	NA	Grand Total
Acute lymphoblastic leukemia	1				1
Acute myeloid leukemia	2		1		3
Advanced renal cell cancer		1			1
Agnostic			1		1
Breast cancer		2	1	1	4
Chronic myeloid leukemia		1			1
Cutaneous T cell lymphoma		1			1
Lung cancer - NMSCLC			4		4
Melanoma		2			2
Neuroblastoma		1			1
No-Hodgkin lymphoma	1				1
Ovarian cancer		1		1	2
Prostate cancer		1			1
Grand Total	4	10	7	2	23

## Sheet: afected population_all
					Row Labels	Average of Prevalence	Average of Incidence
Product (active)	(All)				Prostate cancer	1118	150.6
					Breast cancer	577.3	74.4
					Lung cancer - NMSCLC	38.9	49.675
Indication (tumour)	Count of Product (Brand)	Average of Prevalence	Average of Incidence		Grand Total	172.735	32.4313
Acute lymphoblastic leukemia	1	10	1.3		Neuroblastoma	1	31
Acute myeloid leukemia	3	11.8667	4		Advanced renal cell cancer	18	14.8
Advanced renal cell cancer	1	18	14.8		Melanoma	42	8
Agnostic	1	1.52	0.52		Ovarian cancer	42.9	7.5
Breast cancer	4	577.3	74.4		Chronic myeloid leukemia	2	4.2
Chronic myeloid leukemia	1	2	4.2		Acute myeloid leukemia	11.8667	4
Cutaneous T cell lymphoma	1	10.3	0.4		No-Hodgkin lymphoma	11.15	3.8
Lung cancer - NMSCLC	4	38.9	49.675		Acute lymphoblastic leukemia	10	1.3
Melanoma	2	42	8		Agnostic	1.52	0.52
Neuroblastoma	1	1	31		Cutaneous T cell lymphoma	10.3	0.4
No-Hodgkin lymphoma	1	11.15	3.8
Ovarian cancer	2	42.9	7.5
Prostate cancer	1	1118	150.6
Grand Total	23	167.051	32.4313

## Sheet: unmet need_all_combined
Product (active)	(All)
Count of Product (Brand)		Type of standard of care
Indication (tumour)	Treatment options	Chemotherapy	Combined	Directed agents	None	Others	Grand Total
Acute lymphoblastic leukemia	with		1				1
Acute lymphoblastic leukemia Total			1				1
Acute myeloid leukemia	with	3					3
Acute myeloid leukemia Total		3					3
Advanced renal cell cancer	with			1			1
Advanced renal cell cancer Total				1			1
Agnostic	without				1		1
Agnostic Total					1		1
Breast cancer	with			4			4
Breast cancer Total				4			4
Chronic myeloid leukemia	with		1				1
Chronic myeloid leukemia Total			1				1
Cutaneous T cell lymphoma	with		1				1
Cutaneous T cell lymphoma Total			1				1
Lung cancer - NMSCLC	with			3			3
	without				1		1
Lung cancer - NMSCLC Total				3	1		4
Melanoma	with			2			2
Melanoma Total				2			2
Neuroblastoma	with	1					1
Neuroblastoma Total		1					1
No-Hodgkin lymphoma	with		1				1
No-Hodgkin lymphoma Total			1				1
Ovarian cancer	with	1		1			2
Ovarian cancer Total		1		1			2
Prostate cancer	with					1	1
Prostate cancer Total						1	1
Grand Total		5	4	11	2	1	23

## Sheet: efectiveness_no_control
Product (active)	(All)									over average
								Row Labels	Average of Progression Free Survival active	Average of Objective Response Rate (RECIST/MRD) active	Average of Complete response (RECIST/MRD) active	Average of Partial response (RECIST /MRD) active	Average of OS trials active			Row Labels	Average of Objective Response Rate (RECIST/MRD) active	Average of Complete response (RECIST/MRD) active	Average of Partial response (RECIST /MRD) active	Average of OS trials active		Row Labels	Average of Partial response (RECIST /MRD) active	Average of OS trials active
Indication (tumour)	Count of Product (Brand)	Average of Progression Free Survival active	Average of Objective Response Rate (RECIST/MRD) active	Average of Complete response (RECIST/MRD) active	Average of Partial response (RECIST /MRD) active	Average of OS trials active		Acute lymphoblastic leukemia	5	#DIV/0!	0.807	#DIV/0!	7.7			Advanced renal cell cancer	0.331	0.012	0.319	28.6		Acute lymphoblastic leukemia	#DIV/0!	7.7
Acute lymphoblastic leukemia	1	5	0.81	0.807	#DIV/0!	7.7		Cutaneous T cell lymphoma	7.7	0.28	0.043	0.189	#DIV/0!			Breast cancer	0.51	0.0363333	0.473667	22.3		No-Hodgkin lymphoma	0.05	12.4
Acute myeloid leukemia	3	11.11	0.656	0.429333	0.116667	15.4533		Chronic myeloid leukemia	8.2	#DIV/0!	0.589	#DIV/0!	74.7			Cutaneous T cell lymphoma	0.28	0.043	0.189	#DIV/0!		Acute myeloid leukemia	0.116667	15.4533
Advanced renal cell cancer	1	11.9	0.331	0.012	0.319	28.6		No-Hodgkin lymphoma	9.5	0.45	0.4	0.05	12.4			Melanoma	0.63	0.08	0.55	33.6		Agnostic	#DIV/0!	16.7
Agnostic	1	27.4	0.67	0.15	0.51	16.7		Ovarian cancer	10.65	0.717	0.085	0.462	#DIV/0!			Ovarian cancer	0.717	0.085	0.462	#DIV/0!		Breast cancer	0.473667	22.3
Breast cancer	4	18.3	0.51	0.0363333	0.473667	22.3		Acute myeloid leukemia	11.11	0.656	0.429333	0.116667	15.4533			Neuroblastoma	0.36	0.13	0.23	24.6		Neuroblastoma	0.23	24.6
Chronic myeloid leukemia	1	8.2	#DIV/0!	0.589	#DIV/0!	74.7		Advanced renal cell cancer	11.9	0.331	0.012	0.319	28.6			Lung cancer - NMSCLC	0.5055	0.191	0.3065	27.8667		Grand Total	0.314529	25.6107
Cutaneous T cell lymphoma	1	7.7	0.28	0.043	0.189	#DIV/0!		Lung cancer - NMSCLC	13.6	0.5055	0.191	0.3065	27.8667			Grand Total	0.532667	0.230895	0.314529	25.6107		Lung cancer - NMSCLC	0.3065	27.8667
Lung cancer - NMSCLC	4	13.6	0.5055	0.191	0.3065	27.8667		Grand Total	14.3274	0.532667	0.230895	0.314529	25.6107			No-Hodgkin lymphoma	0.45	0.4	0.05	12.4		Advanced renal cell cancer	0.319	28.6
Melanoma	2	14.9	0.63	0.08	0.55	33.6		Melanoma	14.9	0.63	0.08	0.55	33.6			Acute myeloid leukemia	0.656	0.429333	0.116667	15.4533		Melanoma	0.55	33.6
Neuroblastoma	1	19.5	0.36	0.13	0.23	24.6		Breast cancer	18.3	0.51	0.0363333	0.473667	22.3			Chronic myeloid leukemia	#DIV/0!	0.589	#DIV/0!	74.7		Chronic myeloid leukemia	#DIV/0!	74.7
No-Hodgkin lymphoma	1	9.5	0.45	0.4	0.05	12.4		Neuroblastoma	19.5	0.36	0.13	0.23	24.6			Acute lymphoblastic leukemia	#DIV/0!	0.807	#DIV/0!	7.7		Cutaneous T cell lymphoma	0.189	#DIV/0!
Ovarian cancer	2	10.65	0.717	0.085	0.462	#DIV/0!		Agnostic	27.4	0.67	#DIV/0!	#DIV/0!	16.7			Prostate cancer	#DIV/0!	#DIV/0!	#DIV/0!	#DIV/0!		Ovarian cancer	0.462	#DIV/0!
Prostate cancer	1	28.3	#DIV/0!	#DIV/0!	#DIV/0!	#DIV/0!		Prostate cancer	28.3	#DIV/0!	#DIV/0!	#DIV/0!	#DIV/0!			Agnostic	0.67	#DIV/0!	#DIV/0!	16.7		Prostate cancer	#DIV/0!	#DIV/0!
Grand Total	23	14.3274	0.547263	0.22685	0.325389	25.6107

## Sheet: efectiveness_control
Product (active)	(All)										overaverage
											comonn with absolute
								Row Labels	PFS	ORR	CR	PR	OS
Indication (tumour)	Count of Product (Brand)	Average of Progression Free Survival difference to control	Average of Objective Response Rate (RECIST/MRD) difference to control	Average of Complete response (RECIST/MRD) difference to control	Average of Partial response (RECIST /MRD) difference to control	Average of OS trials difference to control		Advanced renal cell cancer	1.2	0.1	0.004	0.098	#DIV/0!
Acute lymphoblastic leukemia	1	3.2	0.51	0.513	#DIV/0!	1		Acute lymphoblastic leukemia	3.2	#DIV/0!	0.513	#DIV/0!	1
Acute myeloid leukemia	3	6.64	0.214	0.0713333	0.0653333	4.33667		Cutaneous T cell lymphoma	4.6	0.232	0.043	0.141	#DIV/0!
Advanced renal cell cancer	1	1.2	0.1	0.004	0.098	#DIV/0!		Chronic myeloid leukemia	5.2	#DIV/0!	0.054	#DIV/0!	49.1
Agnostic	1	#DIV/0!	#DIV/0!	#DIV/0!	#DIV/0!	#DIV/0!		Melanoma	5.3	0.125	0.03	0.1	10.1
Breast cancer	4	7.975	0.206333	0.0453333	0.177	2.8		No-Hodgkin lymphoma	5.8	0.275	0.225	0.05	7.7
Chronic myeloid leukemia	1	5.2	#DIV/0!	0.054	#DIV/0!	49.1		Ovarian cancer	6.6	#DIV/0!	#DIV/0!	#DIV/0!	#DIV/0!
Cutaneous T cell lymphoma	1	4.6	0.232	0.043	0.141	#DIV/0!		Acute myeloid leukemia	6.64	0.214	0.07	0.065	4.33
Lung cancer - NMSCLC	4	8.55	0.0785	0.046	0.064	7.3		Grand Total	7.1	0.17	0.09	0.13	10.31
Melanoma	2	5.3	0.125	0.03	0.1	10.1		Breast cancer	7.975	0.2	0.04	0.177	2.8
Neuroblastoma	1	15	#DIV/0!	#DIV/0!	#DIV/0!	12.3		Lung cancer - NMSCLC	8.55	0.0785	0.046	0.064	7.3
No-Hodgkin lymphoma	1	5.8	0.275	0.225	0.05	7.7		Prostate cancer	14.2	#DIV/0!	#DIV/0!	#DIV/0!	#DIV/0!
Ovarian cancer	2	6.6	#DIV/0!	#DIV/0!	#DIV/0!	#DIV/0!		Neuroblastoma	15	#DIV/0!	#DIV/0!	#DIV/0!	12.3
Prostate cancer	1	14.2	#DIV/0!	#DIV/0!	#DIV/0!	#DIV/0!		Agnostic	#DIV/0!	#DIV/0!	0.15	0.51	#DIV/0!
Grand Total	23	7.12211	0.198929	0.0894	0.103385	10.31
								absolute
								Row Labels	Average of Progression Free Survival active	Average of Objective Response Rate (RECIST/MRD) active	Average of Complete response (RECIST/MRD) active	Average of Partial response (RECIST /MRD) active	Average of OS trials active
								Acute lymphoblastic leukemia	5	#DIV/0!	0.807	#DIV/0!	7.7
								Cutaneous T cell lymphoma	7.7	0.28	0.043	0.189	#DIV/0!
								Chronic myeloid leukemia	8.2	#DIV/0!	0.589	#DIV/0!	74.7
								No-Hodgkin lymphoma	9.5	0.45	0.4	0.05	12.4
								Ovarian cancer	10.65	0.717	0.085	0.462	#DIV/0!
								Acute myeloid leukemia	11.11	0.656	0.429333	0.116667	15.4533
								Advanced renal cell cancer	11.9	0.331	0.012	0.319	28.6
								Lung cancer - NMSCLC	13.6	0.5055	0.191	0.3065	27.8667
								Grand Total	14.3274	0.532667	0.230895	0.314529	25.6107
								Melanoma	14.9	0.63	0.08	0.55	33.6
								Breast cancer	18.3	0.51	0.0363333	0.473667	22.3
								Neuroblastoma	19.5	0.36	0.13	0.23	24.6
								Agnostic	27.4	0.67	#DIV/0!	#DIV/0!	16.7
								Prostate cancer	28.3	#DIV/0!	#DIV/0!	#DIV/0!	#DIV/0!

[truncated: 24 more sheets: efectiveness_long_ responders, safety_no_control, safety_dosage, safety_other_indications, safety_control, PP_HRQOL, PP_impact_autonomy, PP_variable_treatment, PP_time_of_treatment, PP_easy_to_use, PP_combination, MCBS_c, MCBS_nc, ICER_thrld&fund, ICER_limits, ICER_cost, evidence_qual, evidence_experts, context_plans, context_preferences …]
